1 **Large-bodied ornithomimosaur** inhabited Appalachia during the Late  
2 **Cretaceous of North America**

3

4 Tsogtbaatar Chinzorig<sup>1,2\*¶</sup>, Thomas Cullen<sup>3¶</sup>, George Phillips<sup>4</sup>, Richard Rolke<sup>5</sup>,

5 Lindsay E. Zanno<sup>1,2¶</sup>

6

7

8 <sup>1</sup> Paleontology Research Lab, North Carolina Museum of Natural Sciences, Raleigh, North

9 Carolina, United States of America

10 <sup>2</sup> Department of Biological Sciences, North Carolina State University, Raleigh, North Carolina,

11 United States of America

12 <sup>3</sup> Carleton University, Ottawa, Ontario, Canada

13 <sup>4</sup> Conservation & Biodiversity Section, Mississippi Museum of Natural Science, Jackson,

14 Mississippi, United States of America

15 <sup>5</sup> Dow Chemical Company, Baton Rouge, Louisiana, United States of America

16

17

18

19 \* Corresponding author

20 E-mail: [ctsogtb@ncsu.edu](mailto:ctsogtb@ncsu.edu) (TC)

21

22

23

24 ¶These authors contributed equally to this work.

25

## 26 **Abstract**

27           Reconstructing the evolution, diversity, and paleobiogeography of North America’s Late  
28 Cretaceous dinosaur assemblages requires spatiotemporally contiguous data; however, there  
29 remains a spatial and temporal disparity in dinosaur data on the continent. The rarity of  
30 vertebrate-bearing sedimentary deposits representing Turonian–Santonian ecosystems, and the  
31 relatively sparse record of dinosaurs from the eastern portion of the continent, present persistent  
32 challenges for studies of North American dinosaur evolution. Here we describe an assemblage of  
33 ornithomimosaurian materials from the Santonian Eutaw Formation of Mississippi.  
34 Morphological data coupled with osteohistological growth markers suggest the presence of two  
35 taxa of different body sizes, including one of the largest ornithomimosaurians known worldwide.  
36 The regression predicts a femoral circumference and a body mass of the Eutaw individuals similar  
37 to or greater than that of large-bodied ornithomimosaur, *Beishanlong grandis* and *Gallimimus*  
38 *bullatus*. The paleohistology of MMNS VP-6332 demonstrates that the individual was at least 11  
39 years of age (similar to *B. grandis* [~375 kg, 13–14 years old at death]). Additional pedal  
40 elements share some intriguing features with ornithomimosaur yet suggest a larger-body size  
41 closer to *Deinocheirus mirificus*. The presence of a large-bodied ornithomimosaur in this region  
42 during this time is consistent with the relatively recent discoveries of early-diverging, large-  
43 bodied ornithomimosaur from mid-Cretaceous strata of Laurasia (*Arkansaurus fridayi* and *B.*  
44 *grandis*). The smaller Eutaw taxon is represented by a tibia preserving seven growth cycles, with  
45 osteohistological indicators of decreasing growth, yet belongs to an individual with near reaching  
46 somatic maturity of the larger taxon, suggesting the co-existence of medium- and large-bodied  
47 ornithomimosaur taxa during the Late Cretaceous Santonian of North America. The Eutaw  
48 ornithomimosaur materials provide key information on the diversity and distribution of North

49 American ornithomimosaur and Appalachian dinosaurs and fit with broader evidence of multiple  
50 cohabiting species of ornithomimosaurian dinosaurs in Late Cretaceous ecosystems of Laurasia.

51

52 **Keywords:** Eutaw Formation; Body-size evolution; Paleobiogeography; Ornithomimosauria;  
53 Theropod; Coexistence

54

55

56

57

58

59

60

61

62

63

64

65

66

67

68

69

## 70 **Introduction**

71           During the majority of the Late Cretaceous, the southern North American continent was  
72 divided into two landmasses by the expansion of the Western Interior Seaway, forming Laramidia  
73 to the west and Appalachia to the east (e.g., [1–3]). Continental separation had appreciable  
74 consequences for the evolution of North American dinosaurs, with distinct lineages evolving in  
75 isolation on each landmass [4]. Although the vertebrate fossil record of Appalachia suggests a  
76 distinct and diverse fauna [5,6], the majority of this record is based on relatively poorly preserved,  
77 and often isolated specimens, when compared to the more extensive record of Laramidian taxa  
78 [7,8]. This is due, in part, to preservational and collection biases, as the vast majority of the  
79 exposed sedimentary units in Appalachia represent marine deposits [9,10] and preserved fossils of  
80 terrestrial taxa are often fragmentary [5,6]. Thus, the dinosaur fossil record of Appalachia is poor  
81 when compared to the extensive record of terrestrial fluvial and coastal plain deposits in  
82 Laramidia. Nonetheless, knowledge of the Mesozoic terrestrial fauna of eastern North America is  
83 rapidly growing. From these often-isolated elements, researchers have been able to piece together  
84 a diverse Appalachian vertebrate fauna represented by hadrosauroids, ceratopsids, and theropods  
85 [11–17]. These discoveries have greatly strengthened our understanding of the evolution,  
86 biodiversity, and paleoecology of the Appalachian dinosaur fauna [3,10,11,13,17–22]. Yet much  
87 remains to be learned. One group with particularly poor representation is maniraptoriform  
88 theropods. Maniraptoriforms represented in Appalachian assemblages include dromaeosaurids  
89 and ornithomimosaur (e.g., [15,22,23]).

90           Ornithomimosaur are lightly built theropod dinosaurs characterized by long fore limbs,  
91 powerful hind limbs and relatively small skulls that exhibit reduced teeth to fully edentulous  
92 beaks [24–26]. Although the clade is well represented in the Upper Cretaceous deposits  
93 (Campanian-Maastrichtian) of the Western Interior of North America [24,25], the fossil record is

94 relatively rare in more older eastern North American localities [6,26,27]. A recent review of the  
95 fossil record from this subcontinent cited several ornithomimosaur specimens described during  
96 the last decade; however, most of these specimens are too fragmentary to be diagnosed to species  
97 level [23,28]. These include associated vertebrae and isolated elements of the hind limb from the  
98 Lower Cretaceous Arundel Clay (Potomac Formation) of Maryland [15,29], which are  
99 undiagnostic at finer taxonomic levels [30]. Recent new description of an early-diverging  
100 ornithomimosaur taxon, *Arkansaurus fridayi*, from Arkansas [14] represents an exception to this  
101 pattern; however, *A. fridayi* predates the isolation of Appalachia and Laramidia and cannot  
102 therefore inform us on the impact of isolation on the evolution of eastern North American  
103 dinosaurs. Moreover, the near absence of body fossil records of ornithomimosaur dinosaurs  
104 across the whole of North America (including both Laramidia and Appalachia) continent from the  
105 Cenomanian to the Campanian (a gap of ~10 Myrs.), is currently obscuring the  
106 macroevolutionary history and paleobiogeography of ornithomimosaur dinosaurs more broadly on this  
107 continent.

108         Here, we describe multiple specimens of ornithomimosaurian dinosaur from the Santonian  
109 Eutaw Formation, assembled by the Mississippi Museum of Natural Science, from Lowndes  
110 County, Mississippi, in a limited exposure along Luxapallila Creek (Fig 1). The Eutaw  
111 ornithomimosaur materials represent individuals of different body sizes, therefore we test for the  
112 presence of multiple taxa using osteohistological interpretations. We then discuss the implications  
113 of these specimens on our understanding of ornithomimosaur body size evolution and diversity.

114

115 **Fig 1. Geographic and stratigraphic occurrence of the Eutaw ornithomimosaur's**

116 **assemblage.** Geologic map of Lowndes County with red arrow showing location of fossil site. A

117 simplified geologic key is provided with placement of the Santonian-Campanian boundary in

118 Mississippi based on Dowsett [31], Kennedy & Cobban [32], Mancini et al. [33], and Puckett  
119 [34].

120

121

## 122 **Materials and Methods**

### 123 **Specimens**

124 **The elements referable to large-bodied ornithomimosaur** - Incomplete astragalus  
125 (MMNS VP-8826); a nearly complete, pathologic second metatarsal (MMNS VP-6332, MT-II);  
126 distal halves of the third (MSC 13139, MT-III) and the fourth (MMNS VP-6183, MT-IV)  
127 metatarsals; pedal phalanges MMNS VP-4955 (PII-1), 9444 (PII-1), 4949 (PIII-1), and 7119  
128 (PIV-2).

129 **The elements referable to medium-bodied ornithomimosaur** - Partial dorsal centra  
130 (MMNS VP-113 and MMNS VP-6120); incomplete posterior caudal centrum (MMNS VP-6329);  
131 complete manual phalanx (MMNS VP-6419, PIII-1); complete manual ungual (MMNS VP-  
132 2963); and incomplete tibial shaft (MMNS VP-7649). These elements are described and figured  
133 in the supplementary information.

134

### 135 **Osteohistological thin-sectioning**

136 A total of three osteohistological thin-sections were made from the tibia (MMNS VP-  
137 7649) and the second metatarsal (MMNS VP-6332). These elements represent two different  
138 individuals based on relative size. The sections of MMNS VP-6332 were taken from the  
139 proximal- and the mid-shaft, whereas only the mid-shaft of MMNS VP-7649 was sectioned from  
140 the specimen. Prior to consumptive sampling, thin-sectioned specimens were photographed,

141 measured, molded, and cast. These thin-sections were cut using a Ryobi tile saw (model  
142 WS750L) before embedded and affixed to plexiglass slides using a clear epoxy resin (EPO-TEK  
143 301) and cut with a Buehler Isomet 1000 diamond wafer blade, low-speed precision saw. The  
144 grinding/polishing processes (down to a thickness of approximately 50-60  $\mu\text{m}$ ) were done on a  
145 Hillquist thin-section machine and Buehler Metaserv-250 grinder and polishing machine using a  
146 series of abrasive paper disks with increasing grit sizes (400, 800, 1200), and a microcloth. All  
147 prepared thin-sections were examined using a Nikon Eclipse Ci Pol polarizing microscope and  
148 photographed with a Keyence VHX-5000 microscope. All thin-sections were made in the  
149 histological facility of the Paleontological Research Laboratory, North Carolina Museum of  
150 Natural Sciences, using standard paleo-osteohistological methods [35].

151

## 152 **Body mass estimates**

153 To estimate the body masses of two of the largest individuals (MMNS VP-6332 and  
154 MMNS VP-7119), and the one smaller individual (MMNS VP-7649) from our sample, we  
155 performed ordinary least squares (OLS) linear regressions to predict a femoral circumference  
156 (FC) from original measurements of ornithomimosaurian elements (FC – pedal phalanx IV-2  
157 length, FC - metatarsal II length, and FC - tibia length). The bauplan of *Deinocheirus mirificus* is  
158 unusual among ornithomimosaurians. Skeletal ratios of *D. mirificus* are outliers in our dataset and  
159 had a pronounced effect on estimated FC. Given also that the phylogenetic relationships of the  
160 Eutaw taxa are unknown, we chose to predict a range of FC (and therefore masses) for MMNS  
161 VP-6332, MMNS VP-7119, and MMNS VP-7649 using datasets that both include and exclude *D.*  
162 *mirificus*. All measurement and estimation data related to these analyses are presented in S1  
163 Table, with regression results displayed in S1 Figure. We used the R package ‘MASSTIMATE’  
164 [36], based on extant scaling relationships between FC and BM and modified for use with bipeds

165 (cQE; Campione et al. [43]), to estimate body mass (BM) from FC. Masses of smaller/juvenile  
 166 individuals were estimated by applying the ‘developmental mass extrapolation’ (DME) approach  
 167 of Erickson and Tumanova [38] to the estimated femoral circumference values of smaller  
 168 specimens and the femoral circumference and body mass values of large/adult specimens (*sensu*  
 169 Chiba 2018) (S2 Table).

170

171

172 **S1 Table. Measurement comparisons of the select pedal elements of ornithomimosaur.** Note

173 that a single asterisk (\*) indicates the measurements including *Deinocheirus mirificus*, and

174 a double asterisk (\*\*) indicate the measurements excluding *Deinocheirus mirificus*.

| Species                             | Specimen #    | Pedal phalanx IV-2 Length | Metatarsal II Length | Tibia Length | Femur circumference (FC) |
|-------------------------------------|---------------|---------------------------|----------------------|--------------|--------------------------|
| <i>Anserimimus planinychus</i>      | MPC-D100/300  | 17                        | 270                  | 450          | 134                      |
| <i>Archaeornithomimus asiaticus</i> | AMNH 6570     | -                         | 274                  | 301          | 46                       |
| <i>Deinocheirus mirificus</i>       | MPC-D 100/127 | 64                        | 510                  | 1140         | 560                      |
| <i>Dromiceiomimus brevitertius</i>  | AMNH 5201     | 20                        | -                    | 438          | 103                      |
| <i>Dromiceiomimus brevitertius</i>  | ROM 797       | 30                        | 253                  | 470          | 99                       |
| <i>Dromiceiomimus brevitertius</i>  | ROM 852       | 29                        | 325                  | 520          | 128                      |
| <i>Dromiceiomimus brevitertius</i>  | UALVP 16182   | -                         | 305                  | 473          | 131                      |
| <i>Gallimimus bullatus</i>          | MPC-D100/10   | 13                        | 144                  | 218          | 54                       |
| <i>Gallimimus bullatus</i>          | MPC-D100/11   | 43                        | 480                  | 695          | 195                      |
| <i>Gallimimus bullatus</i>          | MPC-D100/12   | -                         | 330                  | 508          | 160                      |
| <i>Gallimimus bullatus</i>          | MPC-D100/52   | 11                        | 256                  | 400          | 128                      |
| <i>Gallimimus bullatus</i>          | MPC-D100/121  | 23                        | 278                  | 450          | 130                      |
| <i>Gallimimus bullatus</i>          | MPC-D100/123  | 31                        | -                    | 695          | 180                      |
| <i>Gallimimus bullatus</i>          | MPC-D100/138  | 29                        | 458                  | 685          | 165                      |
| <i>Gallimimus bullatus</i>          | ZPal MgD-I/1  | 17                        | 264                  | 384          | 109                      |
| <i>Gallimimus bullatus</i>          | ZPal MgD-I/32 | 22                        | -                    | -            | 133                      |
| <i>Gallimimus bullatus</i>          | ZPal MgD-I/94 | 19                        | 205                  | 292          | 76                       |



|                                  |                     |    |     |     |          |
|----------------------------------|---------------------|----|-----|-----|----------|
| <i>Ornithomimidae</i>            | MPC-D100/8          | 29 | -   | -   | 115      |
| <i>Ornithomimidae</i>            | MPC-D100/136        | 13 | -   | -   | 100      |
| <i>Garudimimus brevipes</i>      | MPC-D100/13         | 35 | 195 | 388 | 107      |
| <i>Ornithomimus edmontonicus</i> | ROM 851             | 29 | 265 | 475 | 110      |
| <i>Ornithomimus edmontonicus</i> | TMP 95.110.1        | 22 | 297 | 465 | 125      |
| <i>Struthiomimus altus</i>       | AMNH 5257           | 31 | 342 | 555 | 160      |
| <i>Struthiomimus altus</i>       | AMNH 5375           | -  | 357 | 408 | 141      |
| <i>Struthiomimus altus</i>       | UCMZ (VP) 1980.1    | 27 | -   | 556 | 136      |
| <i>Rativates evadens</i>         | ROM 1790            | 20 | 277 | 421 | 111      |
| <b>Eutaw ornithomimosaur</b>     | <b>MMNS VP-6332</b> | -  | 435 | -   | 252.09*  |
|                                  |                     | -  | 435 | -   | 174.68** |
| <b>Eutaw ornithomimosaur</b>     | <b>MMNS VP-7649</b> | -  | -   | 506 | 146.45*  |
|                                  |                     | -  | -   | 506 | 133.13** |
| <b>Eutaw ornithomimosaur</b>     | <b>MMNS VP-7119</b> | 92 | -   | -   | 606.87*  |
|                                  |                     | 92 | -   | -   | 289.09** |

175

176

177

178 **S2 Table. Body mass estimates for ornithomimosaur.** Note that a single asterisk (\*) indicates

179 the values when *D. mirificus* is included, and double asterisk (\*\*) indicate the values when

180 *Deinocheirus mirificus* is excluded in the analysis. Abbreviations: (cQE), the corrected

181 quadrupedal values for biped; (DME), developmental mass extrapolation; (FC), femoral

182 circumference.

| Species names                       | Specimen #         | FC  | LOG10 FC | log.cQE | cQE     | lower.cQE | upper.cQE | cQE kg  | cQE log kg | lower.cQE kg | upper.cQE kg | DME kg | DM E log kg |
|-------------------------------------|--------------------|-----|----------|---------|---------|-----------|-----------|---------|------------|--------------|--------------|--------|-------------|
| <i>Anserimimus planinychus</i>      | MPC-D 100/300      | 134 | 2.13     | 5.16    | 143607  | 106800.8  | 180414    | 143.61  | 2.16       | 106.8008     | 180.414      |        |             |
| <i>Archaeornithomimus asiaticus</i> | AMNH 6570          | 47  | 1.67     | 3.91    | 8061    | 5994.6    | 10126     | 8.06    | 0.91       | 5.9946       | 10.126       | 6.04   | 0.78        |
| <i>Archaeornithomimus asiaticus</i> | AMNH 6570          | 104 | 2.02     | 4.85    | 71547   | 53209.4   | 89884     | 71.55   | 1.85       | 53.2094      | 89.884       | 65.48  | 1.82        |
| <i>Arkansaurus fridayi</i>          | 74-16-3 - 5        | 191 | 2.28     | 5.58    | 380475  | 282959.5  | 477991    | 380.48  | 2.58       | 282.9595     | 477.991      |        |             |
| <i>Beishanlong grandis</i>          | FRDC-GJ (06) 01-18 | 190 | 2.28     | 5.57    | 375024  | 278905.6  | 471143    | 375.02  | 2.57       | 278.9056     | 471.143      |        |             |
| <i>Deinocheirus mirificus</i>       | MPC-D 100/127      | 560 | 2.73     | 6.88    | 6357653 | 4728186.4 | 798719    | 6357.65 | 3.8        | 4728.1864    | 7987.119     |        |             |

|                                    |                          |                  |      |      |              |              |              |              |                 |          |               |                     |                     |
|------------------------------------|--------------------------|------------------|------|------|--------------|--------------|--------------|--------------|-----------------|----------|---------------|---------------------|---------------------|
| <i>Dromiceiomimus brevitertius</i> | AMNH 5201                | 103              | 2.01 | 4.84 | 69672        | 51814.7      | 87528        | 69.67        | 1.84            | 51.8147  | 87.52<br>8    | 65.59               | 1.82                |
| <i>Dromiceiomimus brevitertius</i> | UALVP 16182              | 131              | 2.12 | 5.13 | 13494<br>1   | 100355.<br>8 | 16952<br>7   | 134.9<br>4   | 2.13            | 100.3558 | 169.5<br>27   |                     |                     |
| <i>Dromiceiomimus brevitertius</i> | ROM 797                  | 99               | 1.99 | 4.79 | 61620        | 45826.8      | 77413        | 61.62        | 1.79            | 45.8268  | 77.41<br>3    | 57.36               | 1.76                |
| <i>Dromiceiomimus brevitertius</i> | ROM 852                  | 128              | 2.11 | 5.1  | 12661<br>5   | 94163.7      | 15906<br>7   | 126.6<br>2   | 2.1             | 94.1637  | 159.0<br>67   |                     |                     |
| <i>Gallimimus bullatus</i>         | MPC-D<br>100/10          | 54               | 1.73 | 4.07 | 11806        | 8780.4       | 14832        | 11.81        | 1.07            | 8.7804   | 14.83<br>2    | 8.55                | 0.93                |
| <i>Gallimimus bullatus</i>         | MPC-D<br>100/11          | 195              | 2.29 | 5.61 | 40278<br>3   | 299549.<br>6 | 50601<br>6   | 402.7<br>8   | 2.61            | 299.5496 | 506.0<br>16   |                     |                     |
| <i>Gallimimus bullatus</i>         | MPC-D<br>100/12          | 160              | 2.2  | 5.37 | 23382<br>5   | 173895.<br>9 | 29375<br>5   | 233.8<br>3   | 2.37            | 173.8959 | 293.7<br>55   | 222.5               | 2.35                |
| <i>Gallimimus bullatus</i>         | MPC-D<br>100/52          | 128              | 2.11 | 5.1  | 12661<br>5   | 94163.7      | 15906<br>7   | 126.6<br>2   | 2.1             | 94.1637  | 159.0<br>67   | 113.9<br>2          | 2.06                |
| <i>Gallimimus bullatus</i>         | MPC-D<br>100/121         | 130              | 2.11 | 5.12 | 13212<br>8.3 | 98263.8      | 16599<br>2.8 | 132.1<br>283 | 2.1209<br>95847 | 98.2638  | 165.9<br>928  | 119.3<br>42222<br>2 | 2.07<br>6794<br>12  |
| <i>Gallimimus bullatus</i>         | MPC-D<br>100/123         | 180              | 2.26 | 5.51 | 32322<br>9   | 240385.<br>1 | 40607<br>2   | 323.2<br>3   | 2.51            | 240.3851 | 406.0<br>72   | 316.8               | 2.5                 |
| <i>Gallimimus bullatus</i>         | MPC-D<br>100/138         | 165              | 2.22 | 5.41 | 25446<br>5.6 | 189246.<br>1 | 31968<br>5.1 | 254.4<br>656 | 2.4056<br>2908  | 189.2461 | 319.6<br>851  | 244.0<br>14647<br>2 | 2.38<br>7415<br>896 |
| <i>Gallimimus bullatus</i>         | ZPal MgD-<br>I/94        | 76               | 1.88 | 4.48 | 30208        | 22465.7      | 37950        | 30.21        | 1.48            | 22.4657  | 37.95         | 23.85               | 1.38                |
| <i>Gallimimus bullatus</i>         | ZPal MgD-I/1             | 109              | 2.04 | 4.91 | 81405        | 60540.9      | 10226<br>9   | 81.41        | 1.91            | 60.5409  | 102.2<br>69   | 70.35               | 1.85                |
| <i>Garudimimus brevipes</i>        | MPC-D<br>100/13          | 107              | 2.03 | 4.89 | 77365        | 57536        | 97193        | 77.36        | 1.89            | 57.536   | 97.19<br>3    |                     |                     |
| <i>Harpymimus okladnikov</i>       | MPC-D<br>100/29          | 135              | 2.13 | 5.17 | 14657<br>3   | 109006.<br>2 | 18413<br>9   | 146.5<br>7   | 2.17            | 109.0062 | 184.1<br>39   |                     |                     |
| <i>Ornithomimus edmontonicus</i>   | TMP 95.110.1             | 125              | 2.1  | 5.07 | 11862<br>4   | 88220.4      | 14902<br>7   | 118.6<br>2   | 2.07            | 88.2204  | 149.0<br>27   | 114.2<br>9          | 2.06                |
| <i>Ornithomimus edmontonicus</i>   | ROM 851                  | 110              | 2.04 | 4.92 | 83475        | 62080.1      | 10486<br>9   | 83.47        | 1.92            | 62.0801  | 104.8<br>69   | 77.88               | 1.89                |
| <i>Ornithomimus edmontonicus</i>   | ROM 1790                 | 111              | 2.05 | 4.93 | 85577        | 63643.8      | 10751<br>1   | 85.58        | 1.93            | 63.6438  | 107.5<br>11   |                     |                     |
| <i>Struthiomimus altus</i>         | AMNH 5257                | 160              | 2.2  | 5.37 | 23382<br>5   | 173895.<br>9 | 29375<br>5   | 233.8<br>3   | 2.37            | 173.8959 | 293.7<br>55   |                     |                     |
| <i>Struthiomimus altus</i>         | AMNH 5385                | 98               | 1.99 | 4.78 | 60764        | 45190.2      | 76338        | 60.76        | 1.78            | 45.1902  | 76.33<br>8    | 53.73               | 1.73                |
| <i>Struthiomimus altus</i>         | AMNH 5375                | 141              | 2.15 | 5.22 | 16518<br>4   | 122847.<br>6 | 20752<br>1   | 165.1<br>8   | 2.22            | 122.8476 | 207.5<br>21   | 160.0<br>3          | 2.2                 |
| <i>Struthiomimus altus</i>         | UCMZ (VP)<br>1980.1      | 136              | 2.13 | 5.17 | 14957<br>7   | 111240.<br>3 | 18791<br>3   | 149.5<br>8   | 2.17            | 111.2403 | 187.9<br>13   | 143.6               | 2.16                |
| <b>Eutaw ornithomimosaur</b>       | <b>MMNS VP-<br/>6332</b> | 252<br>.09<br>*  | 2.4  | 5.91 | 81590<br>9.8 | 606792.<br>1 | 10250<br>28  | 815.9<br>098 | 2.9116<br>4215  | 606.7921 | 1025.<br>028  | 654.4<br>5          | 2.82                |
|                                    |                          | 174<br>.68<br>** | 2.24 | 5.47 | 29764<br>0.6 | 221355.<br>3 | 37392<br>5.9 | 297.6<br>406 | 2.4736<br>92171 | 221.3553 | 373.9<br>259  | 262.2<br>9          | 2.42                |
| <b>Eutaw ornithomimosaur</b>       | <b>MMNS VP-<br/>7119</b> | 606<br>.87<br>*  | 2.78 | 6.96 | 91305<br>24  | 679037<br>1  | 11470<br>678 | 9130.<br>524 | 3.9604<br>95702 | 6790.371 | 11470<br>.678 | N/A                 |                     |
|                                    |                          | 289<br>.09<br>** | 2.46 | 6.08 | 11889<br>01  | 884185.<br>5 | 14936<br>16  | 1188.<br>901 | 3.0751<br>45692 | 884.1855 | 1493.<br>616  | N/A                 |                     |
| <b>Eutaw ornithomimosaur</b>       | <b>MMNS VP-<br/>7649</b> | 146<br>.45<br>*  | 2.17 | 5.26 | 18333<br>5.2 | 136346.<br>4 | 23032<br>4   | 183.3<br>352 | 2.2632<br>45857 | 136.3464 | 230.3<br>24   | 128.3<br>1          | 2.11                |
|                                    |                          | 133<br>.13<br>** | 2.12 | 5.15 | 14105<br>8.8 | 104905.<br>4 | 17721<br>2.2 | 141.0<br>588 | 2.1494<br>00185 | 104.9054 | 177.2<br>122  | 116.1<br>1          | 2.06                |

183

## 184 Geological Setting & Locality Information

185           The Upper Cretaceous strata of the Eutaw Group are exposed in northeastern Mississippi  
186 as part of an outcrop belt that extends from west-central Georgia, through central Alabama, and  
187 into western Tennessee by way of northeastern Mississippi [39] (Fig 1). Within Mississippi and  
188 western Alabama, the Eutaw Group, in ascending superposition, comprises the McShan  
189 Formation, the lower, unnamed member of the Eutaw Formation, and the Tombigbee Sand [40]  
190 (Fig 2A). The contact of the Tombigbee Sand with the lower Eutaw is represented by an erosional  
191 unconformity and begins a major transgressive depositional sequence with the former succeeded  
192 by the Mooreville Formation [33,39,40]. Although the Tombigbee is very distinct from the lower  
193 Eutaw in both lithologic and sequence stratigraphic terms [33,40,41], it has long been relegated to  
194 a member of the Eutaw Formation by most stratigraphic works. The Tombigbee-Mooreville  
195 contact is diachronous, dating to the earliest Campanian in east-central Mississippi and Santonian  
196 eastward into central Alabama [31,32] (Fig 2A). Biostratigraphic and radiometric analyses have  
197 yielded ages of late Santonian through earliest Campanian for the Tombigbee Sand in north  
198 Mississippi (e.g., [32,33,42]). The lower Eutaw Formation falls within the *Dicarinella concavata*  
199 interval zone, and the lowest portions of this unit extend into the Coniacian [34]. The lower  
200 Eutaw is interpreted as a complex of regressive facies immediately preceding the Tombigbee-  
201 Mooreville transgressive beds [33].

202

203 **Fig 2. Temporally calibrated chart of Ornithomimosauria, showing the continental**  
204 **distribution of the known taxa and binned body mass. (A)** General stratigraphic column of the  
205 Cretaceous Period, showing the global distribution of ornithomimosaur taxa divided by continents  
206 (inset stratigraphic column shows the local stratigraphy of Mississippi County, where the Eutaw  
207 ornithomimosaur was discovered); **(B)** The Eutaw ornithomimosaurian taxa are indicated by a  
208 green pentagon. Colored circles refer to the different body mass of ornithomimosaur taxa: yellow

209 circles indicate small-bodied ornithomimosaur (3.58 kg - 34.78 kg), orange circles indicate  
210 medium-bodied ornithomimosaur (60.76 kg – 233.83 kg), and green circles indicate large-bodied  
211 ornithomimosaur (>380.48 kg). The figure is modified from Hunt and Quinn [14].

212

213

214 All specimens described herein were recovered from two locations—MS.44.001a (to the  
215 south) and MS.44.001b (to the north)—1.3 km apart in the same stratigraphic interval within the  
216 upper part of the lower Eutaw Formation exposed along a channelized length of Luxapallila  
217 Creek in Columbus, Lowndes County, Mississippi (Fig 1). The macrofossil-bearing bed within  
218 the Luxapallila section (MS.44.001) is a relatively thin (typically 20-90 cm thick) condensed zone  
219 of fine-sandy clay containing a variety of coarse components at its base and fining upwards.  
220 Composition of the basal lag, coined the “Lux lag” [43] includes bones, teeth, vertebrate  
221 coprolites, moldic invertebrates, lignitized wood, phosphatized wood (reworked), sundry  
222 phosphatized rounded and frequently flattened pebbles, rare exotic clasts, and regularly occurring  
223 claystone rip-ups from the indurated surface on which it rests. Along the exposed section, this  
224 macrofossiliferous condensed zone is typically bounded above and below by thinly laminated,  
225 occasionally rippled, lignitic clays, although immediately subjacent to the fossil bed at  
226 MS.44.001b is a suite of cross-bedded and flaser-bedded clean sands with lignitic interlaminae  
227 and regularly occurring burrows (including *Ophiomorpha*). These bounding beds are typical of  
228 the lower Eutaw [39,44,45] and, to some extent, the McShan [46,47]. Although the exposed  
229 section of MS.44.001 has not yielded useful standardized index fossils, like ammonites and  
230 nanofossils, the late Santonian age of the vertebrate-bearing interval is reasonably  
231 straightforward from both its relative stratigraphic position below ( $\geq 10$  m) the typical Tombigbee  
232 lithology to the south and west [39,44] and ichthyofaunal species composition [43,48,49].

233           A similar described section to that bearing the Lux lag occurs almost 30 km to the north  
234 along strike, where a vertebrate-rich bed in the upper part of the lower Eutaw lies well below the  
235 typical Tombigbee Sand [45]. Even further northward along strike, some workers have ascribed a  
236 dinosaur-bearing lithofacies to the subjacent McShan Formation [1,42]. Some workers have  
237 ascribed a dinosaur-bearing lithofacies, even further northward along strike, to the McShan  
238 Formation [1,42], but the ephemeral exposure was not available for detailed study and is  
239 interpreted here as stratigraphically equivalent to the lower Eutaw in the Columbus area. To the  
240 east and northeast, marginal marine lithofacies attributable to the McShan have been reported by  
241 Cook [46], although they notably lack burrowing, the presence of which is characteristic of the  
242 Tombigbee Sand to the south and west of MS.44.001 but also the aforementioned sand beds in the  
243 vicinity of the upstream fossil locality. The McShan Formation was erected by Monroe et al. [47],  
244 who separated and distinguished it from the superjacent Eutaw by a regional unconformity with a  
245 pebbly bed containing shark teeth in the basal portion of the latter. Although this coarse clastic  
246 basal Eutaw bed was studied primarily in western Alabama [47], it is readily correlate to the Lux  
247 lag. As the McShan Formation is often indistinguishable in subsurface analyses, its usage has  
248 been abandoned by many workers, who treat the unit as part of the lower Eutaw [33,50].

249           Vertebrate fossils from the Lux lag at MS.44.001 were first documented by Kaye [44]  
250 who reported shark teeth only and also described the interval as below the typical Tombigbee  
251 Sand or within a “transitional zone”. The general diversity of vertebrate remains was first  
252 reported, without details, by Phillips & Loftis [51], but a selachian assemblage and lungfish tooth  
253 plate were described at length by Cicimurri et al. [43] and Harrell & Ehret [52], respectively. The  
254 vertebrate species represented at this site consist of an ecologically disparate mix of various  
255 marine, brackish, freshwater, and even terrestrial taxa [43,52]. Typical of lag concentrations,  
256 skeletal dissociation is high. Marine fish remains are the most common vertebrate constituents of

257 the Lux lag, whereas crocodylian and chelonian remains occur with lesser frequency. Rarer still  
258 are the remains of plesiosaur, mosasaur, and dinosaur, although the incidence of dinosaur bone  
259 (mostly fragmentary) outnumbers that of the marine reptiles. The dinosaurian assemblage from  
260 MS.44.001 is perhaps the most significant component of the fauna because it is richer in total  
261 individual remains than any other Mississippi site, particularly given the limited size of the  
262 exposure. The Lux lag contains a diverse dinosaurian assemblage, at least for marginal marine  
263 facies; it includes the fragmentary remains of hadrosaur, nodosaur, and a variety of theropods.  
264 **Taphonomy** - The thin, regionally extensive Lux lag is a temporally and environmentally  
265 constrained interval within the regressive (lowstand) beds of the lower Eutaw Formation [33].  
266 Monroe et al. [47] erected the McShan, in part, due to a coarse, fossiliferous facies he identified  
267 regionally in the base of the lower Eutaw (sensu stricto). Although Mancini et al. [33] did not  
268 incorporate this facies change at the McShan-Eutaw contact in their regional sequence  
269 stratigraphic model, they seemed to confine it to a relatively narrow temporal interval (Santonian)  
270 and depositional environment (estuarine). This point is crucial to the discussion about the relative  
271 coexistence of component taxa, especially the theropod dinosaurs—the subject of this paper. The  
272 dinosaurian elements, as is the case with basically all the observed phosphatized vertebrate clasts  
273 within the Lux lag, are inseparable as to related degrees of surface erosion. Large fragmentary  
274 bone dominates the dinosaurian component of the assemblage, but the gradual accumulation of  
275 more complete elements over ~25 years (following stream channelization) have made the current  
276 project possible.

277 As previously discussed, close proximity of the superjacent, well-dated Tombigbee Sand  
278 allows a minimum age of late Santonian for the Lux lag. The lack of a bone-bearing subjacent  
279 facies as a potential clast-contributor to the Lux lag suggests temporal mixing is minimal to  
280 nonexistent, unless of course any vertebrate-bearing facies were removed earlier in the lowstand.

281 Any reworking of older clast constituents from such hypothetical earlier Eutaw fossil beds could  
282 have introduced Coniacian (or older) elements. However, the assessment of the selachian  
283 assemblage [43] produced no elements that were strictly pre-Santonian, and the marine faunal  
284 character was essentially identical to that of better dated marine vertebrate assemblages nearby  
285 [48]. In addition, no pre-Santonian bone beds have been identified in the Upper Cretaceous of the  
286 region.

287         Formation of the Lux lowstand lag is beyond the scope of this study, but its ecological  
288 content is very revealing. The component taxa represent a mixture of paralic and very shallow  
289 marine vertebrate components. The proximity of fluvio-riparian habitats is suggested by the  
290 dinosaurs, lungfish [52], and kinosternoid turtles (work in progress); estuarine habitats by  
291 *Atractosteus*, crocodylian, and hybodont shark remains; and marine origins for the remainder of  
292 the aquatic taxa, mostly fishes. However, deep-water marine taxa are notably rare. Pelagic forms,  
293 like mosasaurs, plesiosaurs, and the ginsu shark *Cretoxyrhina* are exceptionally scarce  
294 occurrences. Several of the selachian taxa that are otherwise also common in deeper neritic  
295 environments are frequently represented in the Lux lag by juvenile remains, as in the relative  
296 abundance of early ontogenetic stages of goblin shark (*Scapanorhynchus*) and myliobatid ray  
297 (*Brachyrhizodus*) teeth [43]. Most selachians are born and raised in coastal marshes and estuaries  
298 [53], thus their relative abundance in the Lux lag suggests an equivalent depositional  
299 environment. The sedimentology of the lower Eutaw Group (i.e. McShan) further supports an  
300 estuarine complex [33,46]. Thus, although the geographic scope of this mixed assemblage is  
301 seemingly diverse, the assemblage is actually confined to area of overlapping coastal ecosystems  
302 and within a relatively narrow chronostratigraphic interval, making a compelling case for the  
303 coexistence of its dinosaurian elements.

304



## 305 **Institutional Abbreviations**

306 **AM**, Albany Museum, Grahamstown, South Africa; **AMNH**, American Museum of  
307 Natural History, New York City, NY, USA; **ANSP**, Academy of Natural Sciences, Philadelphia,  
308 PA, USA; **BENC**, Benemérita Escuela Normal de Coahuila, Mexico; **BMRP**, Burpee Museum of  
309 Natural History, Rockford, IL, USA; **CMN**, Canadian Museum of Nature, Ottawa, Ontario,  
310 Canada; **FMNH PR**, Field Museum of Natural History, Chicago, IL, USA; **FRDC-GJ**, Fossil  
311 Research and Development Center, Third Geology and Mineral Resources Exploration Academy,  
312 Gansu Provincial Bureau of Geo-Exploration and Mineral Development, Lanzhou, China; **HGM**,  
313 Henan Geological Museum, Henan Province, China; **IVPP**, Institute of Vertebrate Paleontology  
314 and Paleoanthropology, Beijing, China; **LACM**, Los Angeles County Museum, LA, USA; **LH**,  
315 Long Hao Institute of Geology and Paleontology, Hohhot, China; **MMNS VP**, Mississippi  
316 Museum of Natural Science, MS, USA; **MOR**, Museum of the Rockies, Bozeman, MT, USA;  
317 **MPC-D**, Institute of Paleontology, Mongolian Academy of Sciences, Ulaanbaatar, Mongolia;  
318 **MSC**, McWane Science Center, Birmingham, AL, USA; **NCSM**, North Carolina Museum of  
319 Natural Sciences, Raleigh, NC, USA; **ROM**, Royal Ontario Museum, Toronto, ON, Canada;  
320 **TMP**, Royal Tyrrell Museum of Paleontology, Drumheller, AB, Canada; **RMM**, Red Mountain  
321 Museum, Birmingham, AL, USA; **SMU**, Southern Methodist University, Dallas, TX, USA;  
322 **YPM**, Yale Peabody Museum of Natural History, New Haven, CT, USA; **UAM**, University of  
323 Arkansas Museum, University of Arkansas, Fayetteville, AR, USA; **UCMZ (VP)**, University of  
324 Calgary Museum of Zoology, Calgary, Alberta, Canada; **UMNH VP**, Utah Museum of Natural  
325 History, Salt Lake City, UT, USA; **ZIN PH**, Paleo-herpetological Collection, Zoological Institute,  
326 Russian Academy of Sciences, Saint Petersburg, Russia; **ZPAL**, Institute of Paleobiology, Polish  
327 Academy of Sciences, Warsaw, Poland.

328



## 329 **Results**

### 330 **Systematic palaeontology**

331 Dinosauria Owen, 1842 [54]

332 Theropoda Marsh, 1881 [55]

333 Ornithomimosauria Barsbold, 1976 [56]

334 Ornithomimosauria indet.

335

### 336 Description

#### 337 **Astragalus**

338 An incomplete left astragalus (MMNS VP-8826) is preserved, missing its medial condyle  
339 and most of the ascending process, which is represented only by its base on the lateral side (Fig  
340 3). The preserved portion of the lateral condyle is spherical. Although the medial condyle is  
341 missing, enough anatomical information is present to determine in MMNS VP-8826 that the  
342 lateral condyle is more extensive anteriorly and the two condyles are separated by a well-  
343 developed intercondylar bridge (Fig 3E). The bridge of MMNS VP-8826 is not strongly  
344 developed as those of tyrannosauroids (e.g., *Dryptosaurus aquilunguis*) and troodontids (e.g.,  
345 *Talos sampsoni* and *Gobivenator mongoliensis*), which exhibit highly constricted round or V-  
346 shaped outlines of the intercondylar bridge between the lateral and medial condyles in proximal  
347 view (S2B and S2F Fig) [57,58]. The base of the ascending process of MMNS VP-8826 bears a  
348 shallow median fossa (Fig 3A, D). A shallow median fossa is unlike those of deeper median  
349 fossae of the tyrannosauroids *Appalachiosaurus montgomeriensis*, *D. aquilunguis*, and  
350 *Tyrannosaurus rex* (S2A1-C1 Fig), as well as the caenagnathoid *Caenagnathus collinsi* and the  
351 therizinosauroid *Falcarius utahensis* (S2D1-E1 Fig), but it resembles those of ornithomimosaur

352 (S2G1-I1 Fig). The horizontal groove is commonly present at the base of the ascending processes  
353 in some theropods, such as ornithomimosaur, tyrannosauroids, and troodontids (e.g., *T.*  
354 *sampsoni*), but it is completely absent in therizinosauroids (e.g., *F. utahensis*) [57,59], and the  
355 troodontids *G. mongoliensis* and *Sinornithoides youngi* [58]. A well-pronounced horizontal  
356 groove is partially preserved at the base of the preserved ascending process of MMNS VP-8826  
357 (Fig 3A, D). This groove is much shallower than those of the tyrannosauroid *A. montgomeriensis*  
358 and the troodontid *T. sampsoni* (S2F1 Fig) [11,57]. The contact surfaces for the articulation of the  
359 anterior and distal surfaces of the tibia are flat and straight in lateral and medial views like most  
360 theropod dinosaurs (Fig 3B, D). The base of the astragalar body is slightly constricted distally and  
361 nearly straight for the tibia's distal articulation in posterior view (Fig 3A-B). When articulated  
362 with the tibia, the distal end of the astragalar body would be seen in posterior view as in  
363 ornithomimosaur such as *Aepyornithomimus tugrikinensis*, *Ornithomimus velox*, and *Qiupalong*  
364 *henanensis* [60–62]. The portion of the astragalar body underlying the tibia (astragalar base) is  
365 dorsoventrally thick and laterally unflared of MMNS VP-8826 is consistent with the condition of  
366 ornithomimosaur (Fig 3B-D) and contrasts with that of tyrannosaurs such as *T. rex* (e.g., MOR  
367 1125 and FMNH PR 2081) [63], and *A. montgomeriensis* [11] (S2A2-C2 Fig).

368

369 **Fig 3. Left astragalus (MMNS VP-8826).** (A), anterior; (B), posterior; (C), lateral; (D), medial;  
370 (E), distal views. Interpretive illustration of *Q. henanensis* (HGM 41HIII-0106) shows the  
371 approximate location of the preserved portion of the astragalus. Abbreviations: alr, anterolateral  
372 ridge; asc, articular surface for the calcaneum; asf, articular surface for the fibula; ast, articular  
373 surface for the tibia; bap, base of the ascending process; fos, median fossa; hr, horizontal ridge;  
374 icb, intercondylar bridge; lc, lateral condyle; plr, posterolateral ridge; sluf, laterally unflared  
375 articular surface.

376

377

378           In MMNS VP-8826, the well-preserved articular surfaces of MMNS VP-8826 for the  
379 fibula and the calcaneum are smooth and concave and are separated by a weak horizontal ridge  
380 (Fig 3C). The fibular articular surface is restricted by prominent ridges anteriorly (anterolateral  
381 ridge) and posteriorly (posterolateral ridge), forming a posterolaterally facing anterior surface and  
382 anterolaterally facing posterior surface (Fig 3C). In anterior view, the anterolateral ridge is  
383 relatively vertically oriented (Fig 3A), compared to the ornithomimid *Q. henanensis* as well as  
384 those of tyrannosauroids (e.g., *A. montgomeriensis* and *T. rex* [MOR 1125]) (S2A1, S2C1, and  
385 S2G1 Fig), which slope medially forming a concave margin. Unlike the astragali of *Anzu* (NCSM  
386 33801), *T. rex* (MOR 1125), and *F. utahensis* (UMNH VP 12364) (S2A2, D2, and E2 Fig), there  
387 is no deep junction between the base of the ascending process and the lateral condyle of MMNS  
388 VP-8826 in lateral view (Fig 3C). MMNS VP-8826 lacks a well-developed notch centered on the  
389 anterolateral margin of the lateral condyle that is present on some ornithomimids (e.g., *G.*  
390 *bullatus*, *Q. henanensis* and large Gansu ornithomimid [46,50,51]), and to a lesser degree  
391 troodontids (e.g., *T. sampsoni*) and therizinosauroids (e.g., *F. utahensis*) (S2D1 and S2F1 Fig). In  
392 this respect, the condition of MMNS VP-8826 is similar to the ornithomimid *A. tugrikinensis* and  
393 caenagnathids like *Anzu wyliei* and *Gigantoraptor erlianensis* [66,67]. This notch is different  
394 from the notch on the anterolateral margin of the lateral condyle that is described in  
395 tyrannosauroids. Whereas the notch of the tyrannosauroid *D. aquilunguis* is more distally located  
396 on the lateral condyle, *A. montgomeriensis* exhibits a proximally located notch, which is absent on  
397 MMNS VP-8826 [11,68] (S2B3 and S2C2 Fig).

398           The border of the articular surface of calcaneum is convex anteriorly and straight  
399 anterodistally in lateral view (Fig 3C), similar in form to the tyrannosauroids *A. montgomeriensis*,

400 *D. aquilunguis* (S2B2-C2 Fig), and some ornithomimosaurids, such as *A. tugrikinensis* and *Q.*  
401 *henanensis* (S2G2-H2 Fig). However, it is different from caenagnathoids, therizinosauroids,  
402 troodontids, and tyrannosaurids. Whereas those of *T. rex* (MOR 1125) and *F. utahensis* exhibit a  
403 prominent sulcus anteriorly on the anterolateral margin of the astragalar body in relation to the  
404 horizontal groove on the anterior surface (S2A2 and S2D2 Fig), large-bodied caenagnathids, such  
405 as *C. collinsi* from the Dinosaur Park Formation and *Anzu* sp. (NCSM 33801), as well as the  
406 troodontid *T. sampsoni*, display a round outline of the calcaneal articular surface in lateral view  
407 (S2E2-F2 Fig) [57,69]. Moreover, the dorsoventrally thick and laterally unflared articular surface  
408 of the astragalar base of MMNS VP-8826 is not referable to the aforementioned theropod groups,  
409 such as the tyrannosauroids *A. montgomeriense*, *D. aquilunguis*, and *T. rex*, and therizinosauroid  
410 *F. utahensis* as well as *C. collinsi* (S2A2-D2 Fig). Furthermore, MMNS VP-8826 is also  
411 differentiated from these theropod groups by the absence of a deep juncture between the  
412 anterolateral ridge and the lateral condyle (S2A2 and S2D2-E2 Fig).

413 In short, the visibility of the astragalar body in posterior view, presence of a less  
414 constricted intercondylar bridge, shallow horizontal groove, absence of a laterally flaring  
415 astragalar base, well-developed notch on the anterolateral margin of the lateral condyle, and more  
416 vertically oriented anterior ridge of the fibular contact allows us to support an ornithomimosaur  
417 affinity and refute a tyrannosaur referral.

418

## 419 **Metatarsus**

420 Three metatarsals are represented in the Eutaw ornithomimosaur assemblage, including  
421 the second (MMNS VP-6332), third (MSC 13139), and fourth (MMNS VP-6183) metatarsals.  
422 These appear to belong to different individuals (Figs 4-6).

423

## 424 **The second metatarsal (MT-II)**

425 MMNS VP-6332 is essentially complete yet missing the proximal-most articular surface  
426 and most of the shaft is deformed due to a pathology (Fig 4A). MMNS VP-6332 is identified as a  
427 second metatarsal of the right foot based on the subtriangular proximal end with a nearly flat  
428 articular surface for the articulation of the third metatarsal, medially deviated distal end with a  
429 transversely unconstricted, quadrangular distal articular surface relative to its height, and a less  
430 flared medial condyle (Fig 4). Although MMNS VP-6332 is not complete, we used the length of  
431 the preserved portion of the metatarsal to estimate the length of the complete element at ~434  
432 mm. This estimate is similar in size to the second metatarsal of the large Gansu ornithomimid  
433 from China [65], ~17% longer than those of the Early Cretaceous ornithomimosaur *A. fridayi*  
434 and *Beishanlong grandis* [14,70], and more than twice the length of the geographically closest  
435 type specimen *O. velox* [61].

436

437 **Fig 4. Right second metatarsal (MMNS VP-6332).** (A), anterior; (B), posterior; (C), lateral;  
438 (D), medial; (E), proximal; (F), distal views. Abbreviations: asMTIII, articular surface for the  
439 third metatarsal; clf, collateral ligament fossa; ics, intercondylar sulcus; lc, lateral condyle; mc,  
440 medial condyle. (A, E, F) gross morphology of original bone; (B-D), 3D model of the metatarsal  
441 shows the original morphology of the shaft in dark gray and distribution of a pathology in light  
442 gray.

443

444

445 MMNS VP-6332 is proximodistally long and slender and the proximal two-thirds of the  
446 shaft is straight, with only ~20% of the distal articular caput deviating medially, similar to most  
447 ornithomimosaur (Fig 4A). The buttressing surface, which is located on the lateral surface of the

448 distal half of the second metatarsal, is one of the differentiating characteristics between  
449 ornithomimosaur and tyrannosauroids (e.g., [57–59]). Based on architecture of the non-  
450 pathological cortical bone periosteal surface segmented via CT reconstruction (Fig 4B-D), there is  
451 no evidence of the buttressing surface on MMNS VP-6332, indicating that this metatarsal is not  
452 referable to tyrannosauroids.

453 Proximally, MMNS VP-6332 is expanded anteroposteriorly and medially relative to the  
454 shaft as in most theropods (Fig 4A and D). However, this expansion is less than that of  
455 tyrannosauroids (S3 Fig) but closely resembles the condition of ornithomimosaur. The shaft just  
456 distal to the proximal end is not affected by pathology, preserving the original morphology of the  
457 shaft on gross inspection (Fig 4). The morphology of the proximal shaft is typical of  
458 ornithomimosaur, with a suboval cross-section (wider anteroposteriorly than mediolaterally),  
459 displaying flat lateral and posterior surfaces, and convex medial and anterior surfaces (Fig 4B)  
460 like *Dromiceiomimus brevitertius* and *Rativates evadens*, which also exhibit a similar flat surface  
461 on the posterior surface of the second metatarsal [74,75]. But it differs from the late-diverging  
462 ornithomimosaur taxa, such as *O. velox*, *G. bullatus*, and *Struthiomimus altus* as well as those of  
463 early-diverging ornithomimosaur *A. fridayi*, *B. grandis* and *Harpymimus okladnikovi*, which  
464 have a relatively convex posterior surface. Overall, the aspect of the proximal end indicates that  
465 MMNS VP-6332 is referable to a taxon with an arctometatarsalian foot condition [25,65], which  
466 is similar in morphology to the type specimen of *O. velox*, and a large Gansu ornithomimid  
467 [61,65,76]. Although both ornithomimosaur and tyrannosauroids exhibit an arctometatarsalian foot,  
468 the tyrannosauroids *A. montgomeriense*, *Bistahieversor sealeyi*, *Gorgosaurus libratus*,  
469 *Tarbosaurus bataar*, and *T. rex* as well as Delaware tyrannosauroid metatarsal, exhibit a deeply  
470 notched articular surface for the third metatarsal on the corresponding surface of the second

471 metatarsal [11,63,77]; whereas the articular surface for MT-III on MMNS VP-6332 is relatively  
472 flat and weakly notched as in ornithomimosaur [62,64,78] (Fig 4E).

473 The proximal and distal ends are slightly rotated clockwise in relation to the main axis,  
474 resulting in a weakly twisted metatarsal shaft (Fig 4). Although this feature is unusual in  
475 ornithomimosaur, the medially rotated distal articular end is also reported in metatarsals of the  
476 large Gansu ornithomimid, in which the articular surface is slightly inclined distally and medially  
477 [65]. Although the degree of rotation in MMNS VP-6332 is greater than that observed in the large  
478 Gansu ornithomimid, it is possible that this may relate to pathological deformation.

479 The posterior surface of the pathologically unaffected proximal shaft of MMNS VP-6332  
480 bears a flat surface (mediolaterally ~1 cm wide), which is bordered by prominent longitudinal  
481 ridges laterally and medially as in *O. velox* and the large Gansu ornithomimid (Fig 4B) [61,65].  
482 The lateral ridge is more extensive proximodistally than the medial ridge, extending to the  
483 pathologically affected bone and then obscured due to pathology. The flat surface has a square-  
484 shaped outline in cross-sectionally, distinguishing it from caenagnathoids, such as *C. collinsi* and  
485 other referred specimens (e.g., TMP 1993.036.0197 and TMP 1993.036.0198), which exhibit a  
486 convex surface [69,79]. Furthermore, the prominent longitudinal groove exists along the  
487 anterolateral surface of MMNS VP-6332 in lateral view (Fig 4C). Although this groove is  
488 relocated from the original position due to pathological deformation, it is apparent that it  
489 represents the anterior border of the articular surface for the MT-III.

490 The articulation for the metatarsal-phalangeal joint of the distal articular surface is non-  
491 ginglymoid; rather, it has a smooth and bulbous articular surface as in other ornithomimosaur  
492 (Fig 4A and F). Transversely, the distal articular caput is slightly broader than the width of the  
493 shaft in anterior view like *O. velox* and the large Gansu ornithomimid (Fig 4F). The height/width  
494 ratio of the distal articular caput is subequal, with equally developed two distal condyles, forming

495 a round bulbous shape in posterior view. The condyles have straight lateral and slightly concave  
496 medial outlines and are separated by a relatively deep, broad intercondylar sulcus in distal view.  
497 The lateral condyle is slightly larger than the medial condyle, particularly on the posterior surface.  
498 The bulbous medial condyle of MMNS VP-6332 is unlike that of the narrow and more sharply  
499 ridged medial condyles of late-diverging ornithomimosaur, such as *O. velox*, *A. tugrikinesis*,  
500 and the large Gansu ornithomimid, as well as early-diverging ornithomimosaur (e.g., *H.*  
501 *okladnikovi*, [66]). It exhibits shallower intercondylar sulcus than observed on *O. velox*.  
502 Furthermore, it bears well-developed collateral ligament fossae (Fig 4C-D). The shape of these  
503 collateral ligament fossae is equally ellipsoid, but the lateral collateral ligament fossa is  
504 proportionately larger and deeper than the medial one. They are positioned at approximately the  
505 center of the distal caput. The shape of the collateral ligament fossae is different from that of *O.*  
506 *velox*, which bears round ligament fossae in outline [61].

507 Broadly speaking, theropods bearing arctometatarsalian feet include deinonychosaurs,  
508 caenagnathoid oviraptorosaurs, ornithomimosaur, and tyrannosauroids. However, the presence of  
509 the non-ginglymoid distal articular surface of MMNS VP-6332 differentiates this element from  
510 that of deinonychosaurs (e.g., *Adasaurus mongoliensis*, *D. antirrhopus*, *Dromaeosaurus*  
511 *albertensis*, and *Velociraptor mongoliensis*) [81–84]. A square-shaped outline of the posterior  
512 border of the proximal articular surface, lack of the posteromedial ridge along the shaft, and the  
513 convex, non-ginglymoid distal articular surface with a posteriorly blunt lateral and medially more  
514 deflected medial condyles rules out caenagnathoid oviraptorosaurs [69,79]. In general, the  
515 combination of a straight, slender shaft, expanded proximal end, and non-ginglymoid distal  
516 articular surface of MMNS VP-6332 broadly resembles those of the Appalachian  
517 tyrannosauroids, such as *A. montgomeriensis* and the Delaware tyrannosauroid (S3 Fig), as well  
518 as those of slender footed tyrannosauroids, including *Alectrosaurus olseni* and *Moros intrepidus*



519 [11,16,85,86]. However, several other morphological differences of tyrannosauroids allow us to  
520 exclude MMNS VP-6332 from the group. For example, an extreme medial expansion of the  
521 proximal end bearing a deeply notched proximal articular surface for the third metatarsal, a  
522 dorsally bending and ventrally convex shaft in lateral view, the absence of distinct ridges on the  
523 posterior surface, and the slightly curved prominent ridge along the anterolateral corner of the  
524 distal end are features characteristic of the small to medium-bodied tyrannosauroids, such as *A.*  
525 *olseni*, *A. montgomeriense*, and *M. intrepidus* [11,86] and the Delaware tyrannosauroid [16], that  
526 are not observed on MMNS VP-6332. Furthermore, the elongate, slender MMNS VP-6332  
527 metatarsal differs from those of the robust metatarsals of the large-bodied tyrannosaurids, such as  
528 *Albertosaurus sarcophagus* (e.g., AMNH 5432), *T. rex* (e.g., AMNH 973 and FMNH PR 2081),  
529 and *G. libratus* (CMN 2120) (S3 Fig). In addition, MMNS VP-6332 can also be differentiated  
530 from tyrannosaurs by possessing a straight metatarsal with a suboval cross-section of the shaft  
531 and lacking a buttressing flange at the posterolateral border, where the second metatarsal contacts  
532 with the fourth metatarsal distally [63,87,88].

533

### 534 **The third metatarsal (MT-III)**

535 The distal half of a right third metatarsal (MSC 13139) is only preserved (Fig 5; Table 1),  
536 but the preserved portion is damaged at the mid part of the shaft (Fig 5A). The shaft is  
537 mediolaterally broad anteriorly with a flat surface that transitions proximally to become extremely  
538 thin and narrow, forming a splint bone with a slightly convex anterior surface. The cross-section  
539 of MSC 13139 is wedge-shaped and transversely wider than deep.

540

541 **Fig 5. Distal half of the right third metatarsal (MSC 13139).** (A), anterior; (B), posterior; (C),  
542 medial; (D), lateral; (E), distal views. Interpretive illustration of *A. tugrikinesis* (MPC-D

543 100/130) shows the approximate location of the preserved portion of the metatarsal.

544 Abbreviations: asMTIII, articular surface for the third metatarsal; asMTIV, articular surface for

545 the fourth metatarsal; clf, collateral ligament fossa; elp, extensor ligament pit; fps, flat posterior

546 surface; ics, intercondylar sulcus; lc, lateral condyle, lt, “lateral tab”; mc, medial condyle.

547

548

549 **Table 1. Measurements of the preserved elements of the Eutaw ornithomimosaur.**

550 Abbreviations: (DH), distal height; (DW), distal width; (MC), midshaft circumference (least

551 point); (MH) midshaft height (MW), midshaft width (least point); (PH), proximal height; (PW),

552 proximal width; (TL), total length. Note that a single asterisk (\*) indicate measurements are taken

553 from the incomplete elements.

| Specimen #                                 | The description of the elements                                | TL     | PW     | PH     | MW    | MH     | MC  | DW    | DH    |
|--------------------------------------------|----------------------------------------------------------------|--------|--------|--------|-------|--------|-----|-------|-------|
| Large-bodied ornithomimosaur specimens     |                                                                |        |        |        |       |        |     |       |       |
| MMNS VP-4949                               | a pedal phalanx III-1                                          | 153.85 | 69.02  | 61.41  | 42.81 | 31.64  | -   | 63.12 | 42.32 |
| MMNS VP-4955                               | a pedal phalanx II-1                                           | 150    | 40.74  | 49.93  | 27.47 | 29.93  | -   | 35.98 | 35.02 |
| MMNS VP-6183                               | a distal half of the metatarsal IV                             | 212*   | -      | -      | 26.92 | 35.27  | 101 | 32.71 | 60.54 |
| MMNS VP-6332                               | a metatarsal II with a pathology                               | 434est | 41.81* | 63.30* | 46.94 | 52.64  | -   | 42.1  | 42.31 |
| MMNS VP-7119                               | a pedal phalanx IV-2                                           | 91.84  | 52.21  | 51.58  | 42.64 | 34.52  |     | 48.59 | 42.57 |
| MMNS VP-8826                               | the astragalus with the fibula and the calcaneum contacts      | 93.04* | -      | -      | -     | -      | -   | -     | -     |
| MMNS VP-9444                               | a proximal end of the pedal phalanx II-1                       | -      | 38.28  | 46.35  | -     | -      | -   | -     | -     |
| MSC 13139                                  | a distal half of the metatarsal III                            | 220*   | -      | -      | 20.17 | 10.17* | -   | 50.84 | 44.8  |
| Medium-bodied specimens (in Supplementary) |                                                                |        |        |        |       |        |     |       |       |
| MMNS VP-2963                               | a manual ungual                                                | 69.82  | 13.48  | 21.23  | -     | -      | -   | -     | -     |
| MMNS VP-113                                | a partial centrum of the posterior half of the dorsal vertebra | 73.37* | -      | -      | 23.26 | -      | -   | 60.34 | 70.63 |
| MMNS VP-6120                               | anterior dorsal centrum                                        | 55.49  | 30.77  | 39.14  | 15.48 | -      | -   | 26.41 | 32.57 |

|              |                                                 |        |       |       |   |   |     |       |       |
|--------------|-------------------------------------------------|--------|-------|-------|---|---|-----|-------|-------|
| MMNS VP-6329 | a centrum of the posterior half caudal vertebra | 100.48 | 40.02 | 49.23 | - | - | -   | 41.18 | 36.85 |
| MMNS VP-6419 | a manual phalanx III-1                          | 48.67  | 26.14 | 28.22 | - | - | -   |       | 20.74 |
| MMNS VP-7649 | a tibial shaft                                  | 270*   | -     | -     |   |   | 129 | -     | -     |

554

555 In anterior view, the medial border of the proximal-most preserved portion of the shaft is  
556 straighter when compared to the lateral one, which trends proximomedially, constricting the shaft  
557 at midlength for reception of the fourth metatarsal (Fig 5A). The latter feature is common in both  
558 arctometatarsalian and non-arctometatarsalian ornithomimosaur (e.g., *R. evadens* and  
559 *Ornithomimus edmontonicus* [CMN 8632, ROM 797, ROM 851, and TMP 1995.110.1]). In MSC  
560 13139, the lateral and medial articular surfaces for the adjacent metatarsals are flat and face  
561 posterolaterally and posteromedially, which is clearly indicating an arctometatarsalian foot  
562 condition as in late-diverging ornithomimosaur (Fig 5B). Distinct, subequal circular impressions  
563 are located on each side of the posterolaterally and posteromedially facing surfaces proximal to  
564 the distal caput (Fig 5B). These depressions are presumably the attachment scars for the other  
565 metatarsals (Fig 5B). The lateral scar is positioned more distally than the medial scar, and so it is  
566 presumed that the fourth metatarsal is slightly longer than the second metatarsal, consistent with  
567 the condition observed in late-diverging ornithomimosaur [25]. In anterior view, the lateral  
568 margin of MSC 13139 is more laterally extensive than the medial margins, which would have  
569 only slightly overhung the second metatarsal. Both lateral and medial anterior margins proximal  
570 to the distal articular caput are smooth and round, and the medial margin is slightly pinched  
571 compared to the lateral margin of *O. velox* in anterior view. In overall appearance, the  
572 morphology of the MSC 13139 shaft is similar to those of the type specimen of *O. velox* (YPM  
573 548) and the large Gansu ornithomimid [61,65] (S4A and S4E Fig); however, it differs from the

574 strongly concave and sinuous medial margin of the third metatarsal of *S. altus* (e.g., AMNH 5339,  
575 AMNH 5383).

576 Anteriorly, the outline of the lateral and medial margins of the distal end of MSC 13139  
577 are straight and the entire distal caput is rectangular-shaped as in late-diverging ornithomimosaur  
578 like *A. tugrikinensis*, *D. brevitertius*, *O. velox*, and *R. evadens* (S4A-D Fig), but unlike the  
579 condition in *A. fridayi*, *B. grandis*, *Q. henanensis* and the large Gansu ornithomimid, which have  
580 a more mediolaterally widened articular caputs relative to the transverse width of distal shaft  
581 (S4E-H Fig). Furthermore, MSC 13139 exhibits a small lateral process on the anterolateral  
582 surface of the distal end just proximal to the caput (Fig 5A) (“lateral tab,” sensu Zanno et al.  
583 2011). A lateral tab is also documented on *O. velox*, *R. evadens* [74], and *A. tugrikinensis*, but it is  
584 much weaker in these taxa than the well-developed lateral tab of troodontid metatarsals (e.g., *T.*  
585 *sampsoni*, *Troodon formosus*, and *S. inequalis* [43,75,76]) (S4D-E Fig). A shallow, semicircular-  
586 shaped extensor ligament pit is present immediately proximal to the distal articular caput as in  
587 ornithomimosaur (Fig 5A), which is differentiated from those of oviraptorosaurs, such as *Anzu*,  
588 *G. erlianensis* and *Heyuannia huangi* [66,67]. The degree of development is similar to late-  
589 diverging ornithomimosaur, such as *O. velox* and *S. altus*, and unlike those of early-diverging  
590 ornithomimosaur, such as *A. fridayi*, *B. grandis* and *D. mirificus*, which bears proximodistally  
591 extended deep and narrow extensor ligament pit.

592 The distal articular surface of MSC 13139 is smooth and non-ginglymoid with unevenly  
593 developed lateral and medial condyles (Fig 5A). The lateral and the medial distal condyles are  
594 mediolaterally subequal, but the medial condyle is posteriorly more extended and  
595 anteroposteriorly slightly taller than the lateral condyle in distal view (Fig 5E). Although this  
596 feature is present in most ornithomimosaur, *S. altus* (CMN 930) and *O. edmontonicus* (CMN  
597 8632) exhibit relatively equal distal condyles [91]. Moreover, the distal articular surface is

598 mediolaterally wider than it is anteroposteriorly and bears a shallow vertical groove along the  
599 midlength (Fig 5E). The mediolaterally wider distal articular surface with anteroposteriorly more  
600 pronounced medial condyle of MSC 13139 is similar to the tyrannosauroid *A. montgomeriensis*  
601 and the caenagnathid *Elmisaurus rarus*, but it differs from the troodontid *T. sampsoni* and *S.*  
602 *inequalis* (Fig. S4). In anterior view, the median groove on the distal articular surface of MSC  
603 13139 is more pronounced than other ornithomimosaur, such as *R. evadens* and the large Gansu  
604 ornithomimid in anterior view [61,74] (S4C and S4E Fig).

605         In posterior view, the posterior surface of the shaft has a relatively broad flat surface (less  
606 than 1 cm wide) proximally and a posteriorly pointed surface distally (Fig 5B). The feature is  
607 similar to some ornithomimosaur, such as *O. velox*, *G. bullatus* and the large Gansu  
608 ornithomimid [61,64,65], but it is inconsistent with *A. tugrikinensis*, which displays a sharp ridge  
609 posteriorly along the proximal shaft [62]. Distally, MSC 13139 bears the sub-equally developed  
610 lateral and medial condyles on the posterior surface of the distal caput (Fig 5B). The lateral  
611 condyle has a smooth surface, whereas a prominent longitudinal ridge is developed just proximal  
612 to the medial condyle, which extends ~1 centimeter proximally (Fig 5B). Posteriorly, lateral and  
613 medial condyles are well-separated by a deep intercondylar sulcus like some ornithomimosaur  
614 (e.g., *O. edmontonicus* [CMN 8632], *G. bullatus* and *Tototlmimus packardensis* [50,78]) (Fig 5E).  
615 The intercondylar sulcus is variably developed within ornithomimosaur taxa by the degree of  
616 depth [74]. For example, some ornithomimosaur taxa, such as *R. evadens* [74], display a straight  
617 outline with no intercondylar sulcus. The depth of the intercondylar sulcus on MSC 13139 is  
618 similar to *G. bullatus*, *Garudimimus brevipes*, the large Gansu ornithomimid, and some  
619 undescribed Asian ornithomimid specimens (pers. obs.). The depth of these sulci differs from the  
620 condition in some ornithomimosaur taxa, such as *A. fridayi*, *H. okladnikovi*, *O. edmontonicus*  
621 (CMN 8632), *O. velox* and *S. altus* (CMN 930), which bear shallow intercondylar sulci

622 [14,61,74,80]. The lateral and medial collateral ligament fossae are equally well-developed both  
623 in size and depth in MSC 13139, similar to other theropods (Fig 5C and D). The outline of these  
624 pits is subcircular, and they are positioned at the center of each side of the distal caput. Overall,  
625 the distal end of MSC 13139 is typical of ornithomimosaurids (e.g., *A. tugrikinesis*, *G. bullatus*, *G.*  
626 *brevipes*, *O. edmontonicus*, *O. velox*, and *S. altus* [25,47,48]) (Fig 5A and E) albeit  
627 distinguishable from those of troodontids, another arctometatarsalian theropod clade, in which the  
628 distal articular surface is taller than wide in distal view (S5D-E Fig) [93].

629         MSC 13139 cannot be referred to large theropods, such as allosauroids and  
630 tyrannosaurids, nor to other medium-sized theropods, such as dromaeosaurids, troodontids, and  
631 caenagnathids, based on a number of characteristics. A proximally slender shaft with a wedge-  
632 shaped, triangular cross-section of the “arctometatarsalian condition,” shallow extensor ligament  
633 pit, and mediolaterally distally unexpanded distal articular caput in MSC 13139 clearly  
634 distinguish it from allosauroids (e.g., *Acrocanthosaurus atokensis* [NCSM 14345], and *A.*  
635 *fragilis*), which have a mediolaterally unconstricted transversely wide shaft and expanded distal  
636 articular caput with a deep extensor ligament pit [94,95]. These features are also present in  
637 tyrannosaurids (e.g., *A. sarcophagus*, *Daspletosaurus torosus*, and *T. rex* [82]). However, several  
638 other morphological features of tyrannosaurids, such as a strongly deviated (medially bulging)  
639 medial anterior margin, anteroposteriorly taller than mediolaterally wider shaft at midshaft, deep  
640 external ligament pit, and subrectangular distal articular surface without an intercondylar sulcus,  
641 differentiate the MSC 13139 metatarsal from tyrannosaurids. Most of these characteristics are  
642 present even in early ontogenetic stages in tyrannosaurids, based on our observations of a juvenile  
643 specimen of *T. bataar* (MPC-D 107/7), thus they are reliable diagnostic features. Similar to the  
644 slender metatarsals of more early-diverging, non-tyrannosaurid tyrannosauroids, such as *A. olseni*,  
645 *A. montgomeriensis*, and *G. libratus*, are the anteriorly unexpanded, straight distal articular caput

646 in lateral view, a wedge-shaped cross-section of the shaft with flat articular surfaces for the  
647 adjacent metatarsals, a larger medial condyle, and centrally positioned, equally developed  
648 collateral ligament fossae [11,85,97]. However, the presence of a deep extensor ligament pit, a  
649 distinct demarcating lip on the posterior articular surface of the distal condyle, and a single,  
650 ungrooved distal articular surface with a lack of the intercondylar sulcus of these same taxa  
651 exclude MSC 13139 from tyrannosauroids.

652 MSC 13139 also cannot be referred to dromaeosaurids, oviraptorosaurs, and troodontids.  
653 MSC 13139 is differentiated from dromaeosaurids and some oviraptorosaurs by an  
654 arctometatarsalian condition with a non-ginglymoid articular surface [81,82,84,98]. On the other  
655 hand, resemblance to troodontids is seen in an arctometatarsalian third metatarsal with  
656 asymmetrical distal condyles (exhibiting a larger medial condyle), straight lateral and convex  
657 medial borders in distal view, a shallow sulcus on the articular surface, a shallow semi-circular  
658 extensor ligament fossa, and a transversely slight narrowing shaft directly proximal to the distal  
659 caput on the anterior surface of MSC 13139 (e.g., *G. mongoliensis*, *Stenonychosaurus inequalis*,  
660 *T. sampsoni* and *Zanabazar junior*) [57,58,89,99]. However, MSC 13139 can be differentiated  
661 from troodontids by a distal end that is mediolaterally wider than anteroposteriorly tall in distal  
662 view, a less pronounced lateral tab on the anterolateral margin of the distal caput, and a weakly  
663 developed intercondylar sulcus on the posterior surface. A subequally proportioned distal articular  
664 surface in distal view with an anteroposteriorly more extended medial condyle, and a posteriorly  
665 demarcated distinct lip, are troodontids features (e.g., *S. inequalis* and *T. sampsoni*) that can be  
666 used to rule out the affinity of that group with MSC 13139 [57,90] (S5D-E Fig).

667

## 668 **The fourth metatarsal (MTIV)**

669           The distal half of a left fourth metatarsal (MMNS VP-6183) bears a well-preserved distal  
670 articular surface, mediolaterally compressed distal caput, laterally flared distal condyle, and  
671 articular surface for the third metatarsal along the medial surface of the shaft (Fig 6). The shaft is  
672 straight and slender relative to its width, which differs from the robust tyrannosaurids' metatarsals  
673 (e.g., *A. sarcophagus*, *G. libratus*, and *T. rex*) [63,87,97], but not from slender-footed  
674 tyrannosauroid taxa (e.g., *A. olseni*, and *M. intrepidus*) [85,86]. The preserved distal shaft is  
675 anteroposteriorly taller than the mediolateral width (Fig 6, Table 1). As in most late-diverging  
676 ornithomimosaur, the shaft exhibits flat anteromedial (articular surface for the third metatarsal)  
677 and posteromedial surfaces, separated by a sharp ridge, and a slightly convex lateral surface,  
678 displaying a subtriangular shape in proximal cross-sectional view (Fig 6E). This contrasts with  
679 the condition of early-diverging ornithomimosaur, such as *A. fridayi* and *G. brevipes*, which  
680 display a subrectangular shaft in cross-section [14,100]. In lateral view, the shaft slightly narrows  
681 just proximal to the distal articular caput, creating a slight anterior arch (Fig 6C). A similar  
682 arching is observed in tyrannosauroids such as *A. sarcophagus* (ROM 807), *A. montgomeriensis*,  
683 and *M. intrepidus* [11,86]; however, it is much more pronounced in those taxa than in MMNS  
684 VP-6183. The posterior surface of the corresponding region of MMNS VP-6183 is rugose and  
685 bears two distinct ridges--posteromedial and posterolateral (Fig 6C-D). The posteromedial ridge  
686 originates proximal to the lateral condyle and extends to the posteromedial edge, confluent with  
687 the posteromedial margin of the shaft (Fig 6B). The posterolateral ridge is slightly stronger and  
688 broader than the posteromedial and gradually fades just proximal to the distal articular caput. This  
689 ridge is much weaker than the condition observed in slender-footed tyrannosauroids (e.g., *M.*  
690 *intrepidus* [72]).  
691



692 **Fig 6. Distal half of the left fourth metatarsal (MMNS VP-6183).** (A), anterior; (B), posterior;  
693 (C), lateral; (D), medial; (E), proximal; (F), distal views. Abbreviations: a, anterior; asMTIII,  
694 articular surface for the third metatarsal; clf, collateral ligament fossa; g, groove; ics,  
695 intercondylar sulcus; l, lateral; lc, lateral condyle; m, medial; mc, medial condyle; p, posterior;  
696 plr, posterolateral ridge; pmr, posteromedial ridge.

697

698

699 The distal articular caput of MMNS VP-6183 is slightly rotated counter-clockwise in  
700 distal view (Fig 6F). The distal articular surface is taller than wide due to the extreme  
701 anteroposterior expansion of the distal caput, visible in medial or lateral views (Fig 6C-D).  
702 Although anterior expansion is more commonly seen in ornithomimosaur than in  
703 tyrannosauroids, the degree of the development is variable among early-diverging species of  
704 ornithomimosaur, such as *A. fridayi* and *G. brevipes*, bearing an anteriorly expanded distal caput  
705 [14,100], as well as late-diverging taxa bearing an anterior margin more in line with the anterior  
706 shaft in lateral view (e.g., *O. velox*, *S. altus* (AMNH 5339) and *R. evadens* [47,60,87]). The  
707 smooth, non-ginglymoid, anteroposteriorly taller than wide distal articular surface of MMNS VP-  
708 6183 resembles that of the tyrannosauroid *M. intrepidus*; however, the distal caput is not  
709 anteriorly expanded in *M. intrepidus*, nor in other tyrannosaurs (e.g., *A. sarcophagus* and *A.*  
710 *montgomeriensis*), which are characterized by a straight anterior margin over the distal caput in  
711 lateral view [11,86]. Although the tyrannosauroid *D. aquilunguis* exhibits a similar condition to  
712 MMNS VP-6183, the slenderness of MMNS VP-6183, with its anteroposteriorly taller than wide  
713 shaft, is distinct from *D. aquilunguis* [102].

714 The medial collateral ligament fossa of MMNS VP-6183 is circular and larger than the  
715 proximodistally elongated lateral fossa (Fig 6C-D). Whereas the medial collateral fossa is

716 centered on the distal caput, the lateral collateral ligament fossa is located close to the posterior  
717 margin of the lateral condyle. MMNS VP-6183 bears a prominent groove on the anterolateral  
718 surface of the distal caput (Fig 6C). Although this groove is similar to that reported on the  
719 corresponding surface of the fourth metatarsal of the tyrannosauroid *M. intrepidus* ([72], fig. 3g-  
720 h), it is much shallower and does not extend to the collateral ligament fossa, which is  
721 distinguishable from the condition in *M. intrepidus*. Posteriorly, the distal caput has two unevenly  
722 developed distal condyles; the lateral condyle is larger than the medial condyle, as in *M.*  
723 *intrepidus*, yet unlike the condition of other tyrannosauroids (e.g., *A. montgomeriensis*, *G.*  
724 *libratus*, and *T. rex* [11,49]) (Fig 6B and F). The lateral and the medial condyles are separated by  
725 a weakly developed intercondylar sulcus in distal view, similar to that observed on the Delaware  
726 tyrannosauroid metatarsal [16], but in contrast to the condition in *A. montgomeriensis* ([11], fig.  
727 19g). The proximodistally straight shaft and absence of a posteriorly backswept distal caput  
728 allows us to rule out a tyrannosauroid affinity for MMNS VP-6183 (e.g., [58,72]).

729

### 730 **Pedal phalanges**

731 Four pedal phalanges are preserved in the Eutaw ornithomimosaur assemblage, but appear  
732 to belong to different individuals (Fig 7). Two of them are associated with left and right sides of  
733 the first phalanx (MMNS VP-9444 and MMNS VP-4955), one is a first phalanx of third digit  
734 (MMNS VP-4949), and one is a second phalanx of fourth digit (MMNS VP-7119).

735

736 **Fig 7. Pedal phalanges of Eutaw ornithomimosaur.** (A<sub>1</sub>-A<sub>6</sub>) the first phalanx of the second  
737 digit of left foot, (MMNS VP-4955); (B<sub>1</sub>-B<sub>6</sub>) the first phalanx of the second digit of right foot,  
738 (MMNS VP-9444); (C<sub>1</sub>-C<sub>6</sub>) the first phalanx of the third digit of right foot, (MMNS VP-4949);  
739 (D<sub>1</sub>-D<sub>6</sub>) the second phalanx of the fourth digit of left foot, (MMNS VP-7119). (A<sub>1</sub>-D<sub>1</sub>) anterior,

740 (A<sub>2</sub>-D<sub>2</sub>) posterior, (A<sub>3</sub>-D<sub>3</sub>) lateral, (A<sub>4</sub>-D<sub>4</sub>) medial, (A<sub>5</sub>-D<sub>5</sub>) proximal, and (A<sub>6</sub>-D<sub>6</sub>) distal views.

741 Abbreviations: c, curved ridge; clf, collateral ligament fossa; con, concavity; dep, depression on  
742 the lateral and medial surfaces of the proximal end; elp, extensor ligament pit; lr, lateral ridge; mr,  
743 medial ridge; pdp, posterodorsal process; r, ridge; t, tubercle; vr, vertical ridge.

744

745

## 746 **Pedal phalanx (PII-1)**

747 Two phalanges, one partial (MMNS VP-9444) and one complete (MMNS VP-4955), are  
748 referable to the first phalanx (PII-1) of the second pedal digit (Fig 7A and B). This referral is  
749 based on the length/width ratio of the phalanx, greater height than width, singular concave  
750 articular surface, and a well-developed intercondylar groove on the posterior surface of the  
751 proximal end. MMNS VP-9444 (a right phalanx) and MMNS VP-4955 (a left phalanx) are  
752 subequal in size and derived from individuals of similar size or possibly from a single individual.  
753 The following description uses both specimens in combination. In general proportions, MMNS  
754 VP-4955 is proximodistally three times longer than the height of its proximal articular surface, as  
755 in ornithomimosaurids (Table 1), and unlike PII-1 of tyrannosaurids and oviraptorosaurs, which are  
756 proximodistally shorter relative to the height of the proximal end. In dorsal view, the shaft of  
757 MMNS VP-4955 is asymmetrical with somewhat concave lateral and straight medial margins  
758 (Fig 7A1) closely resembling the condition observed in most ornithomimosaurids. This is in  
759 contrast to other large theropods, such as carcharodontosaurids, caenagnathids and tyrannosaurids  
760 [63,87,94,95,103], and decidedly distinct from the pedal PII-1 of dromaeosaurids (e.g., *D.*  
761 *albertensis* (AMNH 5356) [90]), and therizinosaurids (e.g., *F. utahensis* [45]), which possess a  
762 subequally and mediolaterally constricted shaft in anterior view (Fig 7A1 and A2).

763           The proximal end of MMNS VP-4955 is taller than wide, exhibiting a single concave  
764 articular surface in proximal view (Fig 7A5, Table 1). In proximal view, the margin of the  
765 proximal articular surface is anteromedially round, laterally straight, and slightly concave  
766 posteriorly, which is somewhat distinguishable from other theropods (Fig 7A5 and 7B5).  
767 Although the anteriorly round border of the proximal articular surface of MMNS VP-4955 is  
768 similar to tyrannosaurids (e.g., *T. rex* [FMNH PR 2081], *A. sarcophagus* [CMN 11315], and *G.*  
769 *libratus* [CMN 2120]) [63,87,96], the straight lateral and round medial borders of the proximal  
770 articular surface is different from the condition in tyrannosaurids, which display laterally round  
771 and medially angled borders in proximal view. The outline of the proximal articular surface of  
772 MMNS VP-4955 is somewhat similar to that of the large theropod *Allosaurus fragilis* [94];  
773 however, it is easily differentiated by the proportions of its relative proximodistal length. Both  
774 lateral and medial articular borders of the proximal end are straight in lateral and medial views  
775 (Fig 7A1 and 7A3-A4), as in ornithomimosaurids. This is unlike dromaeosaurids, such as *D.*  
776 *antirrhopus* (YPM 5205), *D. albertensis* (AMNH 5356), and *V. mongoliensis*, which exhibit  
777 highly concave lateral and medial articular borders and a median vertical ridge that is visible in  
778 lateral and medial views. On the posterior surface, there are two distinct ridges along the lateral  
779 and medial borders of the proximal heel (Fig 7A5). These ridges are separated by a deep sulcus as  
780 in other theropods, such as ornithomimosaurids and tyrannosaurids [14,25,62,74,75,96], but unlike  
781 those of oviraptorosaurs and therizinosaurids, which typically exhibit a relatively flat surface at  
782 this region. The medial ridge is mediolaterally wide and stouter than the lateral ridge (Fig 7A5  
783 and 7B5). Likewise, in the holotype specimen of *O. velox* [61], both lateral and medial ridges on  
784 the heel are curved in lateral and medial views (Fig 7A3-A4), unlike the condition in Asian taxa,  
785 such as *Aepyornithomimus tugrikinensis* and *G. brevipes*. *A. tugrikinensis* differs by exhibiting a  
786 straight lateral ridge (fig. 4c and 4d, [48]); *G. brevipes* is distinguished by a lateral ridge on the

787 heel that is squared in lateral view (fig. 17c, [86]). There is a weak, proximodistally extended  
788 tubercle present on each lateral and medial surfaces of the proximal end of MMNS VP-4955 (Fig  
789 7A4). A similar tubercle is also present on the corresponding surfaces of MMNS VP-9444,  
790 suggesting that this tubercle is not a pathology, and the morphologically similar tubercle is also  
791 found on the holotype specimen of *O. velox*. This contrasts with *A. tugrikinensis*, which exhibits a  
792 more laterally tilted posterolateral border of the proximal end in anterior view.

793 Furthermore, unlike the relatively straight anterior surface of tyrannosaurids, the anterior  
794 surface of MMNS VP-4955 gently slopes from the proximal end to the distal end in lateral view  
795 (Fig 7A3) until it reaches the distal caput as in ornithomimosaurids. Overall, the outline of the  
796 proximal articular surface of MMNS VP-4955 is consistent with most ornithomimosaurids, such as  
797 *A. tugrikinensis*, *G. brevipes*, *O. velox*, and the Bissekty taxon [61,62,100,105]. However, it is  
798 different from PII-1 of the early-diverging ornithomimosaur *A. fridayi*, which exhibits a  
799 mediolaterally wide and nearly round proximal articular surface in proximal view [14]. The cross-  
800 section of the shaft is round as in other ornithomimosaurids (Fig 7B6).

801 On the anterior surface, just proximal to the distal condyles, MMNS VP-4955 bears a  
802 shallow, weakly developed external ligament pit (Fig 7A1), which also resembles those of late-  
803 diverging ornithomimosaurids, such as *A. tugrikinensis*, *G. bullatus*, *O. edmontonicus* (ROM 851),  
804 *O. velox*, *Sinornithomimus dongi*, and *S. altus* (CMN 930 and TMP 90.26.01)  
805 [24,25,61,62,64,106], but is unlike those of early-diverging ornithomimosaurids *A. fridayi* and  
806 *Nqwebasaurus thwazi* that exhibit a relatively deep external ligament pit on the corresponding  
807 surface of the phalanges [14,107]. Posteriorly, the MMNS VP-4955 shaft is relatively flat, the  
808 only concavity present is slight and lies between the lateral and medial ridges proximally and  
809 between the condyles distally, as in other ornithomimosaurids (Fig 7A2 and 7A5-A6). This is  
810 unlike the condition in oviraptorosaurs (e.g., *G. erlianensis* and *Oksoko avarsan* [53,94]).

811           The distal end of MMNS VP-4955 exhibits subequally developed lateral and medial  
812 condyles, divided by a shallow midline groove distally (Fig 7A1). The lateral condyle is slightly  
813 constricted mediolaterally and is anteroposteriorly longer than the medial condyle in distal view  
814 (Fig 7A6). The anteroposterior height and mediolateral width of the distal articular surface are  
815 subequal, which is differentiated from transversely wider than tall distal articular surfaces of  
816 tyrannosaurid taxa, such as *T. rex* (FMNH PR 2081) and *G. libratus* (FMNH PR 2211). In this  
817 respect, MMNS VP-4955 closely resembles those of ornithomimosaurids (Fig 7A6, Table 1). In  
818 addition, the borders of the lateral and medial distal condyles are closely positioned anteriorly,  
819 exhibiting a mediolaterally constricted articular surface in distal view. The feature is different  
820 from allosaurids, caenagnathids (e.g., *G. erlianensis*), and tyrannosaurids, as well as some  
821 medium-sized theropods, such as dromaeosaurids (e.g., *D. antirrhopus* and *D. albertensis*) and  
822 oviraptorosaurs (e.g., *O. avarsan*), which exhibit more widely placed distal condyles with a  
823 highly ginglymoid articulation [81,104,108]. Moreover, the lateral and medial condyles of  
824 MMNS VP-4955 are relatively flat and are not expanded anteriorly as they are in dromaeosaurids  
825 like *Achillobator giganticus*, *A. mongoliensis*, and *D. antirrhopus*, and troodontids like *S.*  
826 *inequalis* (CMN 1650) and *T. sampsoni* in lateral view [57,82,98,104]. The collateral ligament  
827 fossae of MMNS VP-4955 are well developed; the lateral collateral ligament fossa is larger and  
828 deeper than the medial one (Fig 7A3-A4). The condition is similar to ornithomimosaurids, but it is  
829 unlike tyrannosaurids (e.g., *A. sarcophagus* [CMN 11315], *G. libratus* [FMNH PR 2211], *T. rex*  
830 [FMNH PR 2081 and BMRP 2002.4.1]), which exhibit subequal-sized collateral ligament fossae.  
831 Although the morphology of the distal articular surface of MMNS VP-4955 is more consistent  
832 with ornithomimosaurids than other theropods, it also differs from specific ornithomimosaurids. For  
833 example, whereas MMNS VP-4955 bears equally pronounced distal condyles in anterior view, *A.*  
834 *tugrikinensis* has a more distally extended medial condyle (Chinzorig et al. 2017).

835

## 836 **Pedal phalanx (PIII-1)**

837           MMNS VP-4949 is referable to the first phalanx (PIII-1) of the third digit based on its  
838 relative symmetry, wider than tall proportions, single and slightly concave proximal articular  
839 surface, and weakly or non-grooved, non-ginglymoid distal articular surface with subequally  
840 developed condyles (Fig 7C). Both proximal and distal articular surfaces are slightly eroded;  
841 however, the phalanx is essentially complete except for a small portion of the anterolateral surface  
842 of the distal half (Fig 7C1). MMNS VP-4949 is proximodistally slender and elongate relative to  
843 the mediolateral width of the proximal end in anterior view (Fig 7C1). Comparatively, it is  
844 approximately two or three times longer than those of medium-sized ornithomimosaur (Table 2)  
845 and one to two times longer than those of large-bodied ornithomimosaur taxa (e.g., 171% the  
846 length of PIII-1 in *G. bullatus* [MPC-D 100/11] and 169% of *A. fridayi*) and approaches the size  
847 of *D. mirificus* (Table 2). A proximodistally slender PIII-1 is similar to those of the noosaurine  
848 *Vespersaurus paranaensis* [109], *D. antirrhopus* [81], and the tyrannosauroids *A. olseni* and  
849 *Gorgosaurus*. The length/width ratio of the proximal articular surface of MMNS VP-4949 is  
850 subequal, forming a subrectangular outline in proximal view, compared to the distal articular  
851 surface, which is much wider than its anteroposterior length (Fig 7C5). The proximal articular  
852 surface is anteriorly convex, posteriorly straight, and exhibits slightly notched lateral and medial  
853 borders in proximal view (Fig 7C5). MMNS VP-4949 also has a relatively straight articular  
854 border in anterior view (Fig 7C1), which differentiates it from the anteriorly round border of the  
855 proximal articular ends of tyrannosaurids, such as *T. rex* (e.g., FMNH PR 2081), *T. bataar* (e.g.,  
856 MPC-D 107/2), as well as allosaurids *A. fragilis* (YPM 1930). In this respect MMNS VP-4949 is  
857 somewhat similar to the PIII-1 of the large caenagnathids *A. wyliei* (CMN 78000) and *G.*  
858 *erlianensis*, as well as the therizinosauroid *F. utahensis* [59,67]. When viewed proximally, the



859 anterior aspect of the proximal surface of MMNS VP-4949 is slightly broadened mediolaterally,  
 860 compared to the posterior half (Fig. 7C5). This feature may be unique because it is not found on  
 861 ornithomimosaurids, tyrannosaurids (e.g., *T. rex* [FMNH PR 2081] and *G. libratus* [FMNH PR  
 862 2211]), allosaurids (e.g., *A. fragilis* [YPM 1930]), noosaurids (e.g., *V. paranaensis*), or  
 863 oviraptorosaurs. However, several features differentiate MMNS VP-4949 from many of these  
 864 theropods, including the presence of a nearly straight margin of the proximal articular end in  
 865 lateral view and a mediolaterally wide distal articular end. In addition, MMNS VP-4949 lacks an  
 866 extremely deep external ligament pit and ginglymoid distal articulation (Fig 7C1 and S6 Fig),  
 867 which is characteristic of many of the aforementioned incidents.

868

869 **Table 2. Length comparisons of different pedal phalanges between the Eutaw**

870 **ornithomimosaurids and other described ornithomimosaurids.** Note that a single asterisk (\*)

871 indicates the estimated value and dash (-) indicates unknown elements.

| Species names                         | Specimen #         | Pedal phalanx (II-1), in mm | Pedal phalanx (III-1), in mm | Pedal phalanx (IV-2), in mm |
|---------------------------------------|--------------------|-----------------------------|------------------------------|-----------------------------|
| <i>Aepyornithomimus tugrikinensis</i> | MPC-D 100/130      | 59.08                       | 52                           | 24                          |
| <i>Anserimimus planinychus</i>        | MPC-D 100/300      | 65                          | 56                           | 17                          |
| <i>Archaeornithomimus asiaticus</i>   | AMNH 6565          | 71                          | -                            | -                           |
| <i>Arkansaurus fridayi</i>            | 74-16-3-5          | 102                         | 91                           | 71                          |
| <i>Beishanlong grandis</i>            | FRDC-GJ (06) 01-18 | 120                         | -                            | -                           |
| <i>Deinocheirus mirificus</i>         | MPC-D 100/127      | 192                         | 165                          | 89.15                       |
| <i>Dromiceiomimus brevitertius</i>    | CMN 12068          | 67.4                        | 56                           | 21                          |
| <i>Dromiceiomimus brevitertius</i>    | CMN 12069          | 57.3                        | 27.8                         | 20.2                        |
| <i>Dromiceiomimus brevitertius</i>    | ROM 797            | 53                          | -                            | 33                          |
| <i>Dromiceiomimus brevitertius</i>    | ROM 852            | 80                          | -                            | 27                          |
| <i>Gallimimus bullatus</i>            | MPC-D 100/10       | 32                          | 31                           | 13                          |
| <i>Gallimimus bullatus</i>            | MPC-D 100/11       | 102                         | 90                           | 43                          |



|                                  |                     |        |        |       |
|----------------------------------|---------------------|--------|--------|-------|
| <i>Gallimimus bullatus</i>       | MPC-D 100/52        | 59     | 57     | 11    |
| <i>Gallimimus bullatus</i>       | ZPal MgD-I/8        | -      | 97     | 50    |
| <i>Gallimimus bullatus</i>       | ZPal MgD-I/94       | 45     | 44     | 19    |
| <i>Garudimimus</i>               | MPC-D 100/13        | 63     | 59     | 35    |
| <i>Harpymimus okladnikovi</i>    | MPC-D 100/29        | 72     | 67     | 34    |
| <i>Nqwebasaurus thwazi</i>       | AM 6040             | 20     | -      | -     |
| <i>Ornithomimus edmontonicus</i> | CMN 8632            | 78     | -      | 23.5  |
| <i>Ornithomimus edmontonicus</i> | ROM 851             | 78.8   | 72.3   | 35    |
| <i>Ornithomimus edmontonicus</i> | TMP 95.110.1        | 68.5   | -      | 22    |
| <i>Paraxenisaurus normali</i>    | BENC 2/2-001        | 115    | -      | -     |
| <i>Sinornithomimus dongi</i>     | IVPP V11797-10      | -      | 50.3   | 21.8  |
| <i>Struthiomimus altus</i>       | AMNH 5375           | 82     | 76     | 28    |
| <i>Struthiomimus altus</i>       | AMNH 5257           | 83     | 87     | 31    |
| <i>Struthiomimus altus</i>       | AMNH 5339           | 85     | -      | 26    |
| <i>Struthiomimus altus</i>       | CMN 930             | 75     | 67     | 21    |
| <i>Struthiomimus altus</i>       | TMP 90.26.1         | 94.2   | 80     | 26.9  |
| <i>Struthiomimus altus</i>       | UCMZ (VP) 1980.1    | 92     | 81     | 27    |
| <i>Rativitas evadens</i>         | ROM 1790            | 63.9   | 63.3   | 19.6  |
| <i>Gallimimus indet.</i>         | MPC-D 100/138       | 92     | 85.3   | 29    |
| <i>Ornithomimus sp.</i>          | MNA Pl.1762A        | 76     | -      | 26    |
| <i>Ornithomimidae indet.</i>     | MPC-D 100/121       | 65     | -      | 23    |
| Large Gansu ornithomimid         | IVPP V 12756        | 100.23 | -      | 84    |
| <b>Eutaw ornithomimosaur</b>     | <b>MMNS VP-4955</b> | 150    | 140*   | 110*  |
| <b>Eutaw ornithomimosaur</b>     | <b>MMNS VP-4949</b> | 164*   | 153.85 | 124*  |
| <b>Eutaw ornithomimosaur</b>     | <b>MMNS VP-7119</b> | 146*   | 136*   | 91.84 |

872

873

Anteriorly, the shaft of MMNS VP-4949 is straight (Fig 7C1), which is slightly

874

constricted mediolaterally and wider than tall, forming an oval shape in cross-section. The oval-

875

shaped cross-section of MMNS VP-4949 is like those of ornithomimosaur, but unlike large

876 theropods, such as *A. fragilis* (YPM 1930), *G. erlianensis*, and *T. rex* (FMNH PR 2081), which  
877 exhibit a taller than wide shaft with round or square cross-sections (S6I-L Fig).

878 In lateral view, the anterior surface of MMNS VP-4949 is straight, as in *T. rex* (e.g.,  
879 FMNH PR 2081) and *T. bataar* (e.g., MPC-D 107/2), but the morphologies of the lateral and  
880 medial borders of the proximal ends differ from these theropods in anterior view. For example,  
881 both lateral and medial sides of the proximal end are straight in MMNS VP-4949 and other  
882 ornithomimosaurids (Fig 7C1), whereas tyrannosaurids have mediolaterally broadened, more  
883 outwardly inclined lateral and medial borders relative to the midshaft (S6 Fig). The latter feature  
884 is also seen in some caenagnathids, such as *G. erlianensis* [67].

885 Each side of the posterolateral and posteromedial surfaces of the proximal end of MMNS  
886 VP-4949 bear depressions (Fig 7C3-C4). Similar depressions are seen in ornithomimosaurids, such  
887 as *A. tugrikinesis*, *G. brevipes*, *H. okladnikov* and *R. evadens* [62,74,80,100]. The lateral  
888 depression is more distinct and deeper than the medial one. The lateral depression is similarly  
889 deep in *G. brevipes*; however, in the latter taxon it forms a crescentic shape rather than a groove  
890 [100]. The presence of the distinct depressions seems to differentiate this taxon from *A. fridayi*,  
891 although the corresponding surfaces of *A. fridayi* are incomplete [14]. As in other  
892 ornithomimosaurids, the posterior surface of MMNS VP-4949 is relatively flat and straight in  
893 lateral view (Fig 7C2-C4). Although MMNS VP-4949 displays a rugose surface on the posterior  
894 aspect of the proximal end as in allosauroids, acrocanthosaurs and tyrannosauroids, it is much  
895 smoother than observed in these taxa (Fig 7C2).

896 Distally, MMNS VP-4949 bears a shallow extensor ligament pit on the anterior surface  
897 immediately proximal to the distal caput, which is wider distally than proximally, forming a  
898 triangular shape in anterior view (Fig 7C1). Although the feature of the proximally narrowed,  
899 shallow extensor ligament pit of MMNS VP-4949 is similar to caenagnathids, such as *Anzu* sp.

900 (CMN 78000) and *Chirostenotes elegans* (CMN 8538), a lack of the mediolaterally subequal  
901 distal end relative to the proximal end and a non-ginglymoid articular surface differentiates  
902 MMNS VP-4949 from these taxa. Although some tyrannosauroids (e.g., *A. sarcophagus* [CMN  
903 11315], *A. olseni* [MPC-D 100/51], and *G. libratus* [FMNH PR 2120]), also possess a  
904 proximodistally long and shallow extensor ligament pit. However, certain features allow us to rule  
905 out referral to this group, including the anteriorly expanded distal condyles relative to the  
906 proximal width and lack of a well-developed notch immediately proximal to the anterior surface  
907 of the distal caput, which are present on these same tyrannosauroids.

908         Distally, the lateral condyle is the smaller of the two and is slightly inclined dorsolaterally  
909 compared to the medial condyle. Moreover, the distal articular surface of MMNS VP-4949 is  
910 weakly concave and divided by a shallow vertical sagittal ridge in anterior view (Fig 7C1). The  
911 weakly concave distal articular surface is somewhat similar to that of tyrannosauroids and  
912 intermediately developed when compared to caenagnathoids. For example, the distal articular  
913 surface of the phalanx PIII-1 of *Citipes* is straight and lacks the sulcus in anterior view, whereas  
914 *Anzu* bears much greater concavity than MMNS VP-4949. However, in caenagnathoids, such as  
915 *C. elegans* (CMN 8538) and *Citipes* [79,110], the posterior margins of the lateral and medial  
916 distal condyles are not visible, whereas they are visible in MMNS VP-4949.

917         MMNS VP-4949 has comparatively large and equally deep collateral ligament fossae (Fig  
918 7C3-C4), which are different in morphology and position. The lateral collateral ligament fossa is  
919 subcircular, slightly larger than the medial fossa, and is positioned close to the anterior border of  
920 the condyle in lateral view. The medial collateral ligament fossa, on the other hand, is  
921 lachrymiform, proximodistally elongated, and is positioned centrally on the condyle, bearing a  
922 distinct groove proximally (Fig 7C3-C4). This differs from the condition in tyrannosaurids, which  
923 exhibit morphologically similar and subequally-sized collateral ligament fossae on both sides of

924 the distal caput [63,96], yet is similar to those of ornithomimosaurids, such as *G. brevipes*, *O.*  
925 *edmontonicus* (CMN 8632), and *S. altus* (CMN 930) [91].

926

## 927 **Pedal phalanx (PIV-2)**

928 MMNS VP-7119 is a complete and well-preserved phalanx (Fig 7D). Proximodistally  
929 longer than transversely wide, anteroposteriorly taller than wide, highly asymmetrical, and  
930 possessing strongly ginglymoid articular surfaces are features indicating that this specimen  
931 represents the second phalanx of left digit IV.

932 The articulation of the proximal end is divided into two subequal concave surfaces by a  
933 strong vertical ridge, visible in lateral view (Fig 7D3) as in *D. antirrhopus* (YPM 5205). This is in  
934 contrast to tyrannosaurids, such as *G. libratus* (FMNH PR 2211) and *T. rex* (FMNH PR 2081),  
935 which display a weakly developed ridge. As in ornithomimosaurids, the posterior process of the  
936 proximal articular surface is slightly more extended proximally than the anterior process in lateral  
937 view (Fig 7D4), which is in contrast to the tyrannosaurids condition of subequal development of  
938 processes. In anterior view, the anterior process is pointed proximally as in most  
939 ornithomimosaurids and dromaeosaurids, such as *D. antirrhopus* [111]; this differs from the  
940 rounded condition in tyrannosaurids. However, MMNS VP-7119 can be differentiated from *D.*  
941 *antirrhopus* by its asymmetrical and relatively straight shaft mediolaterally. The lateral border of  
942 the proximal articular end of MMNS VP-7119 is straight in proximal view, which closely  
943 resembles the condition in ornithomimosaurids but contrasts with Tyrannosauroidae (and possibly  
944 Allosauridae), which usually exhibit a sub-rectangular posteromedial border [63,87,96] (although  
945 the latter feature is less pronounced in *G. libratus* [FMNH PR 2211] than *A. sarcophagus* [CMN  
946 11345], and *T. rex* [FMNH PR 2081]). Nonetheless, MMNS VP-7119 can be distinguished from  
947 tyrannosaurs, namely *T. rex* (FMNH PR 2081) and *G. libratus* (FMNH PR 2211), in that the

948 proximal articular surface is slightly inclined laterally, exhibiting laterally and medially convex,  
949 and posteriorly concave borders in proximal view (Fig 7D5) [63,87].

950 The distal condyles are only slightly wider transversely in dorsal view compared to the  
951 shaft (Fig 7D3-D4). The condition is like that of dromaeosaurids, such as *D. antirrhopus*, but  
952 unlike those of tyrannosauroids, which have distal condyles that are greatly expanded  
953 mediolaterally relative to the shaft. The shaft of MMNS VP-7119 is robust and nearly straight  
954 mediolaterally and anteroposteriorly, as in ornithomimosaurids, and somewhat like *A. fragilis* (Fig.  
955 7D1 and D3). In this respect, it differs from those of dromaeosaurids and tyrannosaurids, which  
956 have a shaft that strongly constricts near the distal condyles in lateral view. However, *A. fragilis*  
957 can be differentiated from MMNS VP-7119 by the degree of difference between the mediolateral  
958 and anteroposterior width of the shaft, which is much greater in *A. fragilis* [94]. Laterally, MMNS  
959 VP-7119 exhibits a small, but prominent, obliquely oriented groove anteroposteriorly, on the  
960 posterolateral and posteromedial surfaces of the proximal end (Fig 7D3-D4).

961 Posteriorly, the proximal half of the posterior surface is slightly concave, with a rugose  
962 surface and weakly developed lateral and medial ridges. The shaft of MMNS VP-7119 is  
963 semicircular in cross-section due to a flat posterior surface.

964 The distal articular surface of MMNS VP-7119 is ginglymoid and bears unequally  
965 developed lateral and medial distal condyles, divided by a strong vertical ridge in distal view (Fig  
966 7D6). Anteriorly, these condyles are closely positioned to each other in anterior view and laterally  
967 inclined in distal view as in ornithomimosaurids (Figs 7D1 and 7D6) but unlike the borders of *A.*  
968 *fragilis*, *G. libratus*, and *T. rex*, as well as those of medium-sized theropods, such as *D.*  
969 *antirrhopus*. The mediolateral width of the condyles is approximately the same; however, the  
970 medial condyle is slightly larger and taller anteroposteriorly than the lateral condyle. In addition,  
971 whereas the axis of the lateral condyle is relatively perpendicular to the transverse width, the

972 medial distal condyle is obliquely oriented, with an anteromedial/posterolateral axis. This differs  
973 from the condition in tyrannosaurids such as *T. rex* (FMNH PR 2081), which has a straight medial  
974 condyle in distal view [63].

975

## 976 **Bone microstructure**

977 We examined osteohistological samples from two hind limb elements each belonging to a  
978 different ornithomimosaur size class occurring in the Eutaw assemblage. The bone matrix in both  
979 primarily preserve a woven-parallel complex with plexiform and reticular vascularization, and  
980 more isolated regions of longitudinal vascularization in the outer cortex. An external fundamental  
981 system (EFS) is absent in all sampled sections, with all periosteal regions showing active primary  
982 bone deposition, indicating that both individuals were still growing at the time of death (Figs 8B  
983 and 8G). MMNS VP-6332 exhibits a severe and chronic pathology affecting the cortex, the  
984 detailed description of which is beyond the scope of this paper.

985

### 986 **Fig 8. Paleohistological transverse sections of selected Eutaw ornithomimosaur elements.**

987 Cross-sections of the proximal-most (A-B), and midsection (C-E) of the second metatarsal shaft  
988 (MMNS VP-6332) of a large-bodied individual, and mid-section (F-I) of the tibial shaft (MMNS  
989 VP-7649) of medium-bodied individual. Details of the pattern of vascular orientation, LAG  
990 counts, cyclical growth marks, and remodeling shown (E-D), and (G-I). (B) the anterior-  
991 anteromedial region of image-A, showing primary tissue including lines of arrested growth  
992 (LAGs); (E-D) details of the pattern and the orientation of the vascularization of the anterior and  
993 the medial regions of the cortex of the midsection. Abbreviations: a, anterior; cgm, cyclical  
994 growth mark; elb, endosteal lamellar bone; epb, endosteal pathologic bone; m, medial; mc,  
995 medullary cavity; rc, resorptive cavity; so, secondary osteon. LAGs are indicated by green

996 arrowheads in images (B), (D-E), and (G-H). Dashed white line in image (G) indicates the  
997 transitional boundary of the zonation of vascularity. Gray-shaded areas in images (C) and (F)  
998 indicate the distribution of the secondary osteons in the cortex.

999

1000

## 1001 **The cross-section of the proximal shaft of MMNS VP-6332**

1002 MMNS VP-6332 was transversely sectioned just distal to the proximal-most end of the  
1003 shaft (Fig 8A). The thickness of the cortex ranges from 7.64-11.02 mm and is thickest anteriorly  
1004 (Fig 8A). A large medullary cavity is lined with well-preserved endosteal lamellar bone (ELB)  
1005 composed of multiple layers of avascular tissue (Fig 8B). Portions of the ELB are obliterated by  
1006 endosteal deposition of pathologic bone and resorption cavities (Fig 8A-B). Whereas the  
1007 anteromedial and medial regions of the outer cortex are composed of primary bone, the inner two-  
1008 thirds of the entire cortex is extensively remodeled circumferentially by multiple generations of  
1009 secondary osteons (Haversian bone). Between the ELB and this region of secondary remodeling,  
1010 numerous similarly-sized erosive cavities extend from the endosteal junction of the cortex  
1011 centrifugally to the middle cortex, forming a spongy medullary region, except for a few large  
1012 cavities, concentrated along the perimedullary region (Fig 8B). The overall density of secondary  
1013 osteons gradually decreases periosteally, so that the primary bone tissue is visible in the outer  
1014 region. Primary bone tissue consists of a woven-fibered matrix. In the outer cortex, the orientation  
1015 of the vascularization is predominantly longitudinal and reticular, with a minor component of sub-  
1016 plexiform vascularization (Fig 8B). At least six cyclical growth marks, including five lines of  
1017 arrested growths (LAGs) and one annulus, are present in the region of primary tissue between the  
1018 periosteal extent of secondary remodeling and the periosteal margin. The first two LAGs include  
1019 a couplet (Fig 8B). Together these comprised seven cyclical growth marks, although other LAGs

1020 were likely lost as a result of the extensive remodeling of the inner cortex due to the pathology  
1021 and medullary expansion (Fig 8A-B). The three LAGs closest to the periosteal surface are tightly  
1022 packed, superficially similar to the condition of an EFS. However, the matrix remains woven in  
1023 this region, the tissue is vascularized, and osteocyte lacunae are relatively plump, suggesting that  
1024 chronic pathology may more likely be the cause of the close spacing in these LAGs.

1025

## 1026 **The cross-section of the midshaft of MMNS VP-6332**

1027 An additional section of this element was made from the midshaft to capture the longest  
1028 growth record; however, the pathology is more extensive in this region (Fig 8C). The bone matrix  
1029 is a predominantly woven-parallel complex (Fig 8C-E). The thickness of the cortex is relatively  
1030 consistent in the lateral, medial, and posterior regions, and ranges between 4.59-5.64 mm, but the  
1031 anterior cortex is more than twice this thickness (12.06 mm). The medullary cavity is large  
1032 (maximum diameter 22.39 mm) relative to the cortex, which is infilled by highly disorganized  
1033 pathologic bone obliterating most of the primary bone near the endosteal surface (Fig 8C-D). The  
1034 vascular orientation in the cortex changes centripetally beginning with predominantly reticular  
1035 vascularization near the endosteal margin, transitioning to a combination of plexiform and  
1036 laminar vascularization in the middle cortex, and leading to primarily plexiform vascularization  
1037 towards the periosteal surface (visible medially). This is generally consistent with the vascular  
1038 patterns reported for other ornithomimid metatarsals [112,113] (Fig 8E). Secondary osteons are  
1039 rare throughout the cortex, except for three concentrated areas of remodeling with cross-cutting  
1040 secondary osteons in the lateral, posterolateral, and posteromedial regions (Fig 8C, gray shaded  
1041 areas). In addition, some narrow zones are infilled with secondary osteons, indicative of repaired  
1042 cracks in the cortex. Erosion cavities are extensive throughout the cortex and are relatively large  
1043 (0.08-1.6 mm), substantially larger than those of the proximalmost shaft of MMNS VP-6332.



1044 Remnants of the ELB (tightly packed avascular lamellar-fibered bone tissue) are present at the  
1045 posterolateral margin of the medullary cavity. At least nine LAGs are traceable throughout the  
1046 cortex of the midsection, representing ten growth cycles (Fig 8C-D). The pattern of LAG spacing  
1047 is relatively constant in the innermost four LAGs of the inner half of the cortex, with somewhat  
1048 more distant spacing in the mid-cortex, and a consistent decrease in spacing in the remaining  
1049 LAGs in the outer cortex towards the periosteal surface (Fig 8D), which is consistent with a  
1050 pattern often observed in sub-adult theropods [90]. No definitive EFS is visible in the periosteal  
1051 surface, consistent with the condition of the proximalmost shaft, confirming that an EFS is not  
1052 present in this individual (Fig 8D-E).

1053

#### 1054 **The cross-section of the midshaft of MMNS VP-7649**

1055 The cortex of the MMNS VP-7649 midshaft is predominantly composed of a woven-fiber  
1056 matrix dominated by reticular and plexiform vascularization and areas of increased density of  
1057 radial canals (Fig 8G). There are few to no secondary osteons throughout the cortex except for a  
1058 localized zone of secondary osteons across an endosteal-periosteal gradient in the anterolateral  
1059 region (Fig 8F). Unlike the metatarsal MMNS VP-6332, there is no evidence of substantial  
1060 cortical drift in the tibial section (MMNS VP-7649) via uneven expansion of the medullary cavity  
1061 (Fig 8F). The thickness of the cortex appears relatively consistent relative to the large medullary  
1062 cavity, although the medial side is thicker on average. There is zonation in the vascularity of the  
1063 outer cortex, most notably near the outer region of the lateral cortex beginning with the fourth  
1064 LAG (Fig 8G). Whereas much of the inner cortex is highly vascularized up to the fourth LAG, the  
1065 cortex between the fourth LAG and the periosteum is less densely vascularized, as evidenced by  
1066 the presence of fewer vascular canals (Fig 8G). Six LAGs are present from the innermost  
1067 endosteal region to the periosteal surface, representing at least seven growth cycles, and the third

1068 and fourth LAGs contain a couplet (Fig 8G). LAG spacing is inconsistent throughout the cortex  
1069 of MMNS VP-7649, but generally decreases substantially, with wide spacing between LAGs in  
1070 the inner cortex and tighter, decreasing spacing in the outer cortex (Fig 8G-H). There is no  
1071 definitive presence of the EFS in the periosteum (Fig 8G-I).

1072

## 1073 **Discussion**

1074 Ornithomimosaur repeatedly evolved gigantic body size during their evolutionary history  
1075 [14,70,114–116] (Fig 9), although evidence for directional mass evolution, as opposed to  
1076 stochastic processes, is lacking [117]. Early-diverging ornithomimosaur from the Early  
1077 Cretaceous (pre-Albian), such as *Nqwebasaurus thwazi* [93] from Africa, *Hexing qingyi* [103],  
1078 *Shenzhousaurus orientalis* [104], and *Kinnareemimus khonkaenensis* [105] from Asia,  
1079 *Pelecanimimus polyodon* [106] from Europe, and *Nedcolbertia justinhofmanni* [107] from North  
1080 America) were universally small bodied (>12 kg [102; table S1]). During the Albian,  
1081 ornithomimosaur generally embarked on a trend of increasing body size, although a mosaic of  
1082 small, medium, and large bodied species existed (Figs 2 and 9). This is known, in part, based on  
1083 ornithomimosaur remains from the Cloverly Formation [108] and Arundel Clay [15], *H.*  
1084 *okladnikovi* from Mongolia [109] (all small to medium-bodied species), as well as the earliest  
1085 examples of large bodied species with some taxa, such as *A. fridayi* in North America [14] and *B.*  
1086 *grandis* in Asia [70], exceeding 350 kg [37] (S1 Table). By the end of the Cretaceous  
1087 (Campanian-Maastrichtian), multiple large-bodied species are known to have inhabited Laurasian  
1088 landmasses, including the deinocheirid *Paraxenisaurus normalensis*, from the Campanian Cerro  
1089 del Pueblo Formation of Mexico, indeterminate large-bodied ornithomimid materials from the  
1090 Dinosaur Park Formation, Canada [25,27,116,125,126] and *G. bullatus* (MPC-D 100/11) from the  
1091 Nemegt Formation of Mongolia [64]. Moreover, by this time ornithomimosaur had achieved

1092 gigantism, as exemplified by *D. mirificus* (MPC-D 100/127), which is estimated to have weighed  
1093 over 6,000 kg [110] (S1 Table).

1094

1095 **Fig 9. Relative body-size of the Eutaw ornithomimosaur and geologic age of known**

1096 **ornithomimosaur taxa.** Estimated relative body sizes are based on the femoral lengths data  
1097 obtained from Zanno and Makovicky [117]. All silhouettes are *Ornithomimus*, except for *D.*  
1098 *mirificus*. Yellow silhouettes indicate that the relative body mass is estimated from fragmentary  
1099 elements. Silhouette courtesy Mr. Keiji Terakoshi.

1100

1101

1102 Despite an increase in our understanding of ornithomimosaurian body size evolution  
1103 during the Cretaceous period, substantial gaps persist. The North American specimen record is  
1104 poor between the Albian and Campanian [27,125]; similarly, little is known about  
1105 ornithomimosaur mass evolution between the Turonian/Coniacian and Maastrichtian across Asia.  
1106 The presence of large-bodied Eutaw ornithomimosaur from the Santonian of Mississippi fills a  
1107 gap in the record of body size evolution of ornithomimosaur in North America and further  
1108 suggests the presence of coexisting large- and small/medium-bodied forms in the region during  
1109 this time (Figs 2 and 9).

1110 Using extant-scaling approaches from estimated femur circumferences, we estimate the  
1111 body mass range of three individuals within our Eutaw sample. The upper and the lower bounds  
1112 for each of these three individuals are ranged between 607-1025 kg for MMNS VP-6332, 6790-  
1113 11470 kg for MMNS VP-7119, and 136-230 kg for MMNS VP-7649, when *D. mirificus* is  
1114 included in the regression. Conversely, the upper and the lower bounds for the same individuals  
1115 are estimated at 221-374 kg for MMNS VP-6332, 884-1494 kg for MMNS VP-7119, and 105-

1116 177 kg for MMNS VP-7649, when *D. mirificus* is excluded from the regressions (S1 Table). This  
1117 is broadly consistent with the mass ranges of other large-bodied ornithomimosaur (e.g., *A.*  
1118 *fridayi*, ~380 kg; *B. grandis*, ~375 kg; *G. bullatus*, ~400 kg), which, on their maximum end, are  
1119 intermediate between the masses of these taxa and the largest ornithomimosaur *D. mirificus*  
1120 (~6350 kg) (see S1 Table for comparative mass estimates using this and other mass estimation  
1121 approaches). However, body mass estimation of the smaller individual (MMNS VP-7649) is  
1122 consistent with the size of the reported late-diverging ornithomimosaur taxa from the Late  
1123 Cretaceous of North America (S1 Table). It should also be emphasized that the regressions  
1124 performed to estimate the FCs (and subsequently estimate BM) used different elements, based on  
1125 the availability of material from MMNS VP-6332 (metatarsal), MMNS VP-7119 (pedal phalanx),  
1126 and MMNS VP-7649 (tibia), and that each of these element experiences differing allometric  
1127 effects that can impact the accuracy when predicting values that are substantially larger than the  
1128 original data used to perform the regression. This may be partially responsible for the particularly  
1129 large FC and BM estimates in MMNS VP-7119, when compared to the estimates in MMNS VP-  
1130 7649 and MMNS VP-6332.

1131         Among large-bodied ornithomimosaur, growth data based on bone histology is limited to  
1132 *B. grandis* [70]. Based on a cross-section of the fibular shaft, the holotype specimen of *B. grandis*  
1133 belongs to an individual that was at least 13–14 years old and actively growing, although  
1134 approaching somatic maturity, at the time of death. Our osteohistological data suggests that the  
1135 second metatarsal MMNS VP-6332 belongs to an individual minimally 10 years old and still  
1136 growing at death (Fig 3C-D). Decreasing LAG spacing toward the periosteal surface, and the  
1137 absence of an EFS, suggests a subadult individual of similar relative growth stage as *B. grandis*.

1138         Cullen and colleagues [113] performed multi-element osteohistological analysis on the  
1139 hind limb elements of the Dry Island ornithomimid specimens to assess intra- and interskeletal

1140 variations, such as the difference in the number of LAGs within different elements of the same  
1141 individual. They documented that in that sample, the fibula generally preserved one more LAG  
1142 than the femur, tibia, or metatarsal, although this pattern was not always true in histological  
1143 samplings among theropods more broadly [90,113,127]. Using this relationship to qualitatively  
1144 approximate the number of missing LAGs and ontogenetic age in years, we find that the  
1145 estimated age and size are grossly similar between these two taxa, with the likelihood that the  
1146 Eutaw taxon represented by MMNS VP-6332 would be substantially larger at skeletal maturity,  
1147 even if it stopped growing at a younger age. For comparison, the holotype of *B. grandis* is  
1148 estimated at ~13–14 years of age and ~375 kg (based on extant-scaling approaches using femoral  
1149 circumference; see S1 Table), and the Eutaw ornithomimosaur represented by the second  
1150 metatarsal (MMNS VP-6332) is estimated as at least 11 years of age (estimating for missing  
1151 LAGs and metatarsal-fibular growth mark record differences) and weighing ~816 kg based on  
1152 extant-scaling approaches using femoral circumference (see S1-S2 Tables for other mass  
1153 estimates).

1154         In contrast, the tibia (MMNS VP-7649) from our Eutaw ornithomimosaur assemblage  
1155 likely represents a distinct and smaller-bodied taxon. This specimen preserves seven growth  
1156 cycles (Fig 8G), compared to the 10 preserved by the second metatarsal (MMNS VP-6332) (Fig  
1157 8D), yet belongs to an individual with a body mass estimated to be ~20-50% the body mass of  
1158 MMNS VP-6332 (depending on inclusion/exclusion of *D. mirificus* in predictive FC and BM  
1159 dataset for Eutaw specimens; Fig 9 and S1 Fig; Table 1 and S1 Table). The combination of  
1160 osteohistological and femoral circumference/mass data from our sample strongly suggests the co-  
1161 occurrence of at least two distinct ornithomimosaur taxa--one small and one large-bodied--in the  
1162 Santonian of southern Appalachia. Alternatively, it is possible that the smaller tibia represents an  
1163 earlier ontogenetic stage of the larger taxon, but we find this inconsistent with the current data

1164 given that the tibia (MMNS VP-7649) preserves closer spacing of outer LAGs and decreasing  
1165 vascular complexity (Fig 8G), suggesting that the animal was approaching maturity, despite  
1166 recording three to four fewer growth cycles than the much larger metatarsal of MMNS VP-6332.  
1167 While differences in average LAG spacing have been documented between ornithomimosaur  
1168 metatarsals and major long-bones (e.g., femora, tibiae; [76,98]), such intra-skeletal growth record  
1169 variations are unlikely to account for the substantial differences in growth mark count and mass  
1170 estimates.

1171 The coexistence of two ornithomimosaur genera is relatively common in Cretaceous  
1172 ecosystems of Laurasia [15,118,119,128,129]. Typically, co-occurrences include taxa of similar  
1173 body size (small or medium bodied) [118,119]. However, co-occurrences of both small/medium  
1174 and large-bodied ornithomimosaur genera are rare. Few examples include the Late Cretaceous  
1175 Nemegt Formation (early Maastrichtian) of Mongolia, which preserves the medium-bodied taxa  
1176 *Anserimimus planinychus* and *G. bullatus* and large-bodied taxon *D. mirificus* [115,129,130], and  
1177 the Dinosaur Park Formation (mid to late Campanian) of Canada, including the medium-bodied  
1178 taxa *O. velox* and *S. altus*, and potentially also an unnamed large ornithomimosaur [126].

1179 The presence of large-bodied (>350 kg) ornithomimosaur taxa from the late Early  
1180 Cretaceous through Maastrichtian of North America including *A. fridayi* from the Aptian/Albian  
1181 of Arkansas, a proximal tibia (SMU 76809) of large ornithomimosaur from the Cenomanian  
1182 Lewisville Formation of Texas [22], Ornithomimosauria indet. materials described herein from  
1183 the Santonian of Mississippi, *P. normalensis* from the Campanian of Mexico, and a large  
1184 unnamed ornithomimid (LACM 47520) from the late Maastrichtian Hell Creek Formation of  
1185 Montana, together with Asian representatives from the Early Cretaceous (*B. grandis*) and the Late  
1186 Cretaceous (*D. mirificus* and *G. bullatus*) of China and Mongolia, indicate that large-bodied

1187 ornithomimosaur had achieved a near pan-Laurasian distribution by the post-Aptian Cretaceous  
1188 (post-Aptian).

1189

## 1190 **Conclusions**

1191 To date, the assemblage of ornithomimosaur materials from the Santonian Eutaw  
1192 Formation are some of the best-preserved theropod materials known from Upper Cretaceous  
1193 sediments of Appalachia. Specimens described herein add essential new information to the poorly  
1194 known mid-Cretaceous interval from the Appalachian landmass by filling a critical gap in the  
1195 spatiotemporal and biodiversity records of ornithomimosaur in North America, documenting the  
1196 youngest occurrence of ornithomimosaur in Appalachia (during an interval of faunal isolation),  
1197 the only definitive Santonian record of ornithomimosaur on the North American continent, and  
1198 one of the largest ornithomimosaurian species known globally. This record, when combined with  
1199 the previously described Arundel Clay ornithomimosaur, *A. fridayi*, and a partial tibia of a large  
1200 unnamed ornithomimosaur from the Lewisville Formation of Texas, confirm that  
1201 ornithomimosaur dinosaurs were present in Appalachia throughout the early Late Cretaceous.

1202 Previous studies on the dissociated ornithomimosaur specimens have demonstrated that  
1203 manual and/or pedal elements of ornithomimosaur are important source of taxonomically  
1204 informative anatomical information and can be diagnostic for Ornithomimosauria [30,65,126].  
1205 This is supported by several studies describing ornithomimosaurians on the basis of solely manual  
1206 or pedal elements, for example *A. tugrikinesis*, *A. planinychus*, *A. fridayi*, *P. normalensis*, and *T.*  
1207 *packardensis* [14,62,92,116,131]. Despite this, the likelihood of more than one co-occurring taxon  
1208 in the Eutaw assemblage, coupled with a lack of association between elements, and the presence  
1209 of pathologies, prevents us from confidently assigning the Eutaw specimens to finer taxonomic  
1210 levels, such as a species, in this time. Nonetheless, the presence of two ornithomimosaur taxa in

1211 the Santonian Eutaw assemblage, based on the combined size and growth data presented herein, is  
1212 consistent with Campanian-Maastrichtian assemblages of the North America and Asia [115,129],  
1213 suggesting that multiple species of ornithomimosaurian theropods likely cohabited within  
1214 Laurasian ecosystems throughout the latter half of the Late Cretaceous. Due to gaps in the fossil  
1215 record, it is currently unclear if this pattern is related to the evolution of large body size (>350 kg)  
1216 among some ornithomimosaurians initiating in the Aptian/Albian (e.g., *B. grandis*, *A. fridayi*).  
1217 Evolution of large body size in select taxa would be expected to correlate with a niche shift and  
1218 such a trend could explain the presence of multiple ornithomimosaur taxa in Late Cretaceous  
1219 ecosystems, as well as the lack of evidence for directional evolution in body mass via the co-  
1220 occurrence of multiple clades of different sized ornithomimosaurians through geologic time. It is  
1221 interesting that some of the largest ornithomimosaurians known from North America stem from an  
1222 interval of high sea-level and reduced range area (Santonian). Robust paleobiogeographic  
1223 analyses that would elucidate patterns of ornithomimosaurian dispersal across Laurasian  
1224 landmasses up to the Turonian (specifically between North America and East Asia during the  
1225 mid-Cretaceous, a.k.a EKLInE, [122]) must await the discovery of additional and more complete  
1226 material. The same is true regarding population isolation in Laramidia and Appalachia on and its  
1227 effect on evolutionary trajectories in body-size.

1228

## 1229 **Acknowledgments**

1230 We gratefully acknowledge those who collected and donated the materials used in this  
1231 project to public repositories including Eric Loftis, Jason Robinson, Wilkie Collins, Joe Gibson,  
1232 Neal Larson, David Troskey, Chuck Ciampaglio, Pete Larson, and James Lamb. We also express  
1233 our gratitude to the landowners Keith and Meredith Hester and Richard Fleming, as well as the  
1234 City of Columbus, for unrestricted access to the fossil exposures along Luxapallila Creek. We



1235 also thank the following people: Lisa Herzog and Aurore Canoville (Paleontological Research  
1236 Laboratory, NC Museum of Natural Sciences) for assistance with the procedures of  
1237 molding/casting and histological samplings, respectively; Greg Funston (University of  
1238 Edinburgh), Yoshitsugu Kobayashi, and Philip Currie (University of Alberta) for sharing their  
1239 specimen photos and useful for the comparisons; Adrian Smith (Evolutionary Biology &  
1240 Behavior Laboratory, Natural Research Center, NC Museum of Natural Sciences) for providing  
1241 facilities necessary for microscopic investigations; and Rebecca Hunt (BLM, Canyon Country  
1242 District, Utah), Thomas Holtz (University of Maryland), Terry Gates (NC State University), Ryuji  
1243 Takasaki (Okayama University of Sciences), Junki Yoshida (Fukushima Museum), and Gregory  
1244 S. Paul for helpful discussions on the earlier versions of the manuscript and during the annual  
1245 meeting of the Society of Vertebrate Paleontology. We are grateful to Keiji Terakoshi for  
1246 permission to use the silhouette image of *Ornithomimus*. Funding was provided by the NC  
1247 Museum of Natural Sciences and the Mississippi Museum of Natural Science.

1248

## 1249 **References**

- 1250 1. Carpenter K. The Oldest Late Cretaceous dinosaurs in North America? *Mississippi Geol.*  
1251 1982;3: 1–7.
- 1252 2. Russell DA. China and the lost worlds of the dinosaurian era. *Hist Biol.* 1995;10: 3–12.
- 1253 3. Schwimmer DR. *King of the Crocodylians: The Paleobiology of Deinonychus*.  
1254 Bloomington, IN: Indiana University Press; 2002.
- 1255 4. Horner JR, Weishampel DB, Forster CA. Hadrosauridae. *The Dinosauria*. Weishampel DB,  
1256 Dodson P, Osmólska H, editors. Berkeley: University of California Press; 2004.
- 1257 5. Langston WJ. The vertebrate fauna of the Selma Formation of Alabama Part VI: The  
1258 dinosaurs. *Fteldiana Geol Mem.* 1960;3: 319–360.
- 1259 6. Weishampel DB. Another look at the dinosaurs of the East Coast of North America.  
1260 *Coletivo Arqueológico-Paleontológico Salense*. Burgos, Spain: Actas III Jornadas  
1261 *Dinosaurios Entorno*; 2006. pp. 129–168.

- 1262 7. Baird D, Horner JR. A fresh look at the dinosaurs of New Jersey and Delaware. *Bull New*  
1263 *Jersey Acad Sci.* 1977;22: 50.
- 1264 8. Gates TA, Prieto-Márquez A, Zanno LE. Mountain Building Triggered Late Cretaceous  
1265 North American Megaherbivore Dinosaur Radiation. Dodson P, editor. *PLoS One.* 2012;7:  
1266 e42135. doi:10.1371/journal.pone.0042135
- 1267 9. Horner JR. Upper Cretaceous dinosaurs from the Bearpaw Shale (marine) of south-central  
1268 Montana, with a checklist of Upper Cretaceous dinosaur remains from marine sediments in  
1269 North America. *J Paleontol.* 1979;53: 566–577.
- 1270 10. Schwimmer DR. Late Cretaceous dinosaurs in Eastern USA: A taphonomic and  
1271 biogeographic model of occurrences. In: Wolberg E, Stump E, editors. *Dinofest*  
1272 *International Proceedings.* Philadelphia Academy of Natural Sciences, Philadelphia; 1997.  
1273 pp. 203–211.
- 1274 11. Carr TD, Williamson TE, Schwimmer DR. A new genus and species of tyrannosauroid  
1275 from the Late Cretaceous (Middle Campanian) Demopolis Formation of Alabama. *J*  
1276 *Vertebr Paleontol.* 2005;25: 119–143.
- 1277 12. Prieto-Marquez A, Erickson GM, Ebersole JA. A primitive hadrosaurid from southeastern  
1278 North America and the origin and early evolution of ‘duck-billed’ dinosaurs. *J Vertebr*  
1279 *Paleontol.* 2016;36: e1054495. doi:10.1080/02724634.2015.1054495
- 1280 13. Farke AA, Phillips GE. The first reported ceratopsid dinosaur from eastern North America  
1281 (Owl Creek Formation, Upper Cretaceous, Mississippi, USA). *PeerJ.* 2017;5: e3342.  
1282 doi:10.7717/peerj.3342
- 1283 14. Hunt RK, Quinn JH. A new ornithomimosaur from the Lower Cretaceous Trinity Group of  
1284 Arkansas. *J Vertebr Paleontol.* 2018;38: e1421209. doi:10.1080/02724634.2017.1421209
- 1285 15. Brownstein CD. Description of Arundel Clay ornithomimosaur material and a  
1286 reinterpretation of *Nedcolbertia justinhofmanni* as an “Ostrich Dinosaur”: biogeographic  
1287 implications. *PeerJ.* 2017;5: e3110. doi:10.7717/peerj.3110
- 1288 16. Brownstein C. A tyrannosauroid metatarsus from the Merchantville formation of Delaware  
1289 increases the diversity of non-tyrannosaurid tyrannosauroids on Appalachia. *PeerJ.* 2017;5:  
1290 e4123. doi:10.7717/peerj.4123
- 1291 17. Brownstein C. Dinosaurs from the Santonian–Campanian Atlantic coastline substantiate  
1292 phylogenetic signatures of vicariance in Cretaceous North America. *R Soc Open Sci.*  
1293 2021;8: 210127. doi:10.1098/rsos.210127
- 1294 18. Gallagher WB. The Cretaceous-Tertiary mass extinction event in North Atlantic Coastal  
1295 Plain. *The Mosasaur.* 1993;5: 75–154.
- 1296 19. Ebersole SM, King JL. A review of non-avian dinosaurs from the Late Cretaceous of  
1297 Alabama, Mississippi, Georgia, and Tennessee. *Bull Alabama Museum Nat Hist.* 2011;28:  
1298 81–93.

- 1299 20. Schimmer DR, Sanders AE, Erickson BR, Weems RE, Schwimmer DR, Sanders AE, et al.  
1300 A Late Cretaceous Dinosaur and Reptile Assemblage from South Carolina, USA. *Trans*  
1301 *Am Philos Soc.* 2015;105: 1–157.
- 1302 21. Longrich NNR. A ceratopsian dinosaur from the Late Cretaceous of eastern North  
1303 America, and implications for dinosaur biogeography. *Cretac Res.* 2016;57: 199–207.  
1304 doi:10.1016/j.cretres.2015.08.004
- 1305 22. Noto CR, D’Amore DC, Drumheller SK, Adams TL. A newly recognized theropod  
1306 assemblage from the Lewisville Formation (Woodbine Group; Cenomanian) and its  
1307 implications for understanding Late Cretaceous Appalachian terrestrial ecosystems. *PeerJ.*  
1308 2022;10: e12782. doi:10.7717/peerj.12782
- 1309 23. Brownstein C. The biogeography and ecology of the Cretaceous non-avian dinosaurs of  
1310 Appalachia. *Palaeontol Electron.* 2018;21: 1–56. doi:10.26879/801
- 1311 24. Russell DA. Ostrich dinosaurs from the Late Cretaceous of Western Canada. *Can J Earth*  
1312 *Sci.* 1972;9: 375–402.
- 1313 25. Makovicky PJ, Kobayashi Y, Currie PJ. Ornithomimosauria. 1st ed. In: Weishampel DB,  
1314 Dodson P, Osmólska H, editors. *The Dinosauria*. 1st ed. Berkeley: University of California  
1315 Press [AQ1]; 2004. pp. 137–150. Available: <http://dinosauria.ucpress.edu>.
- 1316 26. Weishampel DB, Dodson P, Osmólska H. *The Dinosauria*. 2nd ed. Weishampel DB,  
1317 Dodson P, Osmólska H, editors. University of California Press [AQ1]; 2004.
- 1318 27. Weishampel DB, Barrett PM, Coria RA, Le Loeuff J, Xu X, Zhao X, et al. Dinosaur  
1319 distribution. 2nd ed. In: Weishampel DB, Dodson P, Osmólska H, editors. *The Dinosauria*.  
1320 2nd ed. Berkeley: University of California Press [AQ1]; 2004. pp. 517–606.
- 1321 28. Weishampel DB, Young L. *Dinosaurs of the East Coast*. Baltimore, MD: John Hopkins  
1322 University Press; 1996.
- 1323 29. Gilmore CW. Osteology of the carnivorous Dinosauria in the United States National  
1324 Museum, with special reference to the *Antrodemus* (*Allosaurus*) and *Ceratosaurus*. *Bull*  
1325 *United States Natl Museum.* 1920;110: 1–159.
- 1326 30. McFeeters B, Ryan MJ, Cullen TM. Positional Variation in Pedal Ungulas of North  
1327 American Ornithomimids (Dinosauria, Theropoda): A Response to Brownstein (2017).  
1328 *Vertebr Anat Morphol Palaeontol.* 2018;5. doi:10.18435/vamp29283
- 1329 31. Dowsett HJ. Documentation of the Santonian-Campanian and Austinian-Tayloran stage  
1330 boundaries in Mississippi and Alabama using calcareous microfossils. *U S Geol Surv Bull.*  
1331 1989;1884: 1–20.
- 1332 32. Kennedy WJ, Cobban WA. Upper Cretaceous (upper Santonian) *Boehmoceras* fauna from  
1333 the Gulf Coast region of the United States. *Geol Mag.* 1991;128: 167–189.
- 1334 33. Mancini EA, Puckett TM, Tew BH. Integrated biostratigraphic and sequence stratigraphic  
1335 framework for Upper Cretaceous strata of the eastern Gulf Coastal Plain, USA. *Cretac Res.*

- 1336 1996;17: 645–669.
- 1337 34. Puckett TM. Santonian-Maastrichtian planktonic foraminiferal and ostracode  
1338 biostratigraphy of the northern Gulf Coastal Plain, USA. *Stratigraphy*. 2005;2: 117–146.
- 1339 35. Lamm ET. Preparation and sectioning of specimens. In: Kevin Padian, E.T. Lamm, editors.  
1340 Bone Histology of Fossil Tetrapods. Berkeley, California: University of California Press;  
1341 2013. pp. 55–160.
- 1342 36. Campione NE, Evans DC. The accuracy and precision of body mass estimation in  
1343 non-avian dinosaurs. *Biol Rev*. 2020;95: 1759–1797. doi:10.1111/brv.12638
- 1344 37. Campione NE, Evans DC, Brown CM, Carrano MT. Body mass estimation in non-avian  
1345 bipeds using a theoretical conversion to quadruped stylopodial proportions. Revell L,  
1346 editor. *Methods Ecol Evol*. 2014;5: 913–923. doi:10.1111/2041-210X.12226
- 1347 38. Erickson GM, Tumanova TA. Growth curve of *Psittacosaurus mongoliensis* Osborn  
1348 (*Ceratopsia: Psittacosauridae*) inferred from long bone histology. *Zool J Linn Soc*.  
1349 2000;130: 551–566.
- 1350 39. Stephenson LW, Monroe WH. The Upper Cretaceous deposits. *Mississippi Off Geol Bull*.  
1351 1940;40: 1–296.
- 1352 40. Russell EE, Keady DM. Geologic mapping in Mississippi. Proceedings of the 1989  
1353 MISGEOMAP Conference 3. Mississippi Department of Environmental Quality Bureau of  
1354 Geology Circular; 1990. pp. 15–16.
- 1355 41. Hilgard EW. Report on the geology and agriculture of the State of Mississippi. Jackson,  
1356 Mississippi; 1860.
- 1357 42. Dockery DT, Thompson DE. The geology of Mississippi. 2016; 751.
- 1358 43. Cicimurri DJ, Ciampaglio CN, Runyon KE. Late Cretaceous Elasmobranchs from the  
1359 Eutaw Formation at Luxapalila creek, Lowndes County, Mississippi. *PalArch's J Vertebr*  
1360 *Palaeontol*. 2014;11: 1–36.
- 1361 44. Kaye JM. Certain aspects of the geology of Lowndes County, Mississippi. Mississippi  
1362 State University. 1955.
- 1363 45. Soen DD. Stratigraphy and sedimentology of the Tombigbee Sand Member, Eutaw  
1364 Formation (Cretaceous--Campanian Stage), of northeastern Mississippi. MS thesis.  
1365 University of Alabama. 1984.
- 1366 46. Cook PR. Sedimentary structures as possible indicators of environment in the McShan  
1367 Formation (Upper Cretaceous) in Mississippi and Alabama. Mississippi State University,  
1368 Starkville. 1986.
- 1369 47. Monroe WH, Conant LC, Eargle DH. Pre-Selma Upper Cretaceous stratigraphy of western  
1370 Alabama. *Am Assoc Pet Geol Bull*. 1946;30: 187–212.

- 1371 48. Becker MA, Slattery W, Chamberlain JA. Mixing of Santonian and Campanian  
1372 chondrichthyan and ammonite microfossils along a transgressive lag deposit, Greene  
1373 County, western Alabama. *Southeast Geol.* 1998;37: 205–216.
- 1374 49. Ciampaglio CN, Cicimurri DJ, Ebersole JA, Runyon KE. A Note on Late Cretaceous Fish  
1375 Taxa Recovered from Stream Gravels at Site AGr-43 in Greene County, Alabama.  
1376 *Alabama Museum Nat Hist Bull* 31. 2013;1: 84–97.
- 1377 50. Puckett TM. Geology of the Eutaw 7.5-minute quadrangle, Greene County, Alabama. *Geol*  
1378 *Surv Alabama Quadrang Ser Map.* 1997;15: 1–9.
- 1379 51. Phillips GE, Loftis E. A Significant Late Santonian (Upper Cretaceous) vertebrate fossil  
1380 site in Lowndes Co., Mississippi. 63rd Annual Meeting of Mississippi Academy of  
1381 Sciences. 1999. p. 43.
- 1382 52. Harrell TL, Ehret DJ. Lungfish tooth plates (Sarcopterygii, Dipnoi) from the Late  
1383 Cretaceous (Santonian) Eutaw Formation of Alabama and Mississippi, USA. *J Paleontol.*  
1384 2019;93: 531–542. doi:10.1017/jpa.2018.91
- 1385 53. Castro JI. The shark nursery of Bulls Bay, South Carolina, with a review of the shark  
1386 nurseries of the southeastern coast of the United States. *Environ Biol Fishes.* 1993;38: 37–  
1387 48.
- 1388 54. Richard Owen. Report on British fossil reptiles. Part II. *Rep Br Assoc Adv Sci.* 1842;11:  
1389 60–204.
- 1390 55. Marsh OC. Classification of the Dinosauria. *Am J Sci Third Ser.* 1881;23: 81–86.
- 1391 56. Barsbold R. On the evolution and systematics of the late Mesozoic carnivorous dinosaurs  
1392 [in Russia]. *Paleontol Biostratigrafia Mongolii Tr Sovm Sov-Mong Paleontol Eksped.*  
1393 1976;3: 68–75.
- 1394 57. Zanno LE, Varricchio DJ, O'Connor PM, Titus AL, Knell MJ. A New Troodontid  
1395 Theropod, *Talos sampsoni* gen. et sp. nov., from the Upper Cretaceous Western Interior  
1396 Basin of North America. Lalueza-Fox C, editor. *PLoS One.* 2011;6: e24487.  
1397 doi:10.1371/journal.pone.0024487
- 1398 58. Tsuihiji T, Barsbold R, Watabe M, Tsogtbaatar K, Chinzorig T, Fujiyama Y, et al. An  
1399 exquisitely preserved troodontid theropod with new information on the palatal structure  
1400 from the Upper Cretaceous of Mongolia. *Naturwissenschaften.* 2014;101: 131–142.  
1401 doi:10.1007/s00114-014-1143-9
- 1402 59. Zanno LE. Osteology of *Falcarius utahensis* (Dinosauria: Theropoda): characterizing the  
1403 anatomy of basal therizinosaurs. *Zool J Linn Soc.* 2010;158: 196–230. doi:10.1111/j.1096-  
1404 3642.2009.00464.x
- 1405 60. Xu L, Kobayashi Y, Lü J, Lee Y-N, Liu Y, Tanaka K, et al. A new ornithomimid dinosaur  
1406 with North American affinities from the Late Cretaceous Quipa Formation in Henan  
1407 province of China. *Cretac Res.* 2011;32: 213–222.

- 1408 61. Claessens LPAM, Loewen MA. A redescription of *Ornithomimus velox* Marsh, 1890  
1409 (Dinosauria, Theropoda). *J Vertebr Paleontol.* 2015; e1034593.  
1410 doi:10.1080/02724634.2015.1034593
- 1411 62. Chinzorig T, Yoshitsugu K, Tsogtbaatar K, Currie PJ, Mahito W, Rinchen B, et al. First  
1412 Ornithomimid (Theropoda, Ornithomimosauria) from the Upper Cretaceous Djadokhta  
1413 Formation of Tögrögiin Shiree, Mongolia. *Sci Rep.* 2017;7: 1–14. doi:10.1038/s41598-  
1414 017-05272-6
- 1415 63. Brochu CA. Osteology of *Tyrannosaurus rex* : Insights from a nearly complete skeleton  
1416 and high-resolution computed tomographic analysis of the skull. *J Vertebr Paleontol.*  
1417 2003;22: 1–138. doi:10.1080/02724634.2003.10010947
- 1418 64. Osmólska H, Roniewicz E, Barsbold R. a new dinosaur, *Gallimimus bullatus* n. gen. , n. sp.  
1419 (Ornithomimidae) from the Upper Cretaceous of Mongolia. *Acta Palaeontol Pol.* 1972;27:  
1420 103–143.
- 1421 65. Shapiro MD, You H, Shubin NH, Luo Z, Downs JP. A large ornithomimid pes from the  
1422 Lower Cretaceous of the Mazongshan area, Northern Gansu province, People’s Republic of  
1423 China. *J Vertebr Paleontol.* 2003;23: 695–698.
- 1424 66. Lamanna MC, Sues H-D, Schachner ER, Lyson TR. A New Large-Bodied  
1425 Oviraptorosaurian Theropod Dinosaur from the Latest Cretaceous of Western North  
1426 America. Evans DC, editor. *PLoS One.* 2014;9: e92022. doi:10.1371/journal.pone.0092022
- 1427 67. Xu X, Tan Q, Wang J, Zhao X, Tan L. A gigantic bird-like dinosaur from the Late  
1428 Cretaceous of China. *Nature.* 2007;447: 844–847. doi:10.1038/nature05849
- 1429 68. Brusatte SL, Choiniere JN, Benson RB, Carr TD, Norell MA. Theropoda dinosaurs from  
1430 the Late Cretaceous of Eastern North America: anatomy, systematics, biogeography and  
1431 new information from historic specimens. *J Vertebr Paleontol.* 2012;32: 70.
- 1432 69. Funston GF, Persons WS, Bradley GJ, Currie PJ. New material of the large-bodied  
1433 caenagnathid *Caenagnathus collinsi* from the Dinosaur Park Formation of Alberta, Canada.  
1434 *Cretac Res.* 2015;54: 179–187. doi:10.1016/j.cretres.2014.12.002
- 1435 70. Makovicky PJ, Li D, Gao K-QKQ, Lewin M, Erickson GM, Norell MA. A giant  
1436 ornithomimosaur from the early cretaceous of China. *Proc R Soc B Biol Sci.* 2009;277:  
1437 191–198. doi:10.1098/rspb.2009.0236
- 1438 71. Brusatte SL, Norell MA, Carr TD, Erickson GM, Hutchinson JR, Balanoff AM, et al.  
1439 *Tyrannosaur Paleobiology: New Research on Ancient Exemplar Organisms.* *Science (80- )*.  
1440 2010;329: 1481–1485. doi:10.1126/science.1193304
- 1441 72. Brusatte SL, Averianov A, Sues H-D, Muir A, Butler IB. New tyrannosaur from the mid-  
1442 Cretaceous of Uzbekistan clarifies evolution of giant body sizes and advanced senses in  
1443 tyrant dinosaurs. *Proc Natl Acad Sci.* 2016;113: 3447–3452. doi:10.1073/pnas.1600140113
- 1444 73. Peacock B, Wilson JA, Hernandez-Rivera R, Montellano-Ballesteros M, Wilson GP. First  
1445 tyrannosaurid remains from the Upper Cretaceous “El Gallo” Formation of Baja California,



- 1446 México. *Acta Palaeontol Pol.* 2014. doi:10.4202/app.2012.0003
- 1447 74. McFeeters B, Ryan MJ, Schröder-Adams C, Cullen TM. A new ornithomimid theropod  
1448 from the Dinosaur Park Formation of Alberta, Canada. *J Vertebr Paleontol.* 2016;4634:  
1449 e1221415. doi:10.1080/02724634.2016.1221415
- 1450 75. Macdonald I, Currie PJ. Description of a partial *Dromiceiomimus* (Dinosauria: Theropoda)  
1451 skeleton with comments on the validity of the genus. *Can J Earth Sci.* 2019;56: 129–157.  
1452 doi:10.1139/cjes-2018-0162
- 1453 76. Marsh OC. Description of a new dinosaurian reptile. *Am J Sci.* 1890;3: 81–86.
- 1454 77. Dalman SG, Jasinski SE, Lucas SG. First occurrence of a tyrannosauroid dinosaur from the  
1455 Lower Campanian Merchantville Formation of Delaware, USA. *Mem Fukui Prefect*  
1456 *Dinosaur Museum.* 2017;16: 29–38.
- 1457 78. Barsbold R, Osmólska H. *Ornithomimosauria. The Dinosauria.* California University Press;  
1458 1990. pp. 225–244.
- 1459 79. Funston G. *Caenagnathids of the Dinosaur Park Formation (Campanian) of Alberta,*  
1460 *Canada: anatomy, osteohistology, taxonomy, and evolution.* *Vertebr Anat Morphol*  
1461 *Palaeontol.* 2020;8: 105–153. doi:10.18435/vamp29362
- 1462 80. Kobayashi Y, Barsbold R. Anatomy of *Harpymimus okladnikovi* Barsbold and Perle 1984  
1463 (*Dinosauria; Theropoda*) of Mongolia. In: Carpenter K, editor. *The carnivorous dinosaurs.*  
1464 *Indianapolis: Indiana University Press; 2005. pp. 97–126.*
- 1465 81. Ostrom JH. Functional morphology and evolution of the ceratopsian dinosaurs. *Evolution*  
1466 (N Y). 1966;20: 290–308.
- 1467 82. Barsbold Rinchen. Carnivorous dinosaurs from the Cretaceous of Mongolia. *Trans Jt Sov*  
1468 *Paleontol Exped.* 1983;19: 5–119.
- 1469 83. Norell MA, Makovicky PJ. Important features of the dromaeosaur skeleton: Information  
1470 from a new specimen. *Am Museum Novit.* 1997;3215: 1–28.
- 1471 84. Norell MA, Makovicky PJ. Important features of the dromaeosaur skeleton. II. Information  
1472 from newly collected specimens of *Velociraptor mongoliensis*. *Am Museum Novitates*1.  
1473 1999;3282: 1–45.
- 1474 85. Mader BJ, Bradley RL. A redescription and revised diagnosis of the syntypes of the  
1475 Mongolian tyrannosaur *Alectrosaurus olseni*. *J Vertebr Paleontol.* 1989;9: 41–55.  
1476 doi:10.1080/02724634.1989.10011737
- 1477 86. Zanno LE, Tucker RT, Canoville A, Avrahami HM, Gates TA, Makovicky PJ. Diminutive  
1478 fleet-footed tyrannosauroid narrows the 70-million-year gap in the North American fossil  
1479 record. *Commun Biol.* 2019;2: 64. doi:10.1038/s42003-019-0308-7
- 1480 87. Lambe LM. The Cretaceous Theropodous Dinosaur *Gorgosaurus*. *Geol Surv.* 1917;83: 1–  
1481 85.

- 1482 88. Maleev EA. Giant carnivorous dinosaurs of Mongolia. Dokl Acad Sci USSR. 1955;104:  
1483 634–637.
- 1484 89. van der Reest AJ, Currie PJ. Troodontids (Theropoda) from the Dinosaur Park Formation,  
1485 Alberta, with a description of a unique new taxon: implications for deinonychosaur  
1486 diversity in North America. Can J Earth Sci. 2017;54: 919–935. doi:10.1139/cjes-2017-  
1487 0031
- 1488 90. Cullen TM, Zanno L, Larson DW, Todd E, Currie PJ, Evans DC. Anatomical,  
1489 morphometric, and stratigraphic analyses of theropod biodiversity in the Upper Cretaceous  
1490 (Campanian) Dinosaur Park Formation 1. Can J Earth Sci. 2021;58: 870–884.  
1491 doi:10.1139/cjes-2020-0145
- 1492 91. Cullen TM, Ryan MJ, Schröder-Adams C, Currie PJ, Kobayashi Y. An ornithomimid  
1493 (Dinosauria) bonebed from the Late Cretaceous of Alberta, with implications for the  
1494 behavior, classification, and stratigraphy of North American ornithomimids. PLoS One.  
1495 2013;8: 1–9.
- 1496 92. Serrano-Brañas CI, Torres-Rodríguez E, Reyes-Luna PC, González-Ramírez I, González-  
1497 León C. A new ornithomimid dinosaur from the Upper Cretaceous Packard Shale  
1498 formation (Cabullona Group) Sonora, México. Cretac Res. 2016;58: 49–62.  
1499 doi:10.1016/j.cretres.2015.08.013
- 1500 93. Makovicky PJ, Norell MA. Troodontidae. The Dinosauria. 2004. pp. 184–195.
- 1501 94. Madsen JH. *Allosaurus fragilis*: a revised osteology. 1993;109: 1–164.
- 1502 95. Currie PJ, Carpenter K. A new specimen of *Acrocanthosaurus atokensis* (Theropoda,  
1503 Dinosauria) from the Lower Cretaceous Antlers Formation (Lower Cretaceous, Aptian) of  
1504 Oklahoma, USA. GEODIVERSITAS. 2000;22: 207–246.
- 1505 96. Holtz TR. Tyrannosauroidae. 2nd ed. In: Weishampel DB, Dodson P, Osmólska H, editors.  
1506 The Dinosauria. 2nd ed. Berkeley: University of California Press [AQ1]; 2004. pp. 111–  
1507 136.
- 1508 97. Osborn HF. *Tyrannosaurus*, Upper Cretaceous carnivorous dinosaur (second  
1509 communication). Am Museum Nat Hist. 1906;22: 281–296.
- 1510 98. Perle A, Norell MA, Clark JM. A new maniraptoran Theropod—*Achillobator giganticus*  
1511 (Dromaeosauridae)—from the Upper Cretaceous of Burkhan, Mongolia". (101): 1–105.  
1512 Contrib from Geol Mineral Chair, Natl Museum Mong. 1999;101: 1–105.
- 1513 99. Barsbold R. Saurornithoididae, a new family of small theropod dinosaurs from central Asia  
1514 and North America. Palaeontol Pol. 1974;30: 5–22.
- 1515 100. Kobayashi Y, Barsbold R. Reexamination of a primitive ornithomimosaur, *Garudimimus*  
1516 *brevipes* Barsbold, 1981 (Dinosauria: Theropoda), from the Late Cretaceous of Mongolia.  
1517 Can J Earth Sci. 2005;42: 1501–1521. doi:10.1139/e05-044
- 1518 101. Osborn HF. Skeletal adaptations of *Ornitholestes*, *Struthiomimus*, *Tyrannosaurus*. Am



- 1519 Museum Nat Hist Bull. 1917;35: 733.
- 1520 102. Brusatte SL, Benson RBJ, Norell MA. The Anatomy of *Dryptosaurus aquilunguis*  
1521 (Dinosauria: Theropoda) and a Review of Its Tyrannosauroid Affinities. *Am Museum*  
1522 *Novit.* 2011;3717: 1–53.
- 1523 103. Coria RA, Currie PJ. A new carcharodontosaurid (Dinosauria, Theropoda) from the Upper  
1524 Cretaceous of Argentina. *GEODIVERSITAS.* 2006;28: 71–118.
- 1525 104. Colbert EH, Russell DA. The small Cretaceous dinosaur *Dromaeosaurus*. *Am Museum*  
1526 *Novit.* 1969;2380: 1–49.
- 1527 105. Sues H-D, Averianov A. Ornithomimidae (Dinosauria: Theropoda) from the Bissekty  
1528 Formation (Upper Cretaceous: Turonian) of Uzbekistan. *Cretac Res.* 2016;57: 90–110.  
1529 doi:10.1016/j.cretres.2015.07.012
- 1530 106. Kobayashi Y, Lü J. A new ornithomimid dinosaur with gregarious habits from the Late  
1531 Cretaceous of China. *Acta Palaeontol Pol.* 2003;48: 235–259. Available:  
1532 <http://app.pan.pl/acta48/app48-235.pdf>
- 1533 107. Choiniere JN, Forster CA, De Klerk WJ. New information on *Nqwebasaurus thwazi*, a  
1534 coelurosaurian theropod from the Early Cretaceous Kirkwood Formation in South Africa. *J*  
1535 *African Earth Sci.* 2012;71–72: 1–17.
- 1536 108. Funston GF, Chinzorig T, Tsogtbaatar K, Kobayashi Y, Sullivan C, Currie PJ. A new two-  
1537 fingered dinosaur sheds light on the radiation of Oviraptorosauria. *R Soc Open Sci.* 2020;7:  
1538 201184. doi:10.1098/rsos.201184
- 1539 109. Langer MC, Martins N de O, Manzig PC, Ferreira G de S, Marsola JC de A, Fortes E, et al.  
1540 A new desert-dwelling dinosaur (Theropoda, Noasaurinae) from the Cretaceous of south  
1541 Brazil. *Sci Rep.* 2019;9: 9379. doi:10.1038/s41598-019-45306-9
- 1542 110. Longrich NR, Barnes K, Clark S, Millar L. Caenagnathidae from the Upper Campanian  
1543 *Aguja* Formation of West Texas, and a Revision of the Caenagnathinae. *Bull Peabody*  
1544 *Museum Nat Hist.* 2013;54: 23–49. doi:10.3374/014.054.0102
- 1545 111. Ostrom JH. Osteology of *Deinonychus antirrhopus*, an unusual theropod from the Lower  
1546 Cretaceous of Montana. *Bull Peabody Museum Nat Hist.* 1969;30: 1–165.
- 1547 112. Watanabe A, Erickson GM, Druckenmiller PS. An ornithomimosaurian from the Upper  
1548 Cretaceous Prince Creek Formation of Alaska. *J Vertebr Paleontol.* 2013;33: 1169–1175.
- 1549 113. Cullen TM, Evans DC, Ryan MJ, Currie PJ, Kobayashi Y. Osteohistological variation in  
1550 growth marks and osteocyte lacunar density in a theropod dinosaur (Coelurosauria:  
1551 Ornithomimidae). *BMC Evol Biol.* 2014;14: 1–14. doi:10.1186/s12862-014-0231-y
- 1552 114. Benson RBJ, Campione NE, Carrano MT, Mannion PD, Sullivan C, Upchurch P, et al.  
1553 Correction: Rates of Dinosaur Body Mass Evolution Indicate 170 Million Years of  
1554 Sustained Ecological Innovation on the Avian Stem Lineage. *PLoS Biol.* 2014;12:  
1555 e1001896. doi:10.1371/journal.pbio.1001896

- 1556 115. Lee Y-N, Barsbold R, Currie PJ, Kobayashi Y, Lee H-J, Godefroit P, et al. Resolving the  
1557 long-standing enigmas of a giant ornithomimosaur *Deinocheirus mirificus*. *Nature*.  
1558 2014;515: 257–60. doi:10.1038/nature13874
- 1559 116. Serrano-Brañas CI, Espinosa-Chávez B, Maccracken SA, Gutiérrez-Blando C, de León-  
1560 Dávila C, Ventura JF. *Paraxenisaurus normalensis*, a large deinocheirid ornithomimosaur  
1561 from the Cerro del Pueblo Formation (Upper Cretaceous), Coahuila, Mexico. *J South Am*  
1562 *Earth Sci.* 2020;101: 102610. doi:10.1016/j.jsames.2020.102610
- 1563 117. Zanno LE, Makovicky PJ. No evidence for directional evolution of body mass in  
1564 herbivorous theropod dinosaurs. *Proc R Soc B Biol Sci.* 2013;280: 20122526.  
1565 doi:10.1098/rspb.2012.2526
- 1566 118. Jin L, Jun C, Godefroit P. A new basal ornithomimosaur (Dinosauria: Theropoda) from the  
1567 Early Cretaceous Yixian Formation, Northeast China. In: Godefroit P, editor. *Bernissart*  
1568 *Dinosaurs and Early Cretaceous Terrestrial Ecosystems*. Indiana University Press,  
1569 Bloomington, Indiana; 2012. pp. 467–487.
- 1570 119. Ji Q, Norell MA, Makovicky PJ, Gao K, Ji S, Yuan C. An early ostrich dinosaur and  
1571 implication for ornithomimosaur phylogeny. *Am Museum Novit.* 2003;3420: 1–19.
- 1572 120. Buffetaut E, Suteethorn V, Tong H. An early “ostrich dinosaur” (Theropoda:  
1573 Ornithomimosauria) from the Early Cretaceous Sao Khua Formation of NE Thailand. *Geol*  
1574 *Soc London Spec Publ.* 2009;315: 229–243. doi:10.1144/SP315.16
- 1575 121. Pérez-Moreno BP, Luis Sanz J, Buscalioni AD, Moratalla JJ, Ortega FJ, Rasskin-Gutman  
1576 D, et al. A unique multitoothed ornithomimosaur dinosaur from the Lower Cretaceous of  
1577 Spain. *Nature.* 1994;370: 363–367. doi:10.1038/370363a0
- 1578 122. Kirkland JI, Britt BB, Whittle CH, Madsen SK, Burge DL. A small coelurosaurian  
1579 theropod from the Yellow Cat Member of the Cedar Mountain Formation (Lower  
1580 Cretaceous, Barre-  
1581 mian) of eastern Utah. *Low Middle Cretac Terr Ecosyst.* 1998;New  
Mexico: 239–248.
- 1582 123. Ostrom JH. Stratigraphy and paleontology of the Cloverly Formation (Lower Cretaceous)  
1583 of the Bighorn Basin area, Wyoming and Montana. *Peabody Museum Bull.* 1970;35: 1–  
1584 234.
- 1585 124. Barsbold R, Perle A. On first new find of a primitive ornithomimosaur from the Cretaceous  
1586 of the MPR. *Paleontol Zhurnal.* 1984;2: 121–123.
- 1587 125. McFeeters B. *Evolution and Diversity of Ornithomimid Dinosaurs in the Upper Cretaceous*  
1588 *Belly River Group of Alberta*. 2015.
- 1589 126. Longrich N. A new, large ornithomimid from the Cretaceous Dinosaur Park Formation of  
1590 Alberta, Canada: Implications for the study of dissociated dinosaur remains. *Palaeontology.*  
1591 2008;51: 983–997. doi:10.1111/j.1475-4983.2008.00791.x
- 1592 127. Cullen TM, Canale JI, Apesteguía S, Smith ND, Hu D, Makovicky PJ. Osteohistological  
1593 analyses reveal diverse strategies of theropod dinosaur body-size evolution. *Proc R Soc B*

- 1594 Biol Sci. 2020;287: 20202258. doi:10.1098/rspb.2020.2258
- 1595 128. Barsbold R, Kobayashi Y, Kubota K. New discovery of dinosaur fossils from the Upper  
1596 Cretaceous Bayanshiree Formation of Mongolia. 76th Annual Meeting of SVP. 2007. p.  
1597 44A.
- 1598 129. Chinzorig T, Kobayashi Y, Tsogtbaatar K, Currie PJ, Takasaki R, Tanaka T, et al.  
1599 Ornithomimosaur from the Nemegt Formation of Mongolia: manus morphological  
1600 variation and diversity. *Palaeogeogr Palaeoclimatol Palaeoecol.* 2018;494: 91–100.  
1601 doi:10.1016/j.palaeo.2017.10.031
- 1602 130. Kobayashi Y, Barsbold R. Ornithomimids from the Nemegt Formation of Mongolia. *J*  
1603 *Paleontol Soc Korea.* 2006;22: 195–207.
- 1604 131. Barsbold R. A new Late Cretaceous ornithomimid from the Mongolian People’s Republic.  
1605 *Paleontol J.* 1988;1: 124–127.
- 1606 132. Zanno LE, Makovicky PJ. On the earliest record of Cretaceous tyrannosauroids in western  
1607 North America: implications for an Early Cretaceous Laurasian interchange event. *Hist*  
1608 *Biol.* 2011;23: 317–325. doi:10.1080/08912963.2010.543952
- 1609 133. Currie P, Funston G, Osmolska H. New specimens of the crested theropod dinosaur  
1610 *Elmisaurus rarus* from Mongolia. *Acta Palaeontol Pol.* 2015. doi:10.4202/app.00130.2014
- 1611 134. Zanno LE, Makovicky PJ. Neovenatorid theropods are apex predators in the Late  
1612 Cretaceous of North America. *Nat Commun.* 2013;4: 2827. doi:10.1038/ncomms3827
- 1613 135. Sereno PC, Tan L, Brusatte SL, Kriegstein HJ, Zhao X, Cloward K. Tyrannosaurid Skeletal  
1614 Design First Evolved at Small Body Size. *Science* (80- ). 2009;326: 418–422.  
1615 doi:10.1126/science.1177428
- 1616 136. Choiniere JN, Clark JM, Forster CA, Xu X. A basal coelurosaur (Dinosauria: Theropoda)  
1617 from the Late Jurassic (Oxfordian) of the Shishugou Formation in Wucuiwan, People’s  
1618 Republic of China. *J Vertebr Paleontol.* 2010;30: 1773–1796.  
1619 doi:10.1080/02724634.2010.520779
- 1620 137. Zanno LE, Loewen MA, Farke AA, Kim G-S, Claessens LPAM, McGarrity CT. Late  
1621 Cretaceous theropod dinosaurs of southern Utah. In: Titus AL, Loewen MA, editors. *At*  
1622 *The Top of the Grand Staircase: The Late Cretaceous of Southern Utah.* Indiana University  
1623 Press, Bloomington, Indiana; 2013. pp. 504–525.

1624

## 1625 **Supporting information captions**

1626 **S1 Fig. Graphs of linear regression analysis of the Eutaw ornithomimosaur elements.**

1627 Femoral circumference versus (A1-A2), pedal phalanx IV-2 lengths, (B1-B2), metatarsal II

1628 lengths, and (C1-C2) tibial lengths. Note that the graphs of A1, B1, and C1 show when *D.*  
1629 *mirificus* is included in the analysis and A2, B2, and C2 show when *D. mirificus* is excluded from  
1630 the analysis.

1631

1632 **S2 Fig. Comparison of the astragali of theropod dinosaurs.** (A), *T. rex* (MOR 1125); (B), *D.*  
1633 *aquilunguis* (ANSP 9995); (C), *A. montgomeriensis* (RMM 6670); (D), *F. utahensis* (UMNH VP  
1634 12364); (E), *Anzu* sp. (NCSM 33801); (F), *T. sampsoni* (UMNH VP 19479); (G), *Q. henanensis*  
1635 (left, HGM 41HIII-0106); (H), *A. tugrikinensis* (MPC-D 100/130); (I), Bissekty taxon (ZIN PH  
1636 144/16). Abbreviations: alr, anterolateral ridge; ap, ascending process; asc, articular surface for  
1637 the calcaneum; asf, articular surface for the fibula; bap, base of the ascending process; cal,  
1638 calcaneum; fos, median fossa; hg, horizontal groove; icb, intercondylar bridge; jun, junction; lc,  
1639 lateral condyle; mc, medial condyle; n, notch; slf, laterally flared articular surface of the base;  
1640 sluf, laterally unflared articular surface of the base; Note that all astragali refer to left except for  
1641 the right side of *F. utahensis* and is reversed. Images are adapted and modified from (B), Brusatte  
1642 et al. [102]; (C), Carr et al. [11]; (F), Zanno et al. [57]; (G), Xu et al. [60]; (I), Sues and Averianov  
1643 [105].

1644

1645 **S3 Fig. Comparison of second metatarsals of tyrannosauroids.** (A), *A. montgomeriensis*  
1646 (RMM 6670); (B), *A. atokensis* (NCSM 14345); (C), *A. sarcophagus* (AMNH 5432); (D), *T. rex*  
1647 (FMNH PR 2081). Note that all images refer to the right metatarsals except for the left side of *A.*  
1648 *sarcophagus*. Images adapted and modified from (A), Carr et al. [11]; (C-D), Brochu [63]. Not to  
1649 scale.

1650

1651 **S4 Fig. Comparison of the distal halves of third metatarsals of ornithomimosauroids.** (A), *O.*

1652 *velox* (YPM 542); (B), *D. brevitertius* (UA 16182); (C), *R. evadens* (ROM 1790); (D), *A.*  
1653 *tugrikinensis* (MPC-D 100/130); (E), Large Gansu ornithomimid metatarsal (IVPP 12756); (F),  
1654 *Q. henanensis* (HGM 41HIII-0106); (G), *A. fridayi* (UAM 74-16); (H), *B. grandis* (FRDC-GS GJ  
1655 06). Abbreviations: acdn, distally mediolaterally not widened articular caput; acdw, distally  
1656 mediolaterally widened articular caput; Note that all images refer to left third metatarsals except  
1657 for the right side of large Gansu ornithomimid and *Arkansaurus fridayi*. Images are adapted and  
1658 modified from (C), McFeeters et al. [74]; (E), Shapiro et al. [65]; (F), Xu et al. [60]; (G), Hunt  
1659 and Quinn [14]; (H), Makovicky et al. [70]. Not to scale.

1660

1661 **S5 Fig. Comparison of the distal halves of third metatarsals of theropod dinosaurs. (A), *C.***

1662 *pergracilis* (= *M. canadensis*), (CMN 8538); (B), *E. rarus* (MPC-D 102/6); (C), *A.*

1663 *montgomeriensis* (RMM 6670); (D), *T. sampsoni* (UMNH VP 19479); (E), *S. inequalis* (= *L.*

1664 *mcmasterae*) (TMP 1992.036.0575). Abbreviations: elp, extensor ligament pit; ics, intercondylar

1665 sulcus; lc, lateral condyle; lt, “lateral tab,”; mc, medial condyle. Note that all images refer to the

1666 right metatarsals except for the left metatarsal of *T. sampsoni*. Images adapted and modified from

1667 (B), Currie et al. [133]; (C), Carr et al. [11]; (D), Zanno et al. [57]; (E), van der Reest and Currie

1668 [89]. Image of the left metatarsus of *T. sampsoni* is mirrored. Not to scale.

1669

1670 **S6 Fig. Comparison of first pedal phalanges of third digit of selected theropod dinosaurs.**

1671 (A), *C. pergracilis* (= *M. canadensis*) (CMN 8538); (B), *A. wyliei* (CMN 78000); (C), juvenile *T.*

1672 *bataar* (MPC-D 107/7); (D), *G. libratus* (FMNH PR 2211); (E), *Alectrosaurus* sp. (MPC-D

1673 100/51); (F), *A. sarcophagus* (CMN 11315); (G), *T. sampsoni* (UMNH VP-19479); (H), *F.*

1674 *utahensis* (); (I), *G. erlianensis* (LH V0011); (J), *A. atokensis* (NCSM 14345); (K), *A. fragilis*

1675 (YPM 1930); (L), *T. rex* (FMNH PR 2081). Abbreviations: elp, extensor ligament pit. Note that

1676 A, D, F, J, and L are referred to the right and B, C, E, G-I, and K are referred to the left pedal  
1677 phalanges. Images adapted and modified from (G), Zanno et al. [57]; (H), Zanno [59]; (K),  
1678 Madsen [94], and A and L are mirrored. Not to scale.

1679

1680 **S7 Fig. The preserved vertebrae of the Eutaw ornithomimosaur.** (A), the anterior dorsal  
1681 (MMNS VP-6120); (B), the posterior dorsal (MMNS VP-113); (C), the posterior caudal centra.  
1682 (A1-C1), left lateral; (A2-C2), right lateral; (A3-C3), dorsal; (A4-C4), ventral; (A5-C5), anterior;  
1683 and (A6-C6), posterior views. Abbreviations: am, angled margin of the articular surface; ar,  
1684 angular ridge; dep, depression; gr, groove; lr, longitudinal groove; na, neural arch; nc, neural  
1685 canal; ncs, neurocentral suture; ns, neural spine; poz, postzygapophysis; prz, prezygapophysis; vk,  
1686 ventral keel. Scale bars equal to 3 cm for A<sub>1</sub>-A<sub>4</sub> – C<sub>1</sub>-C<sub>4</sub> and 2 cm for A<sub>5</sub>-A<sub>6</sub> – C<sub>5</sub>-C<sub>6</sub>.

1687

1688 **S8 Fig. Comparison of the anterior (A) and the posterior (B) dorsal vertebrae of selected**  
1689 **theropod dinosaurs.** A1, C1-D1, the fourth and A2, C2-D2, the eleventh dorsal vertebrae; (A1-  
1690 A2), *D. antirrhopus* in left lateral views; (B), *S. meekerorum* in right (B1) and left (B2) lateral  
1691 views; (C1-C2), *A. riocoloradense* in left lateral views; (D1-D2), *T. rex* (FMNH PR2081) in right  
1692 (D1) and left (D2) lateral views. Abbreviations: ncs, neurocentral suture; pa, parapophysis; pl,  
1693 pleurocoel; pnf, pneumatic fossa. Images (A1-A2) and (C1) are reversed. Images adapted and  
1694 modified from (A1-A2), Ostrom [111]; (B1-B2), Zanno and Makovicky [134]; (C1-C2), Sereno et  
1695 al. [135]; (D1-D2), Brochu [63]. Not to scale.

1696

1697 **S9 Fig. Comparison of the posterior caudal vertebrae of selected theropod dinosaurs.** (A), *D.*  
1698 *aquilunguis*; (B), *A. montgomeriensis*; (C), *M. roseae*; (D), *Z. salleeii*; (E), *T. rex*; (F), *G. libratus*;  
1699 (G), *T. euotica*; (H), Utah tyrannosaurid. Abbreviations: na, neural arch; ns, neural spine; poz,

1700 postzygapophysis; prz, prezygapophysis. Images adapted and modified from (A), Brusatte et al.  
1701 [102]; (B), Carr et al. [11]; (C), Coria and Currie, [103]; (D), Choiniere et al. [136]; (E), Brochu  
1702 [63]; (F), Lambe [87]; (G), Brusatte et al. [72]; (H), Loewen et al. [137]. Not to scale.

1703

1704 **S10 Fig. Manual phalanges of the Eutaw ornithomimosaur.** (A), the right first phalanx of  
1705 digit 3 (PhIII-1); (B), the ungual phalanx (I-1?). (A1, B3), anterior; (A2, B4), posterior; (A3, B1),  
1706 lateral; (A4, B2), medial; (A5, B5), proximal; and (A6), distal views. Abbreviations: clf, collateral  
1707 ligament fossa; conc, concavity; dep, depression; elp, extensor ligament pit; ft, flexor tubercle;  
1708 glm, ginglymoid articular surface; ics, intercondylar sulcus; lc, lateral condyle; lgr, lateral groove;  
1709 mc, medial condyle; mr, medial ridge; p, process; t, tubercle.

1710

1711 **S11 Fig. Partial tibia of the medium-bodied Eutaw ornithomimosaur.** (A), anterior; (B),  
1712 posterior; (C), lateral; (D), medial; (E), proximal; (F), distal views. Interpretive illustration of *Q.*  
1713 *henanensis* (HGM 41HIII-0106) shows the approximate location of the preserved portion of the  
1714 midshaft. Abbreviations: a, anterior; bcc, a base of the cnemial crest; cfb, contact surface for the  
1715 fibula; fc, fibular crest; l, lateral; m, medial; p, posterior.

1716

1717 **S12 Fig. Comparison of the tibiae of selected theropod dinosaurs.** (A), *G. bullatus* (MPC-D  
1718 100/11); (B), *Q. henanensis* (HGM 41HIII-0106); (C), *B. grandis* (FRDC-GS GJ 06); (D), *F.*  
1719 *utahensis* (UMNH VP 12362); (E), *M. intrepidus* (NCSM 33392); (F), *D. aquilunguis* (ANSP  
1720 9995); (G), *A. montgomeriensis* (RMM 6670); (H), *T. rex* (FMNH PR 2081). Abbreviations: agr,  
1721 a groove of the articular facet for the fibula; fc, fibular crest; nf, nutrient foramen. A, B, D, F, and  
1722 H are referred to left and C, E, and G are referred to the right tibiae. Images adapted and modified  
1723 from (A), Osmólska et al. [64]; (B), Xu et al. [60]; (C), Makovicky et al. [70]; (D), Zanno [59];



1724 (E), Zanno et al. [86]; (F), Brusatte et al. [102]; (G), Carr et al. [11]; (H), Brochu [63]. All images  
1725 are seen from lateral view except for (A) and (G), which are in posterior view. Not to scale.

1726

1727

1728 **S1 Table. Measurement comparisons of the select pedal elements of ornithomimosaur.** Note

1729 that a single asterisk (\*) indicates the measurements including *Deinocheirus mirificus*, and a

1730 double asterisk (\*\*) indicate the measurements excluding *Deinocheirus mirificus*.

1731

1732 **S2 Table. Body mass estimates for ornithomimosaur.** Note that a single asterisk (\*) indicates

1733 the values when *D. mirificus* is included, and double asterisk (\*\*) indicate the values when

1734 *Deinocheirus mirificus* is excluded in the analysis. Abbreviations: (cQE), the corrected

1735 quadrupedal values for biped; (DME), developmental mass extrapolation; (FC), femoral

1736 circumference.

1737



bioRxiv preprint doi: <https://doi.org/10.1101/2022.03.25.485782>; this version posted March 25, 2022. The copyright holder for this preprint (which was not certified by peer review) is the author/funder, who has granted bioRxiv a license to display the preprint in perpetuity. It is made available under aCC-BY 4.0 International license.

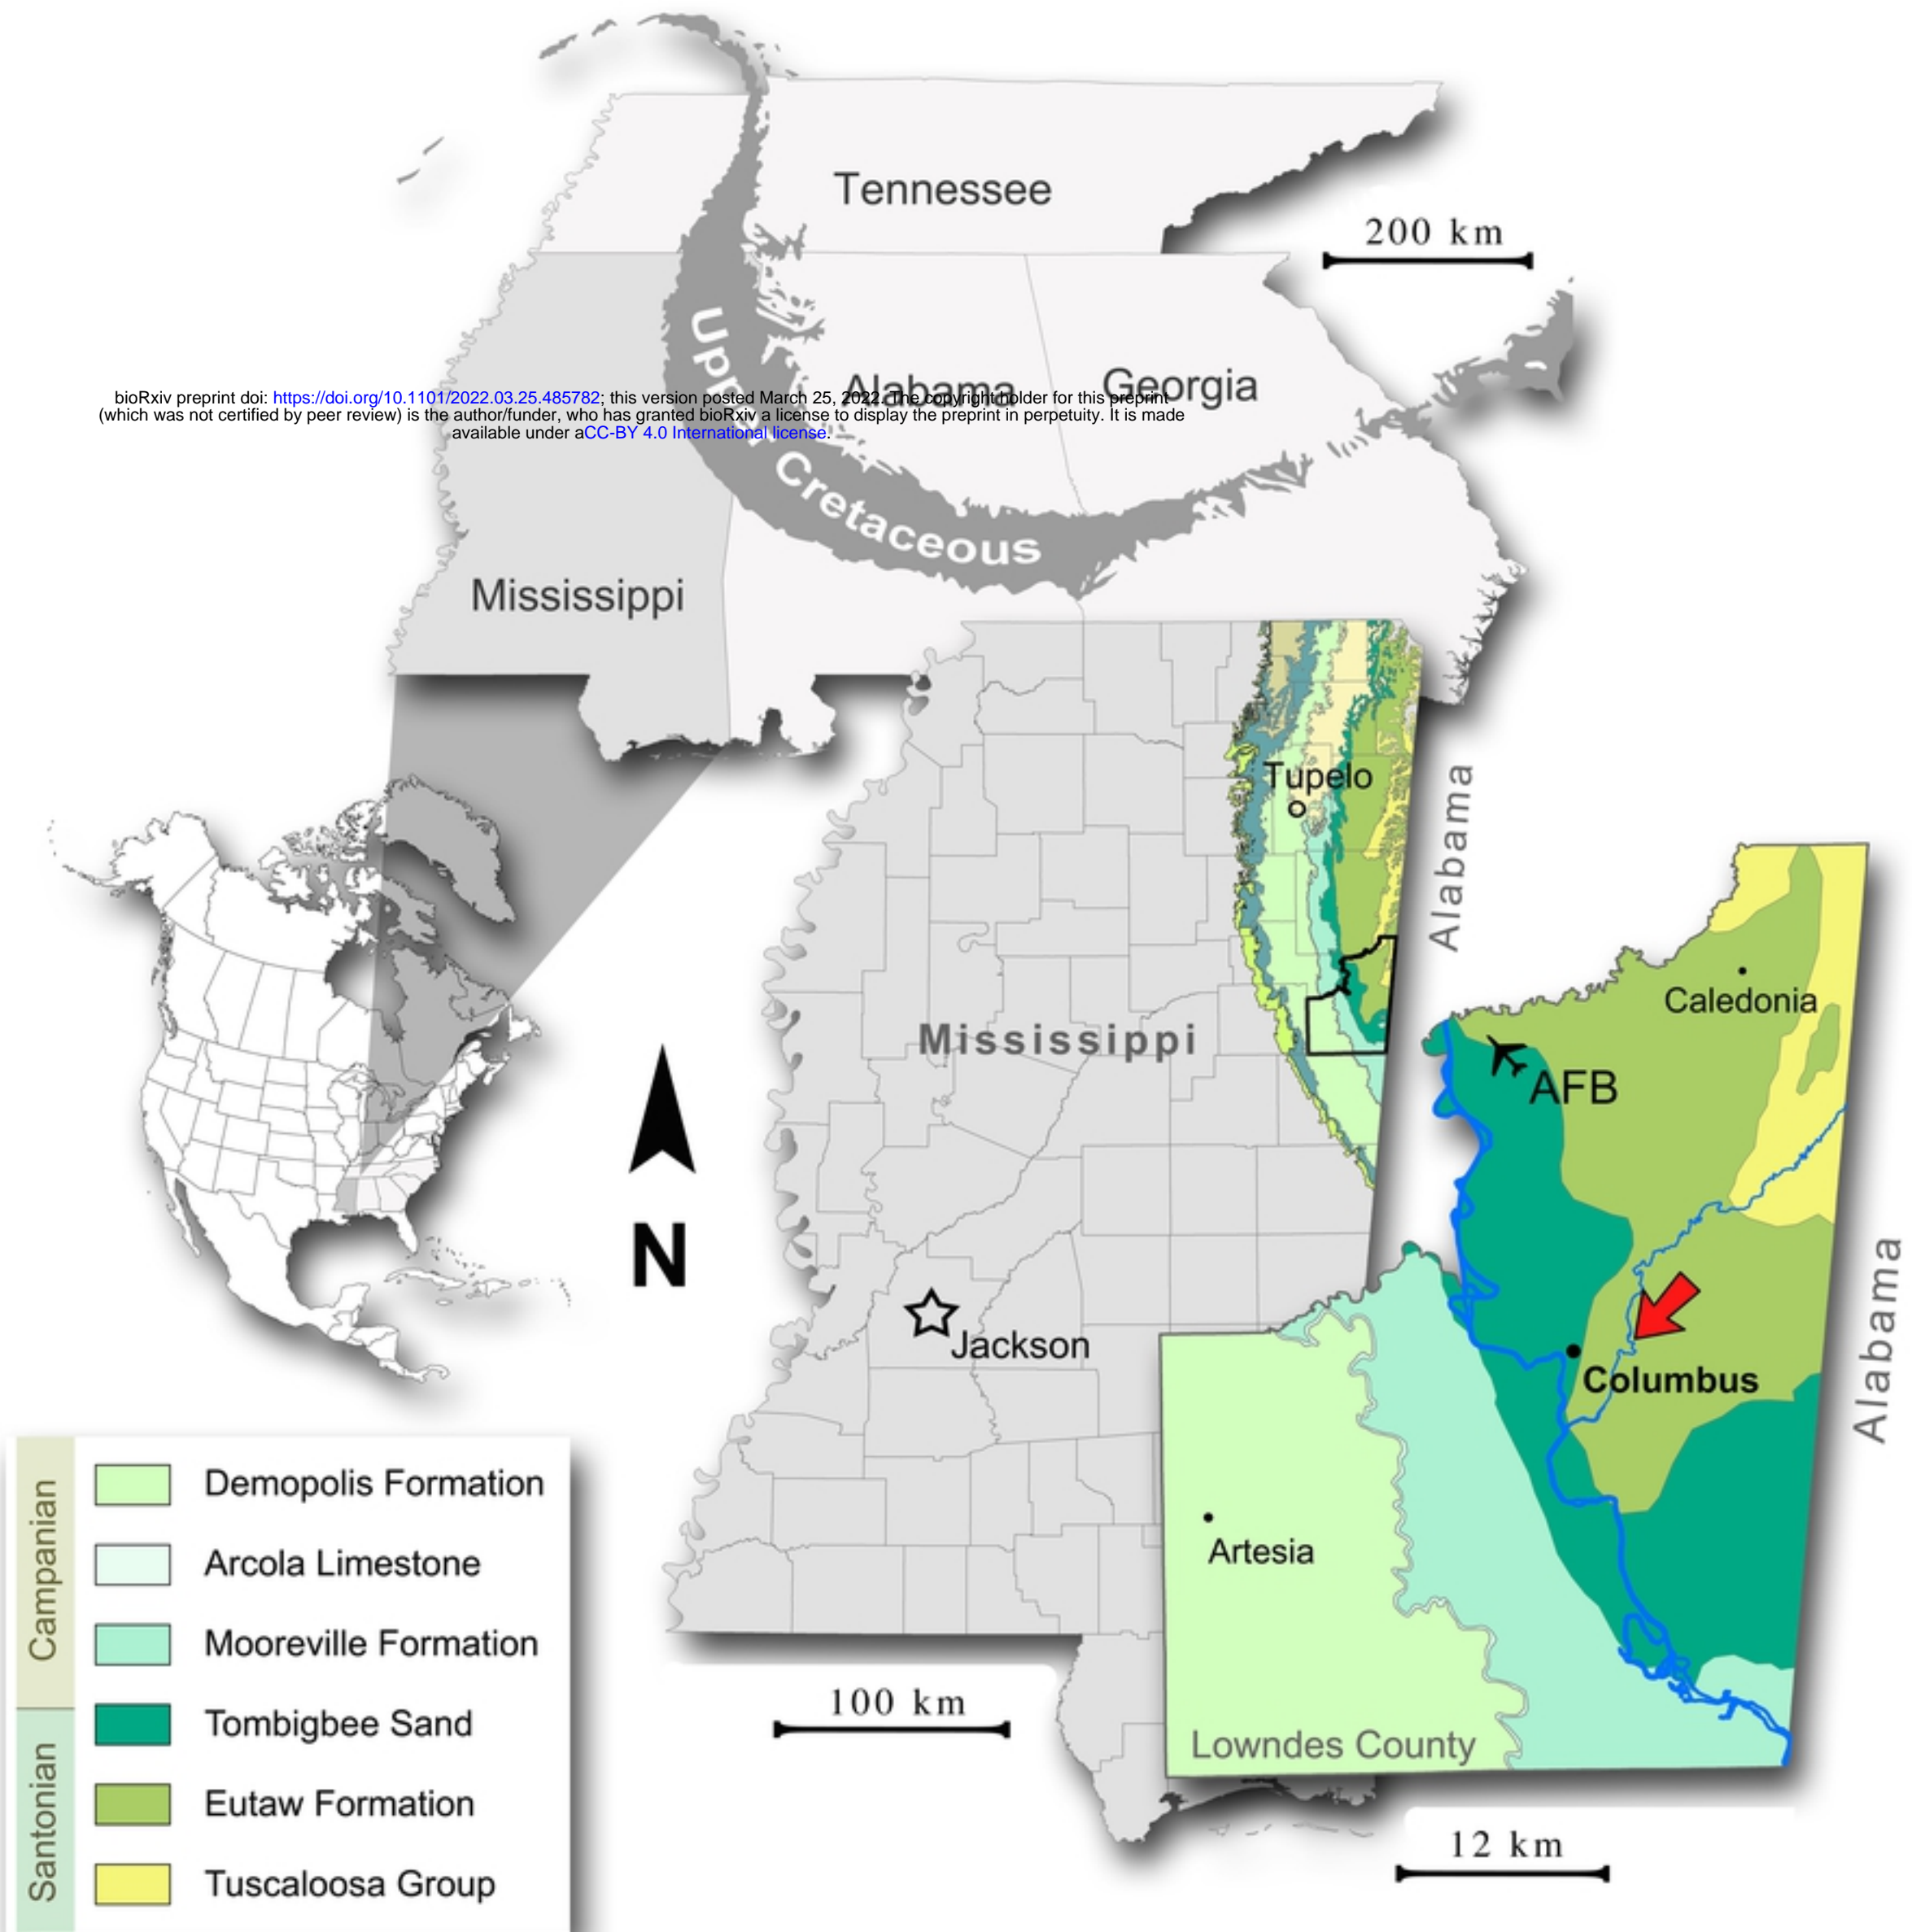

Figure 1

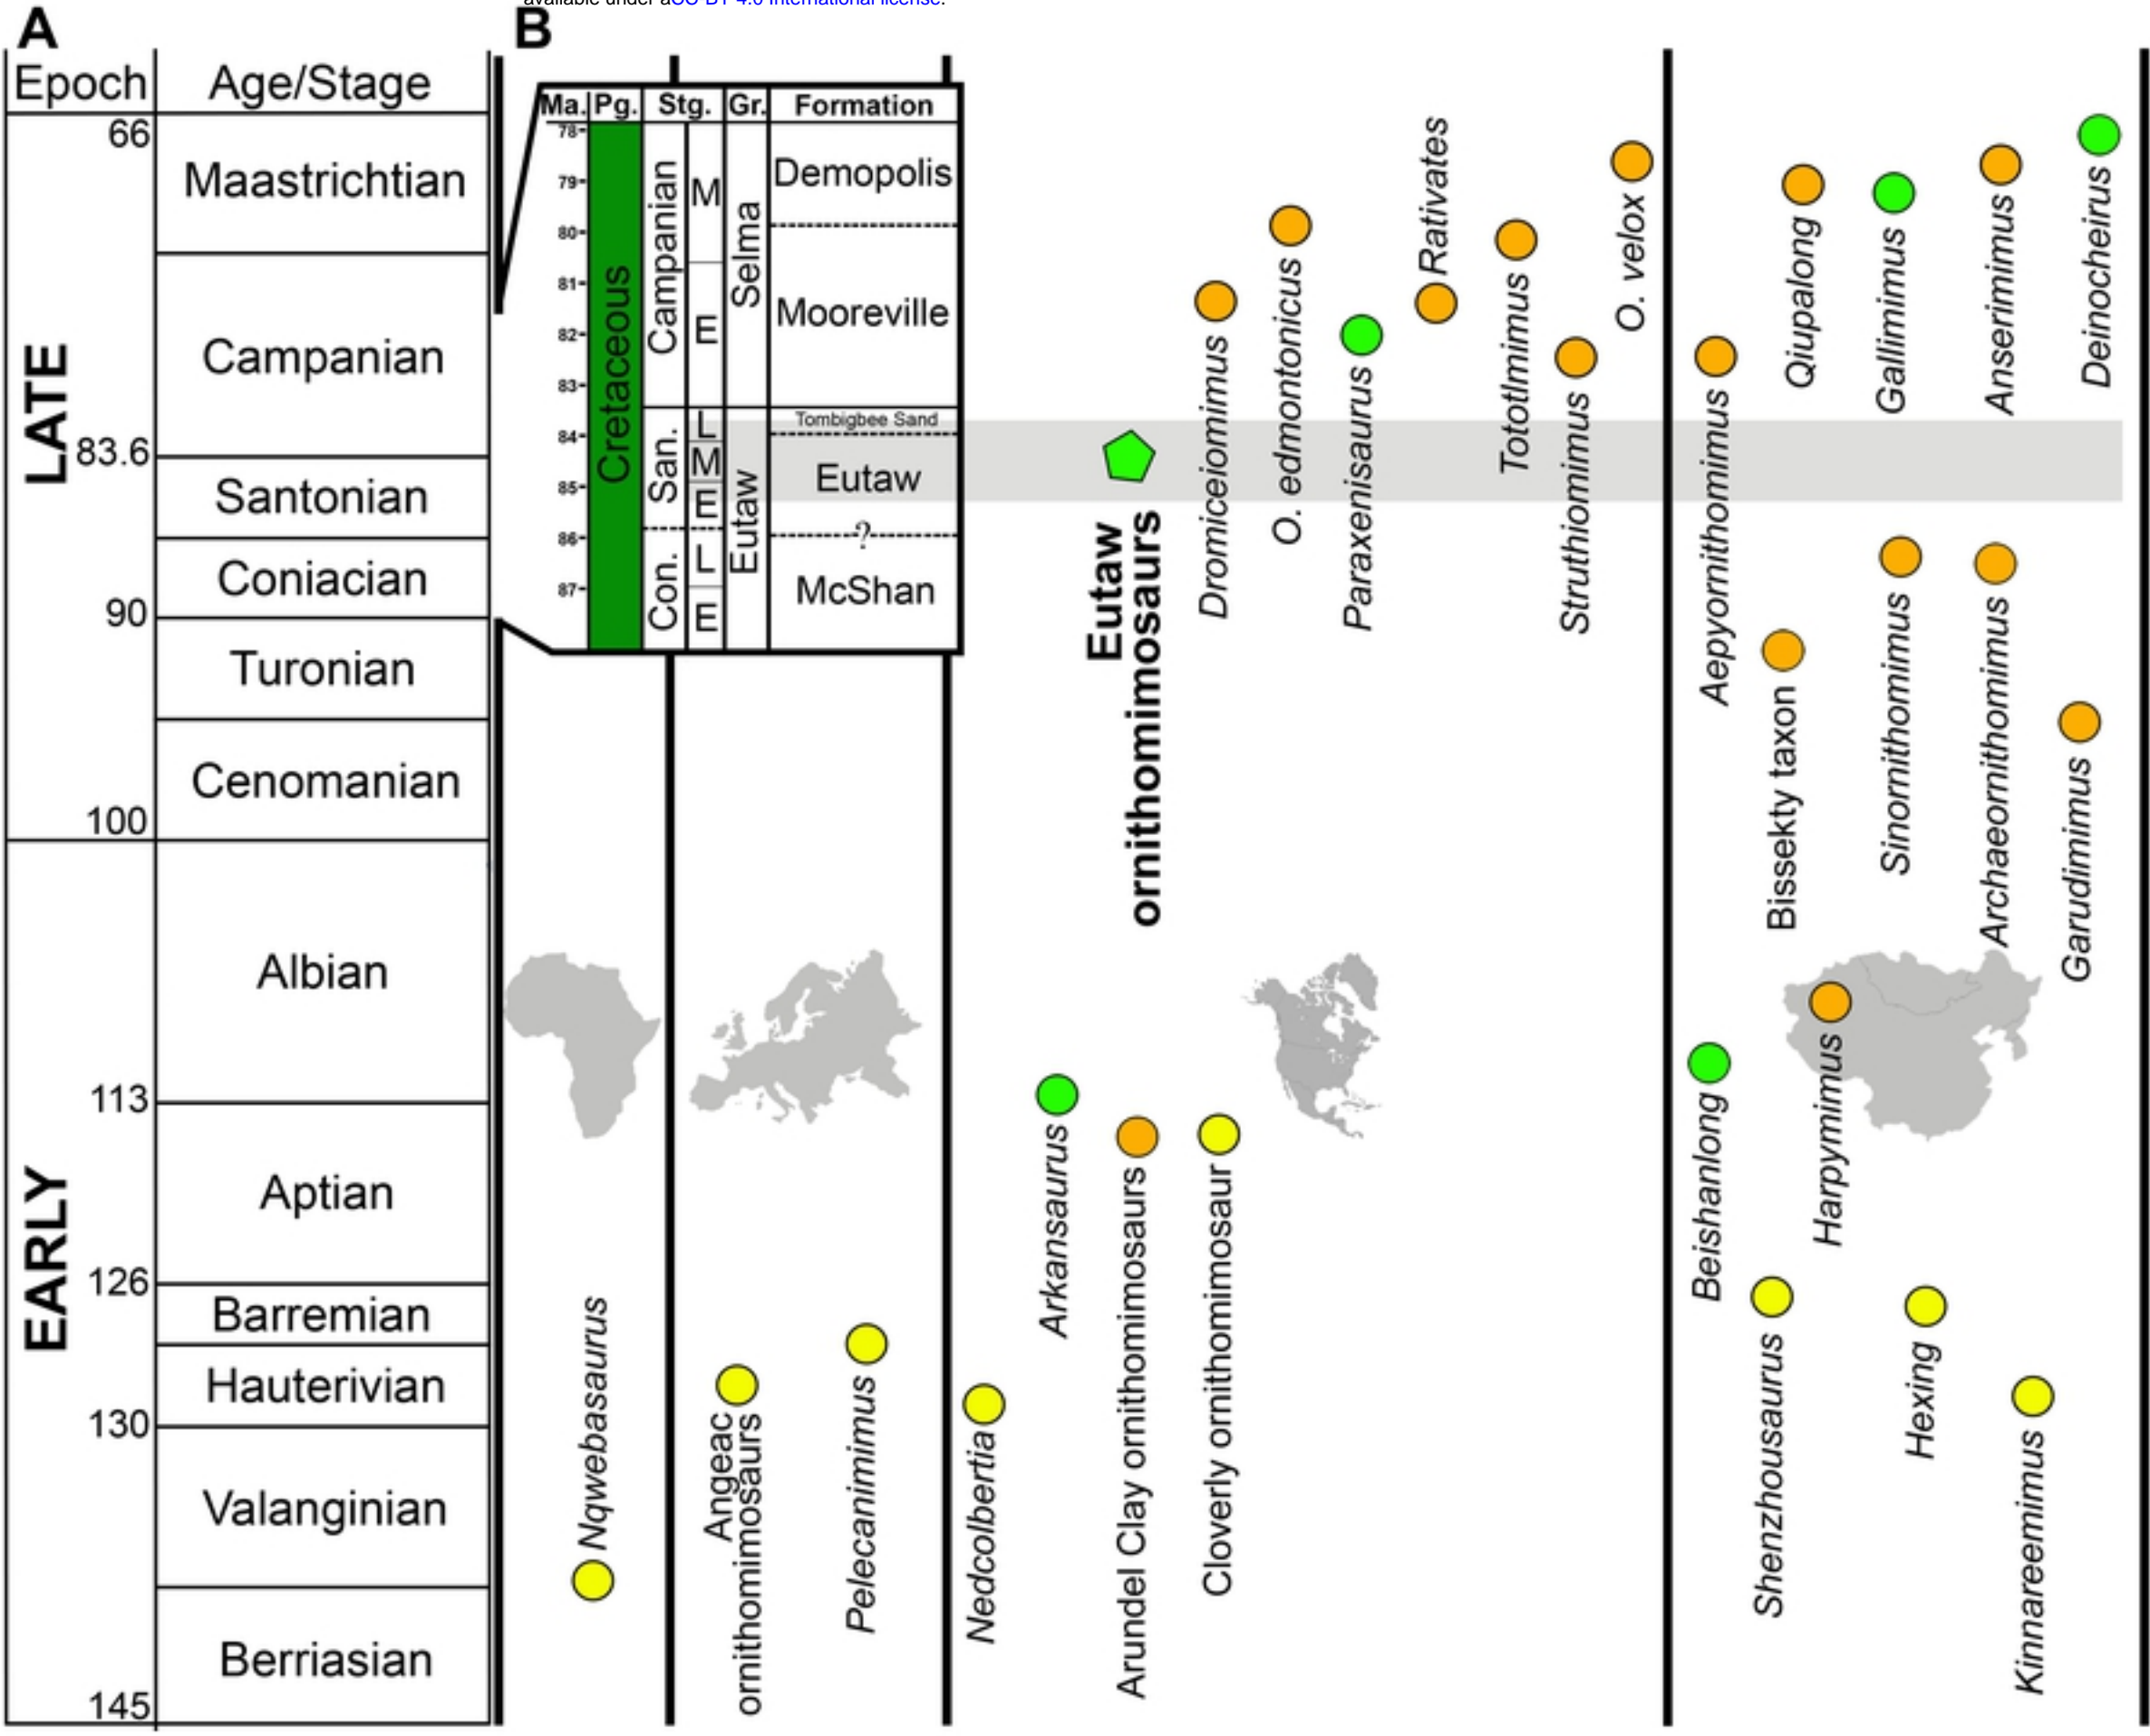

Figure 2



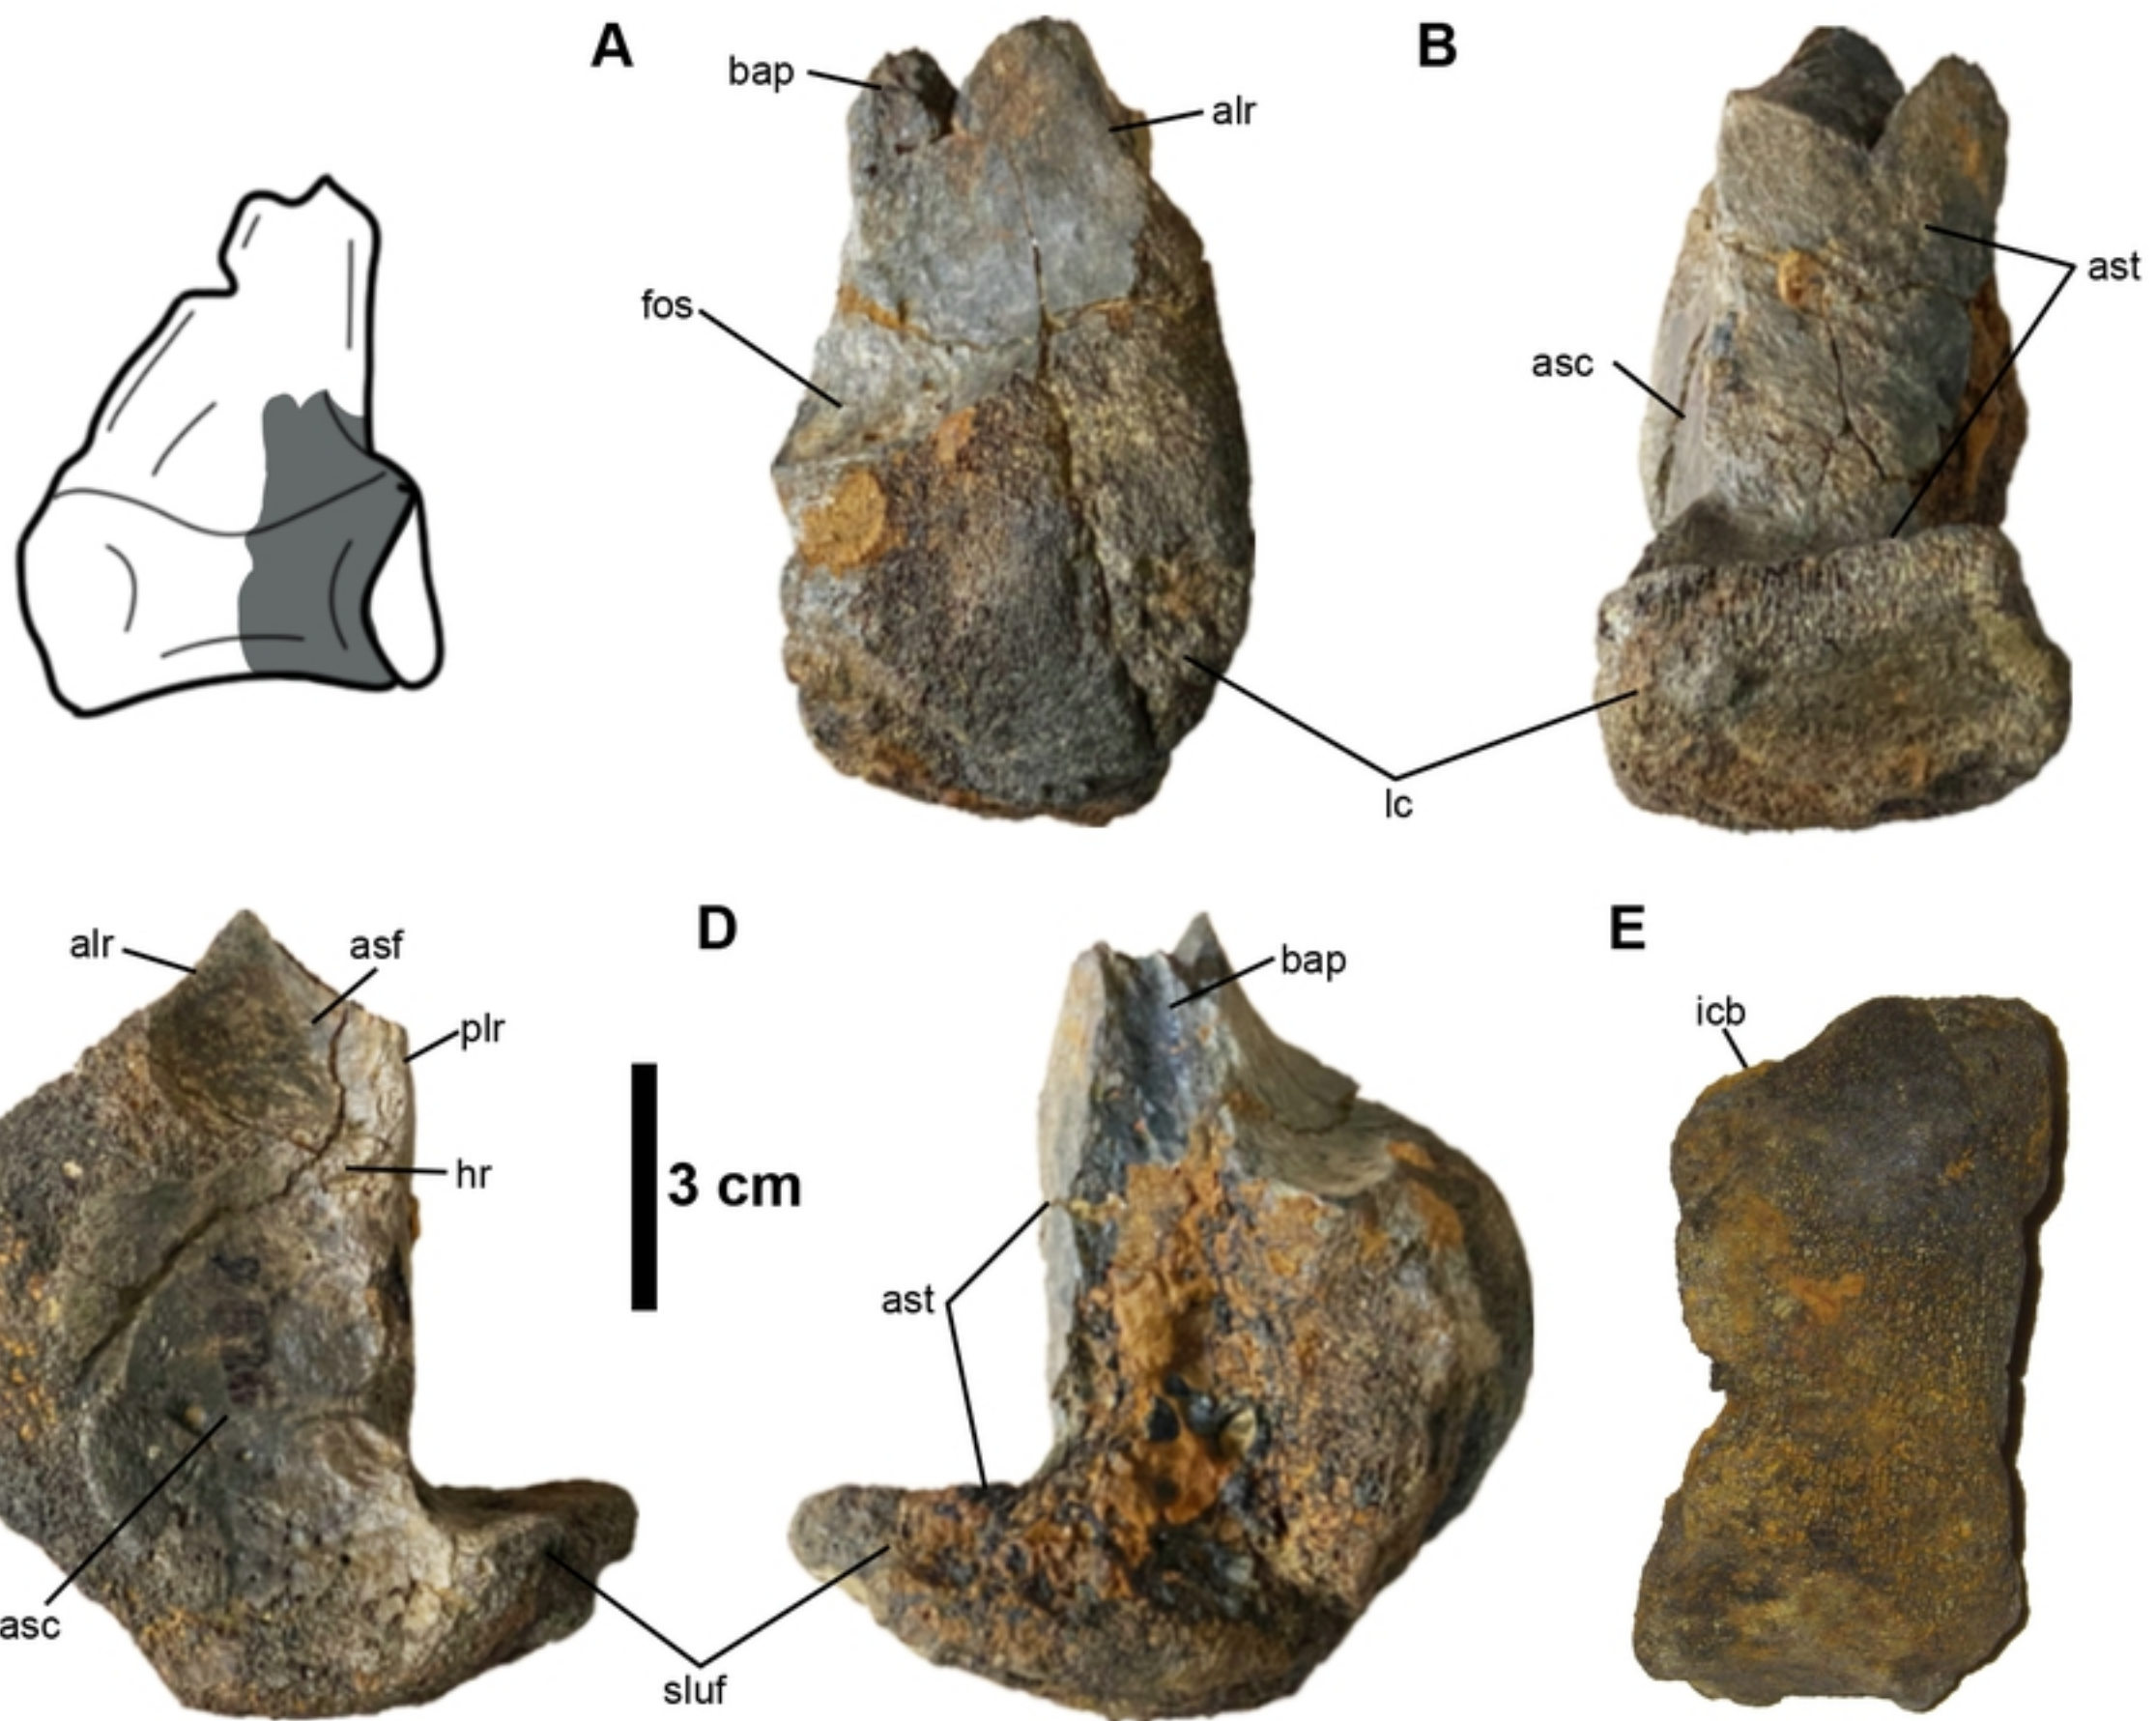

Figure 3



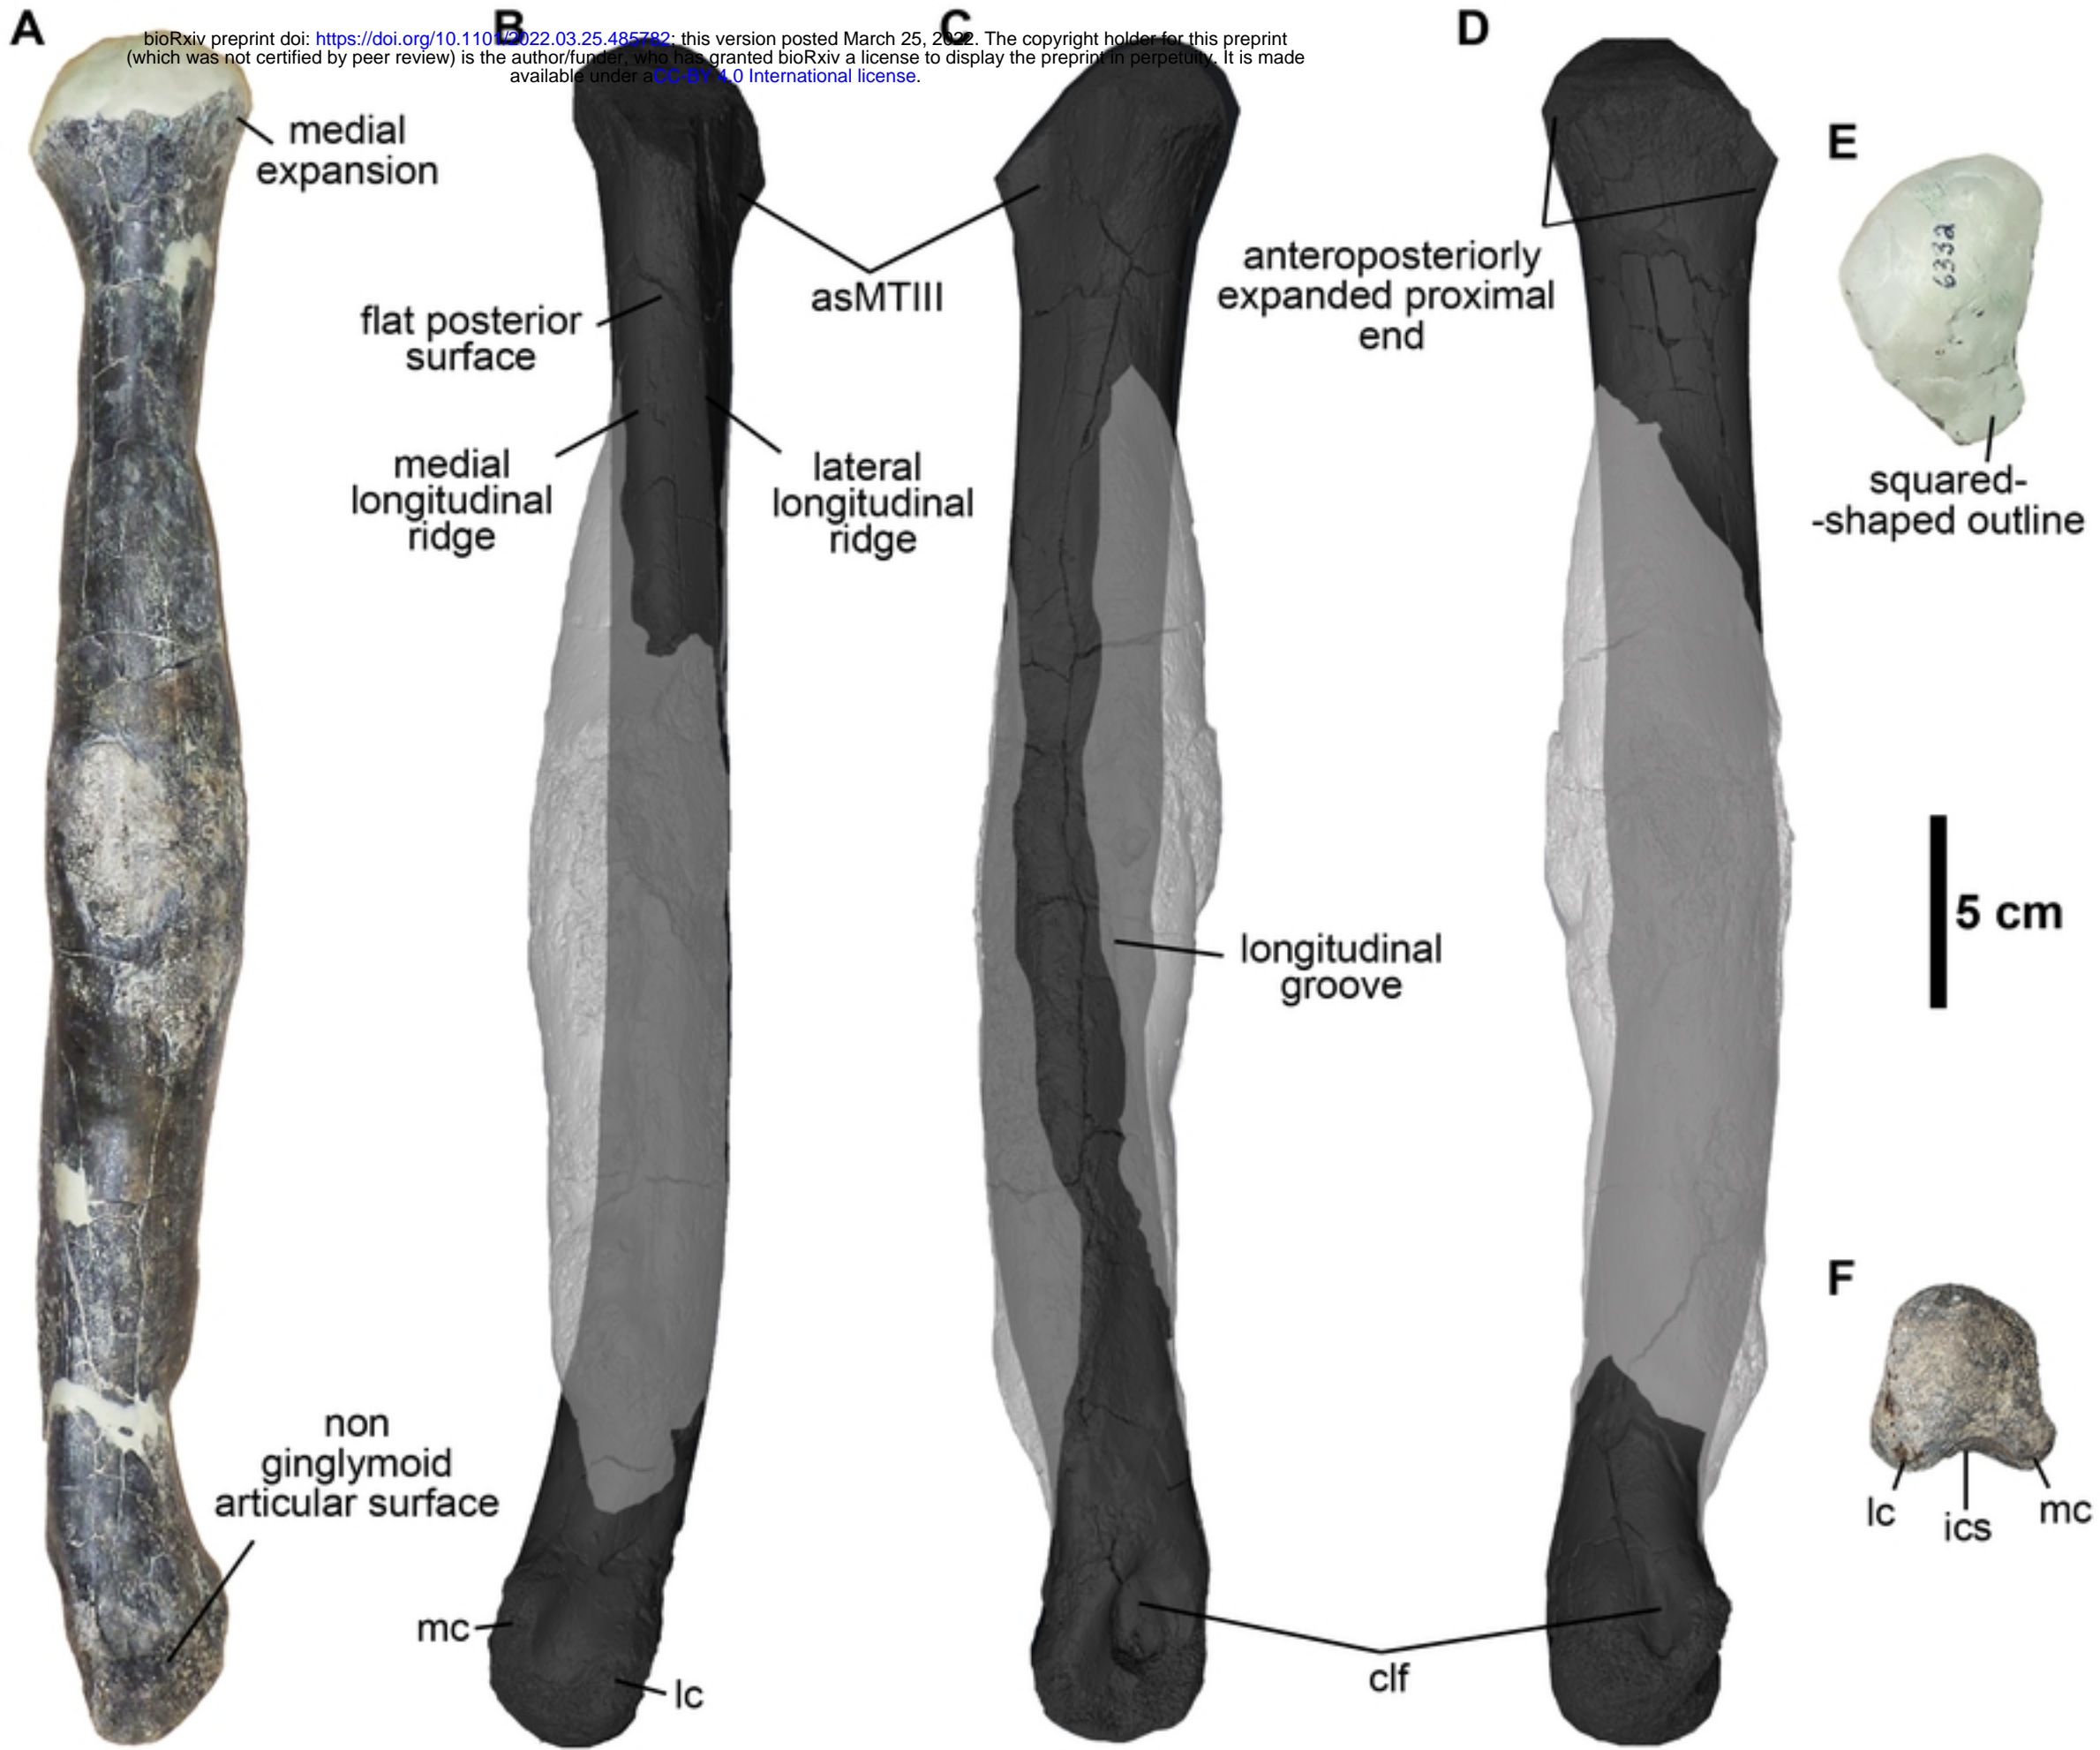

Figure 4

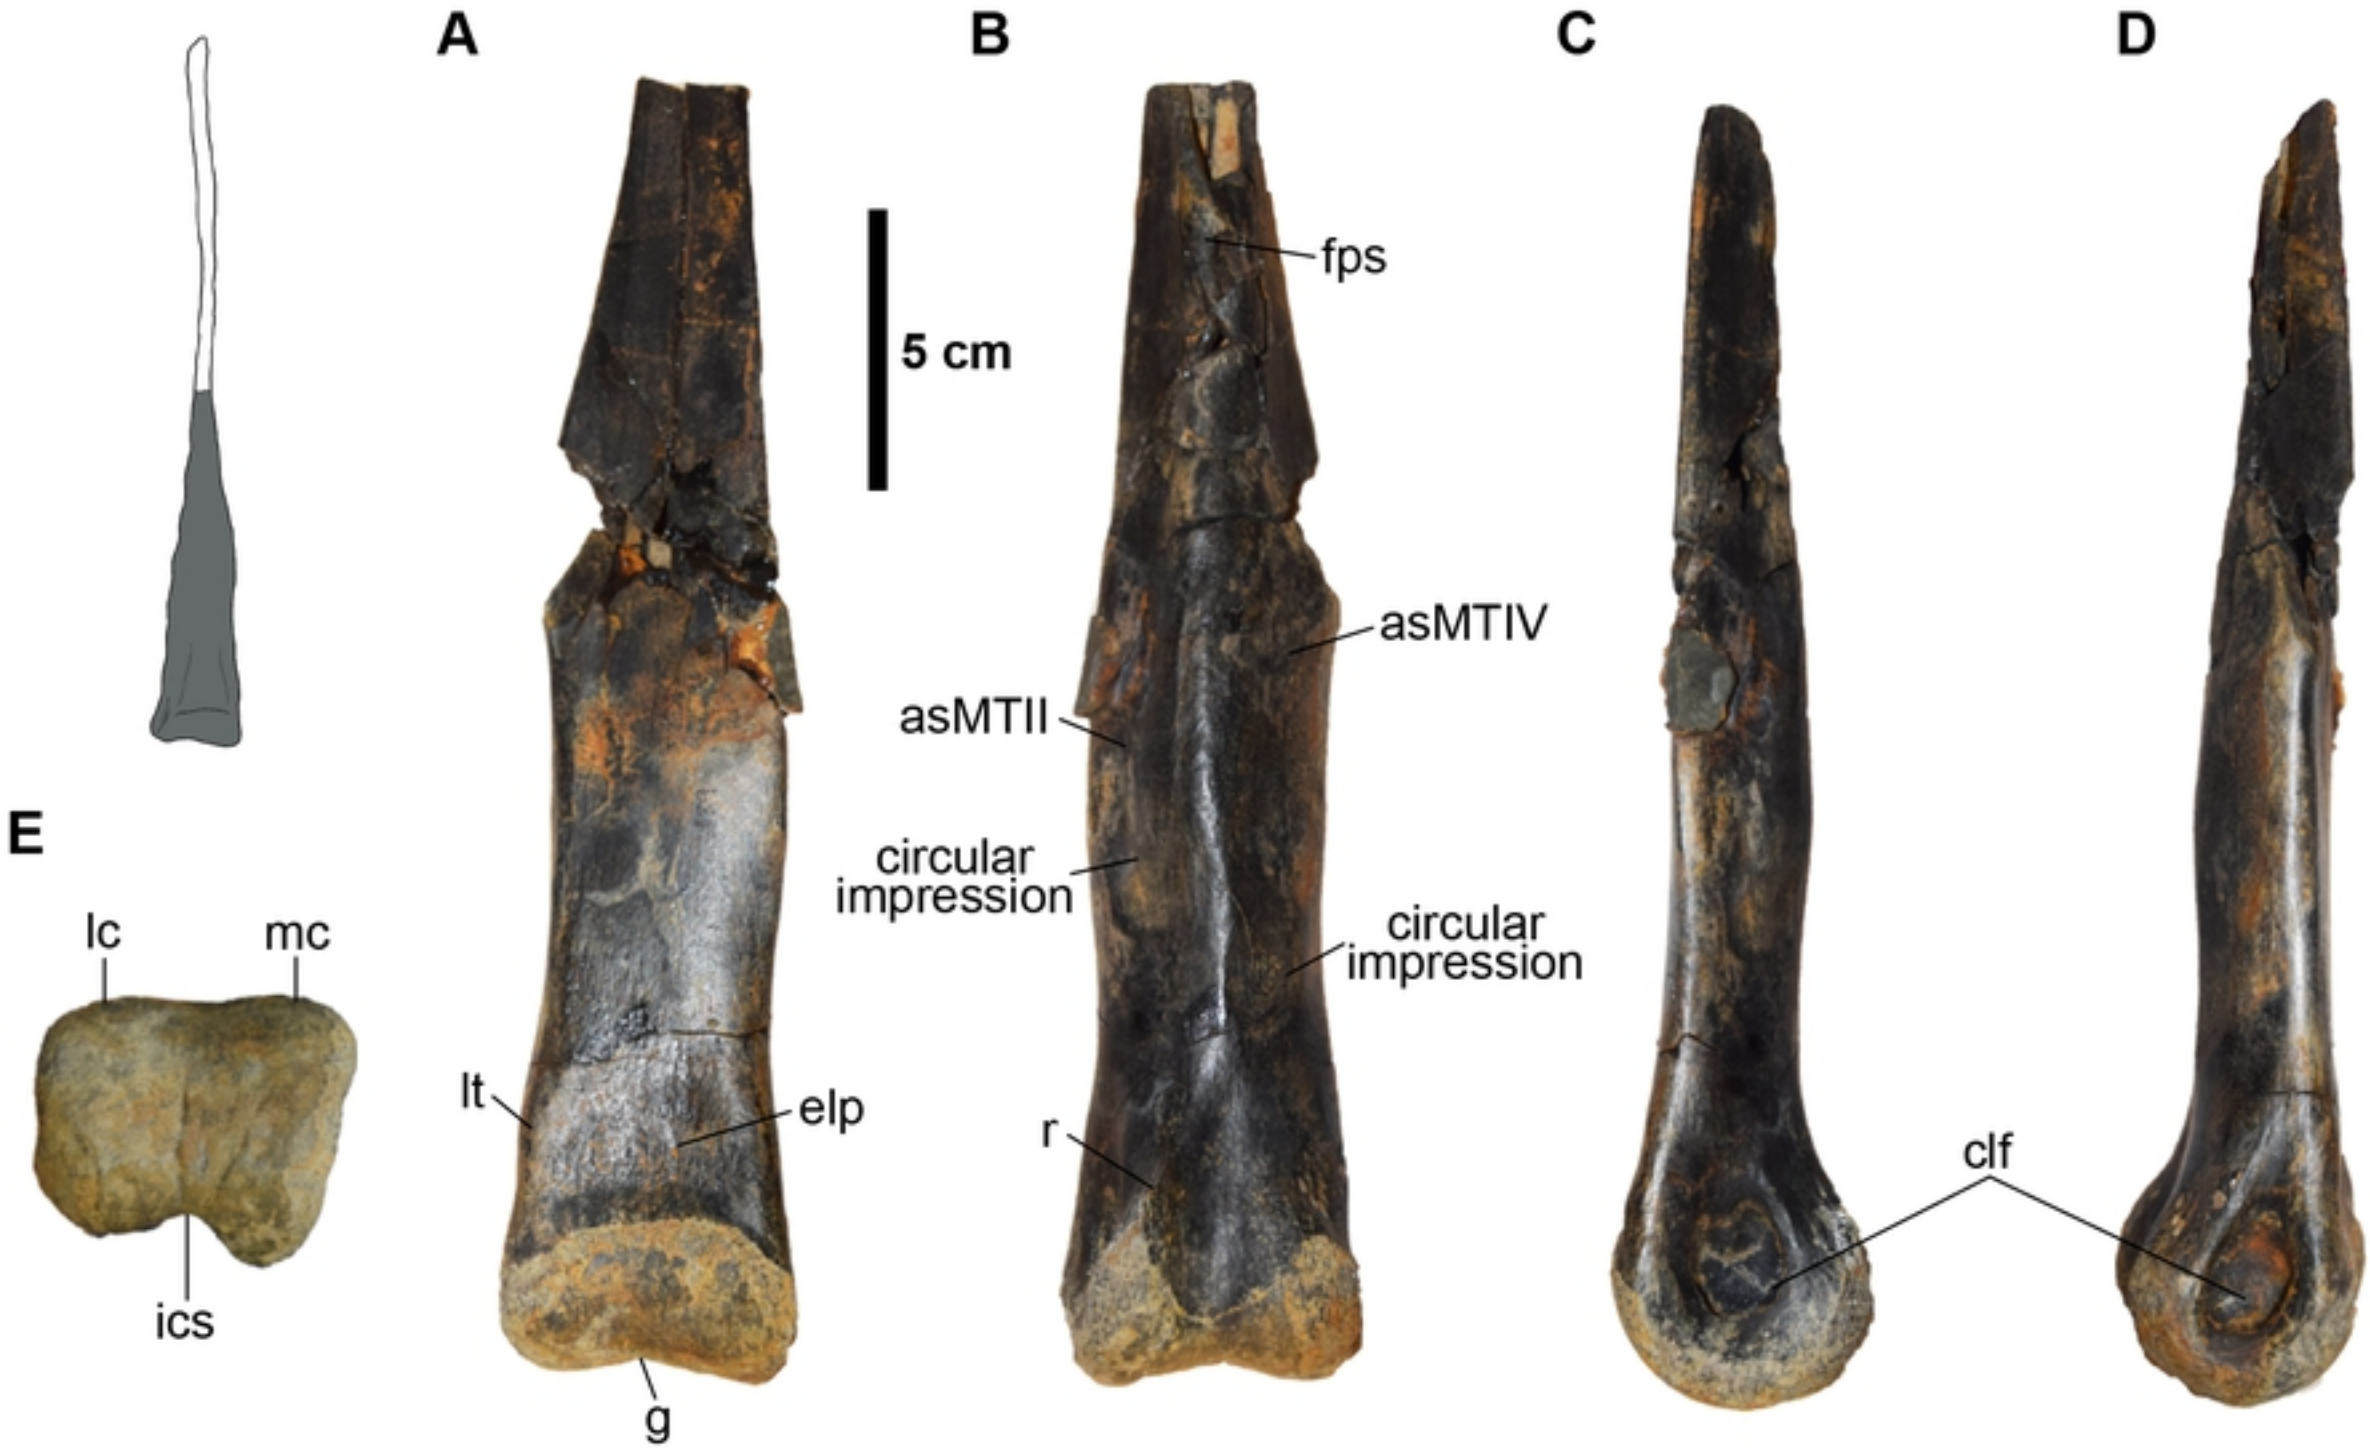

Figure 5



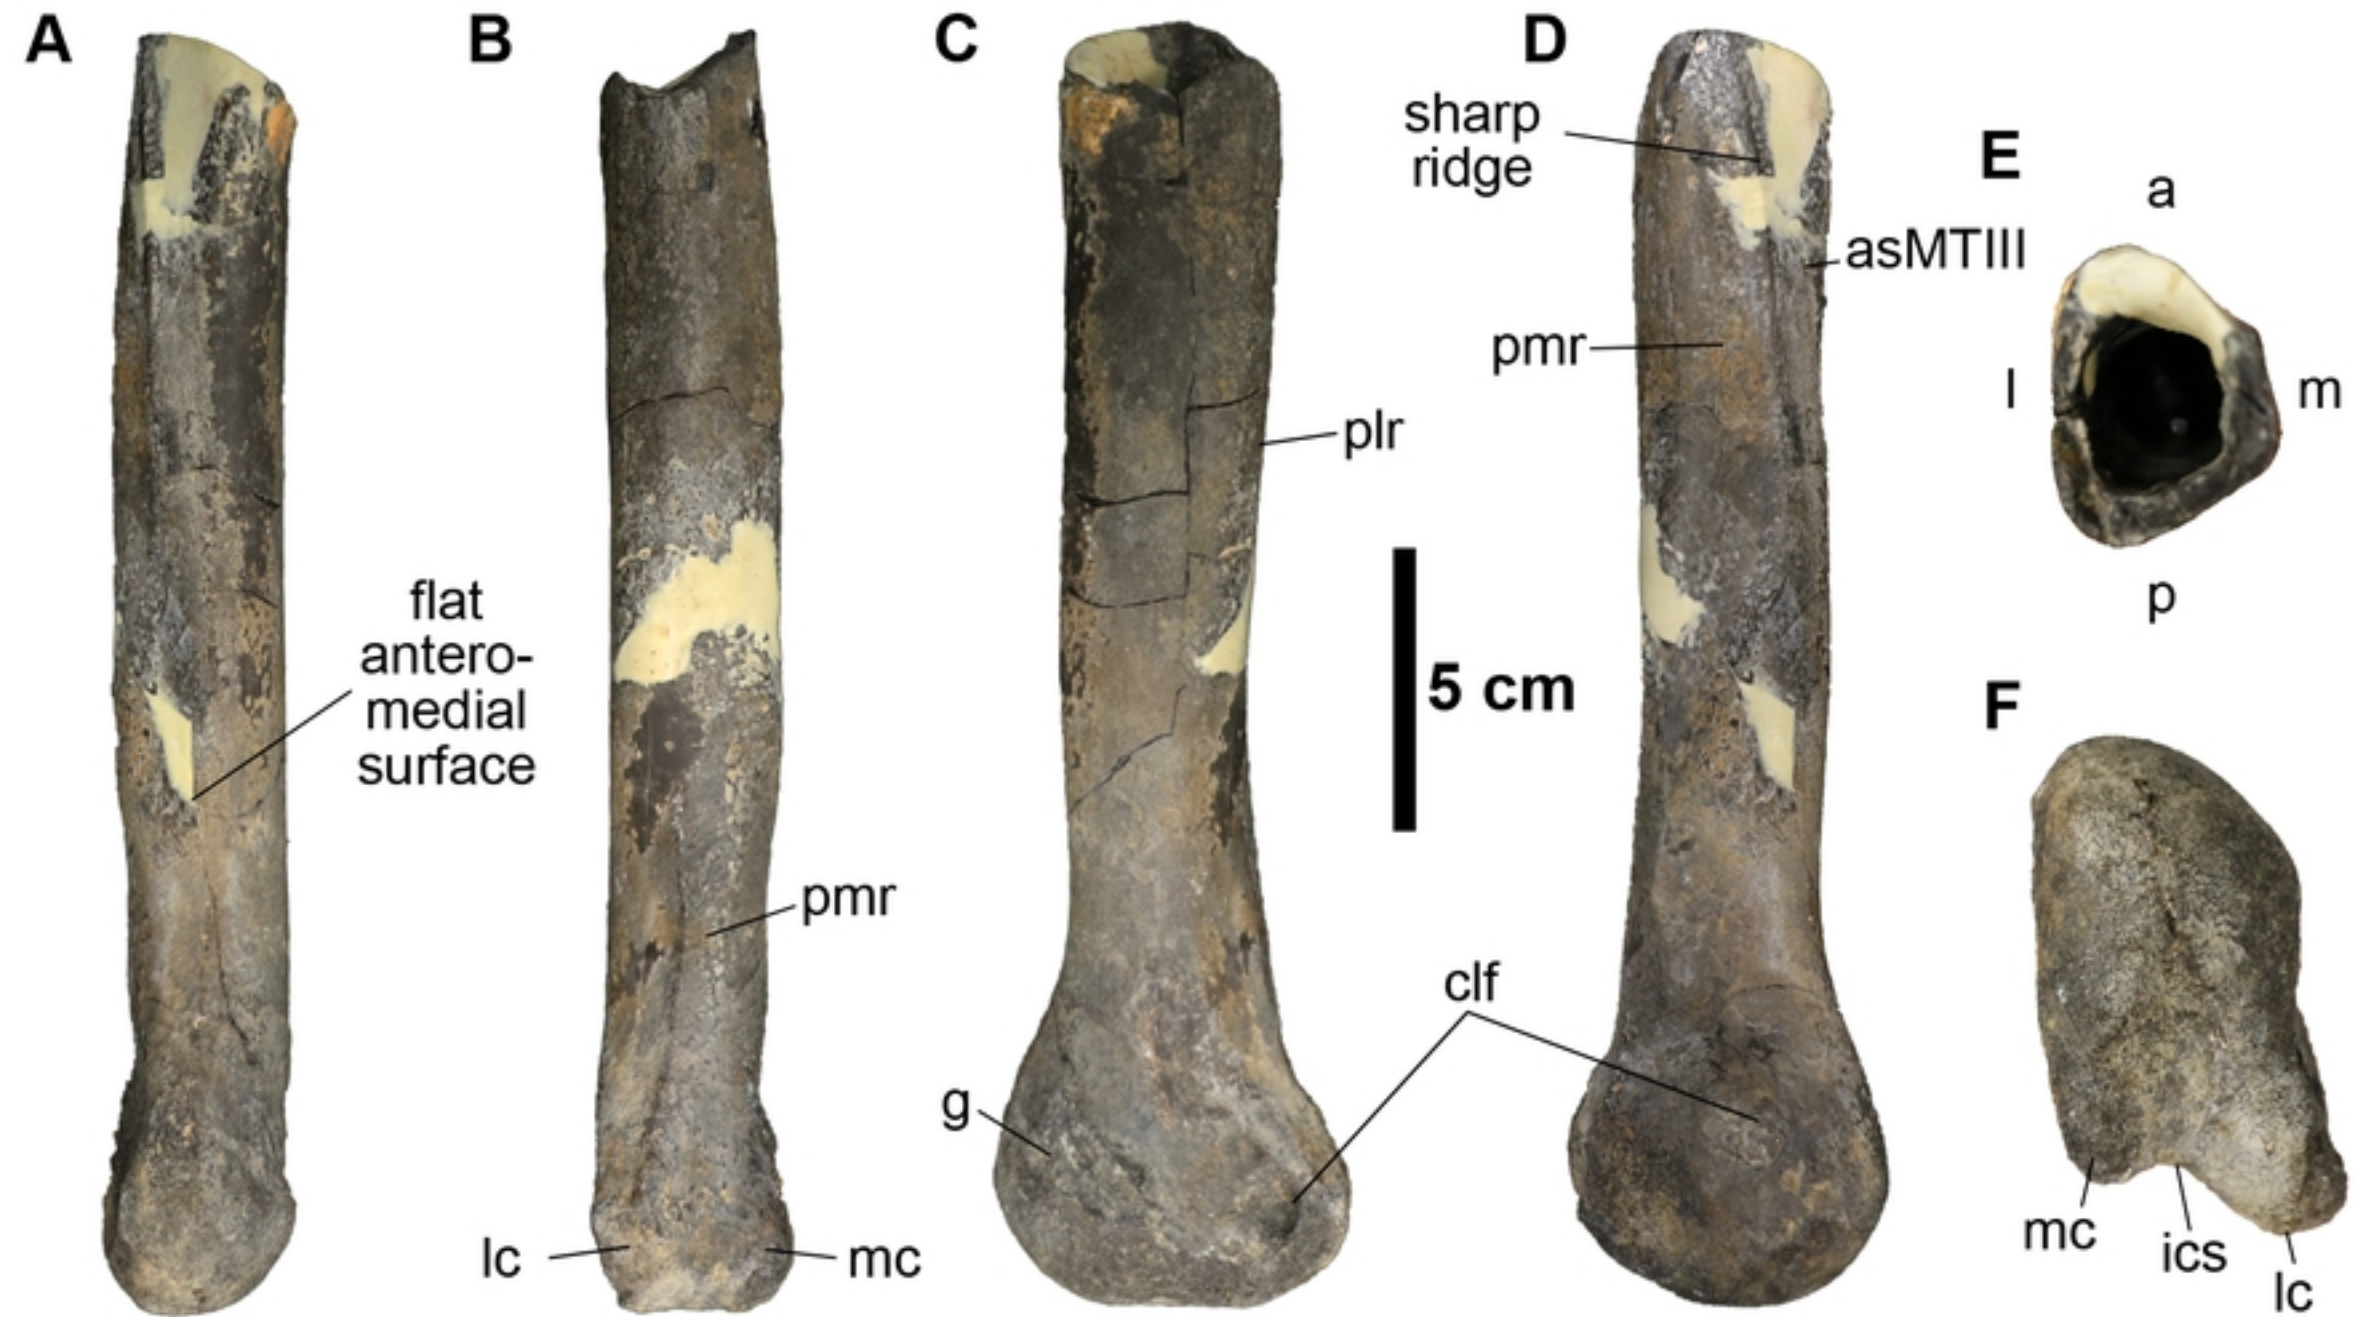

Figure 6



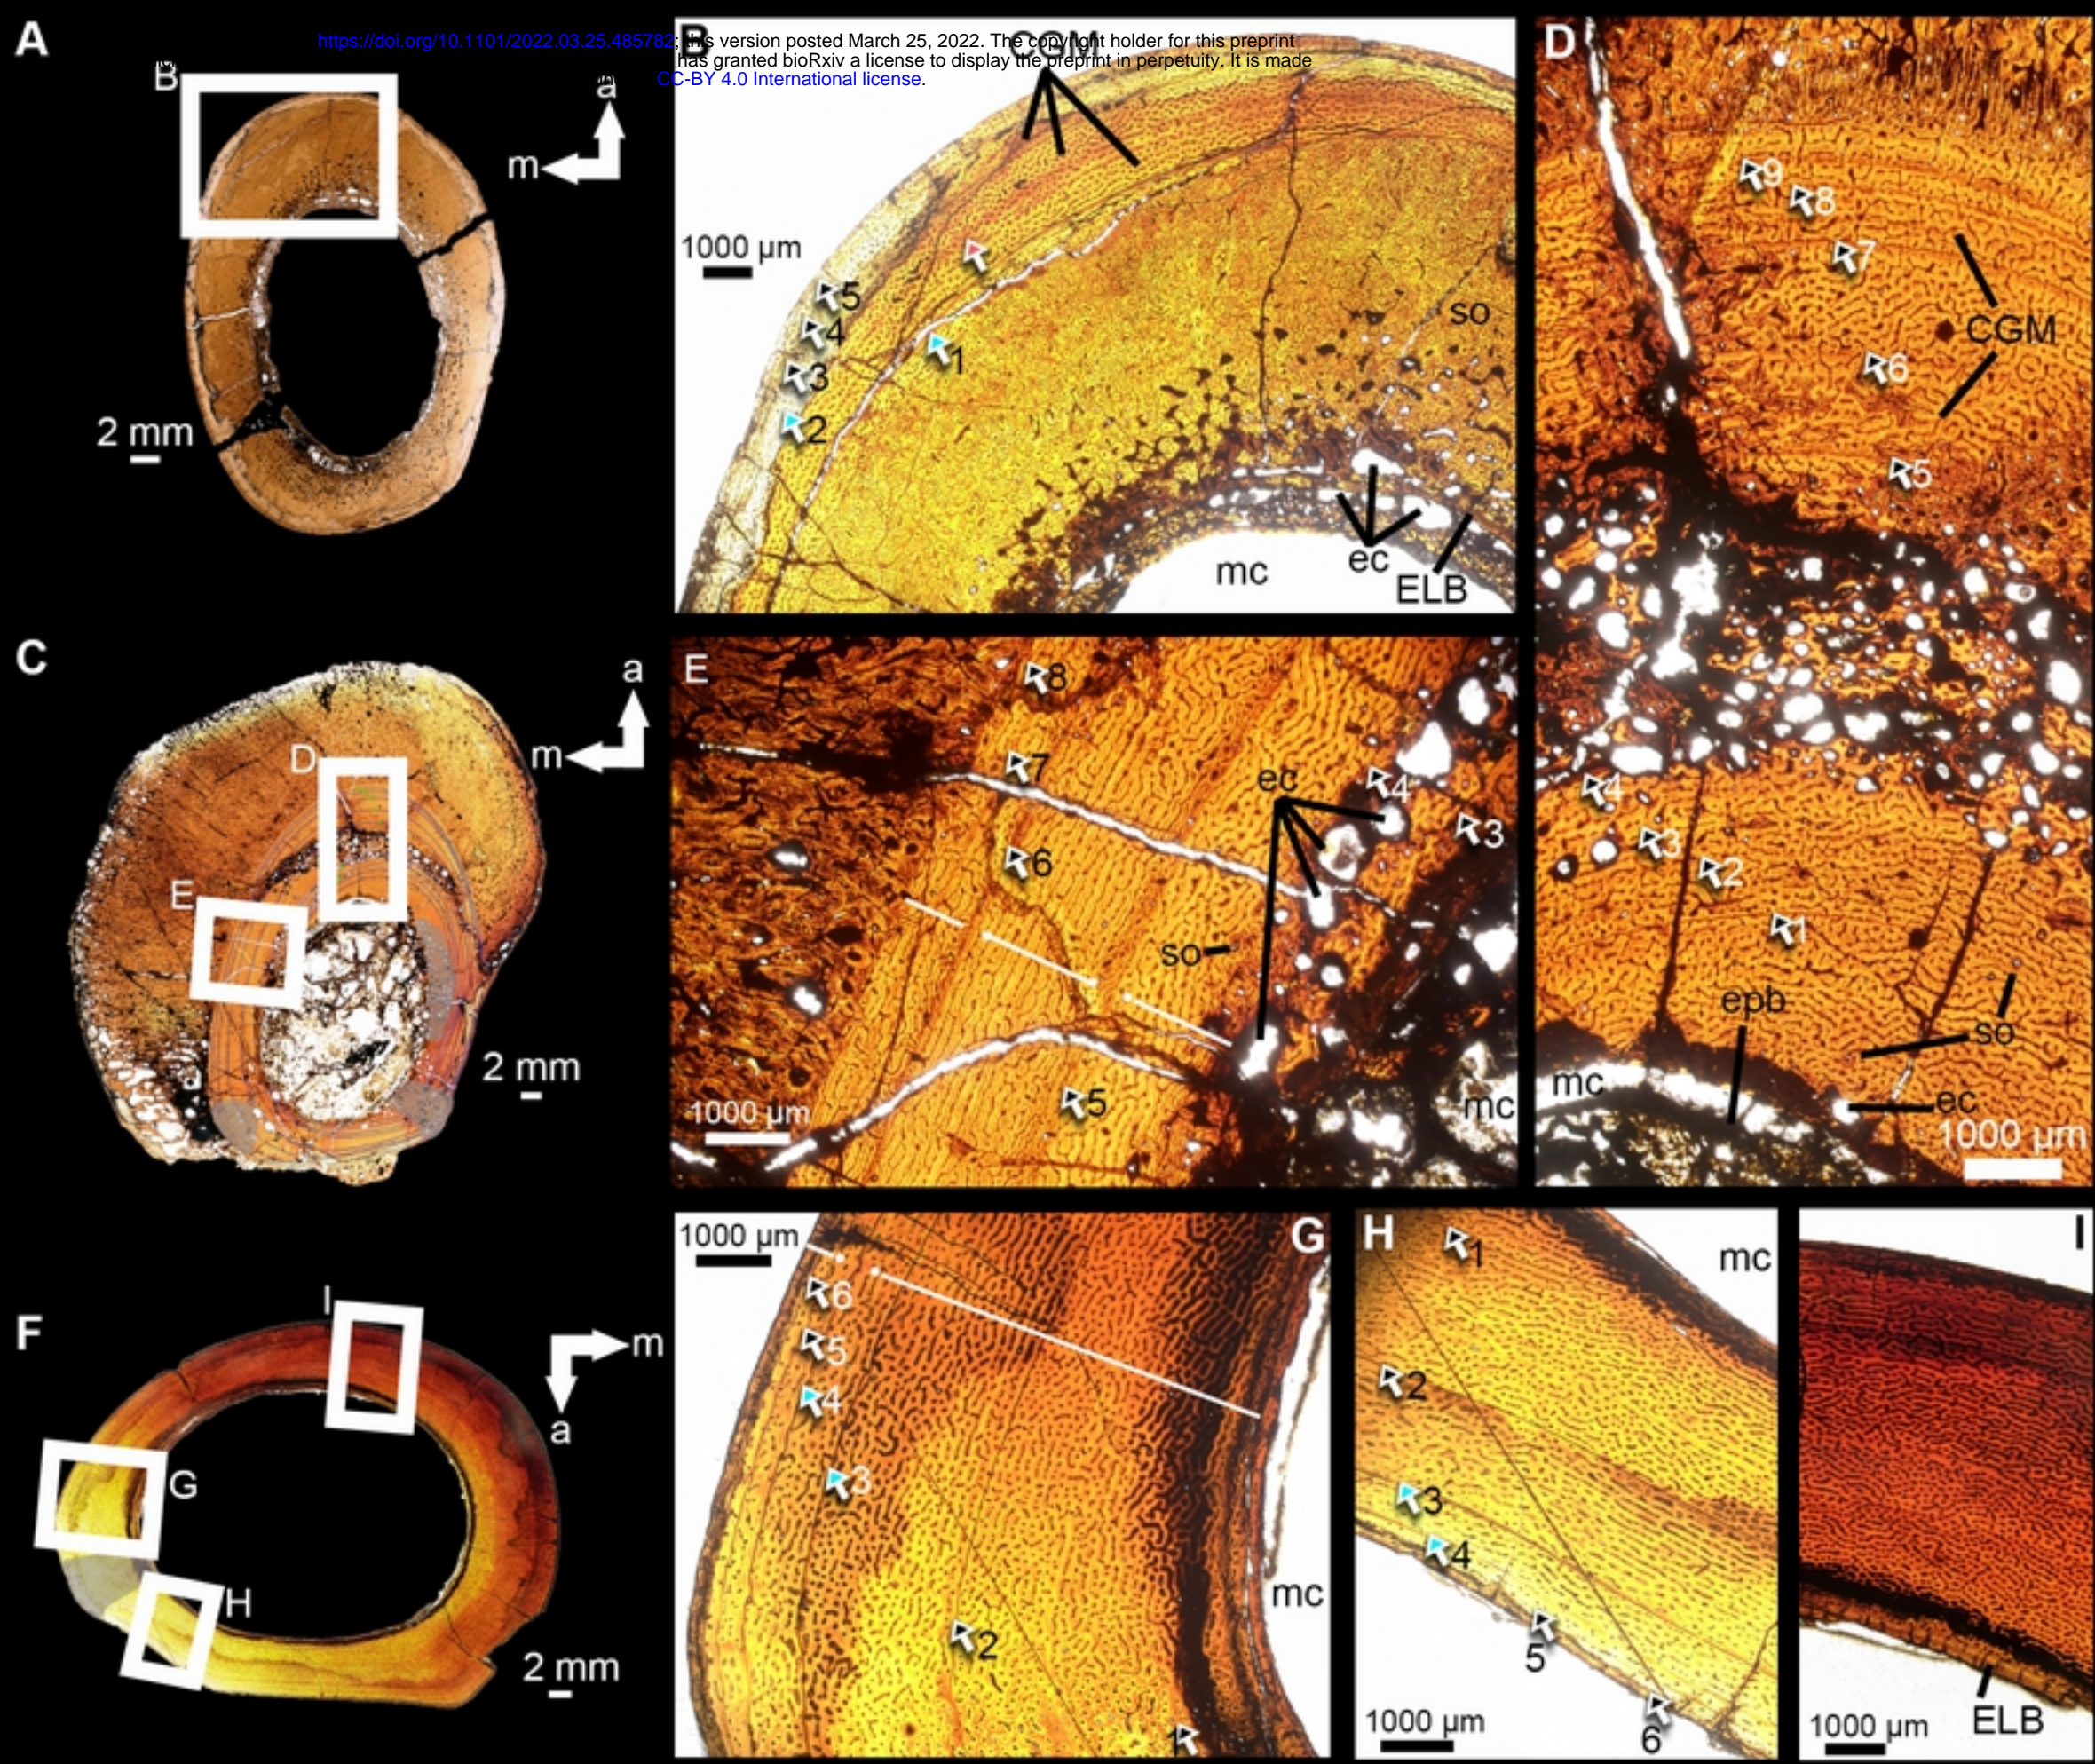

Figure 8



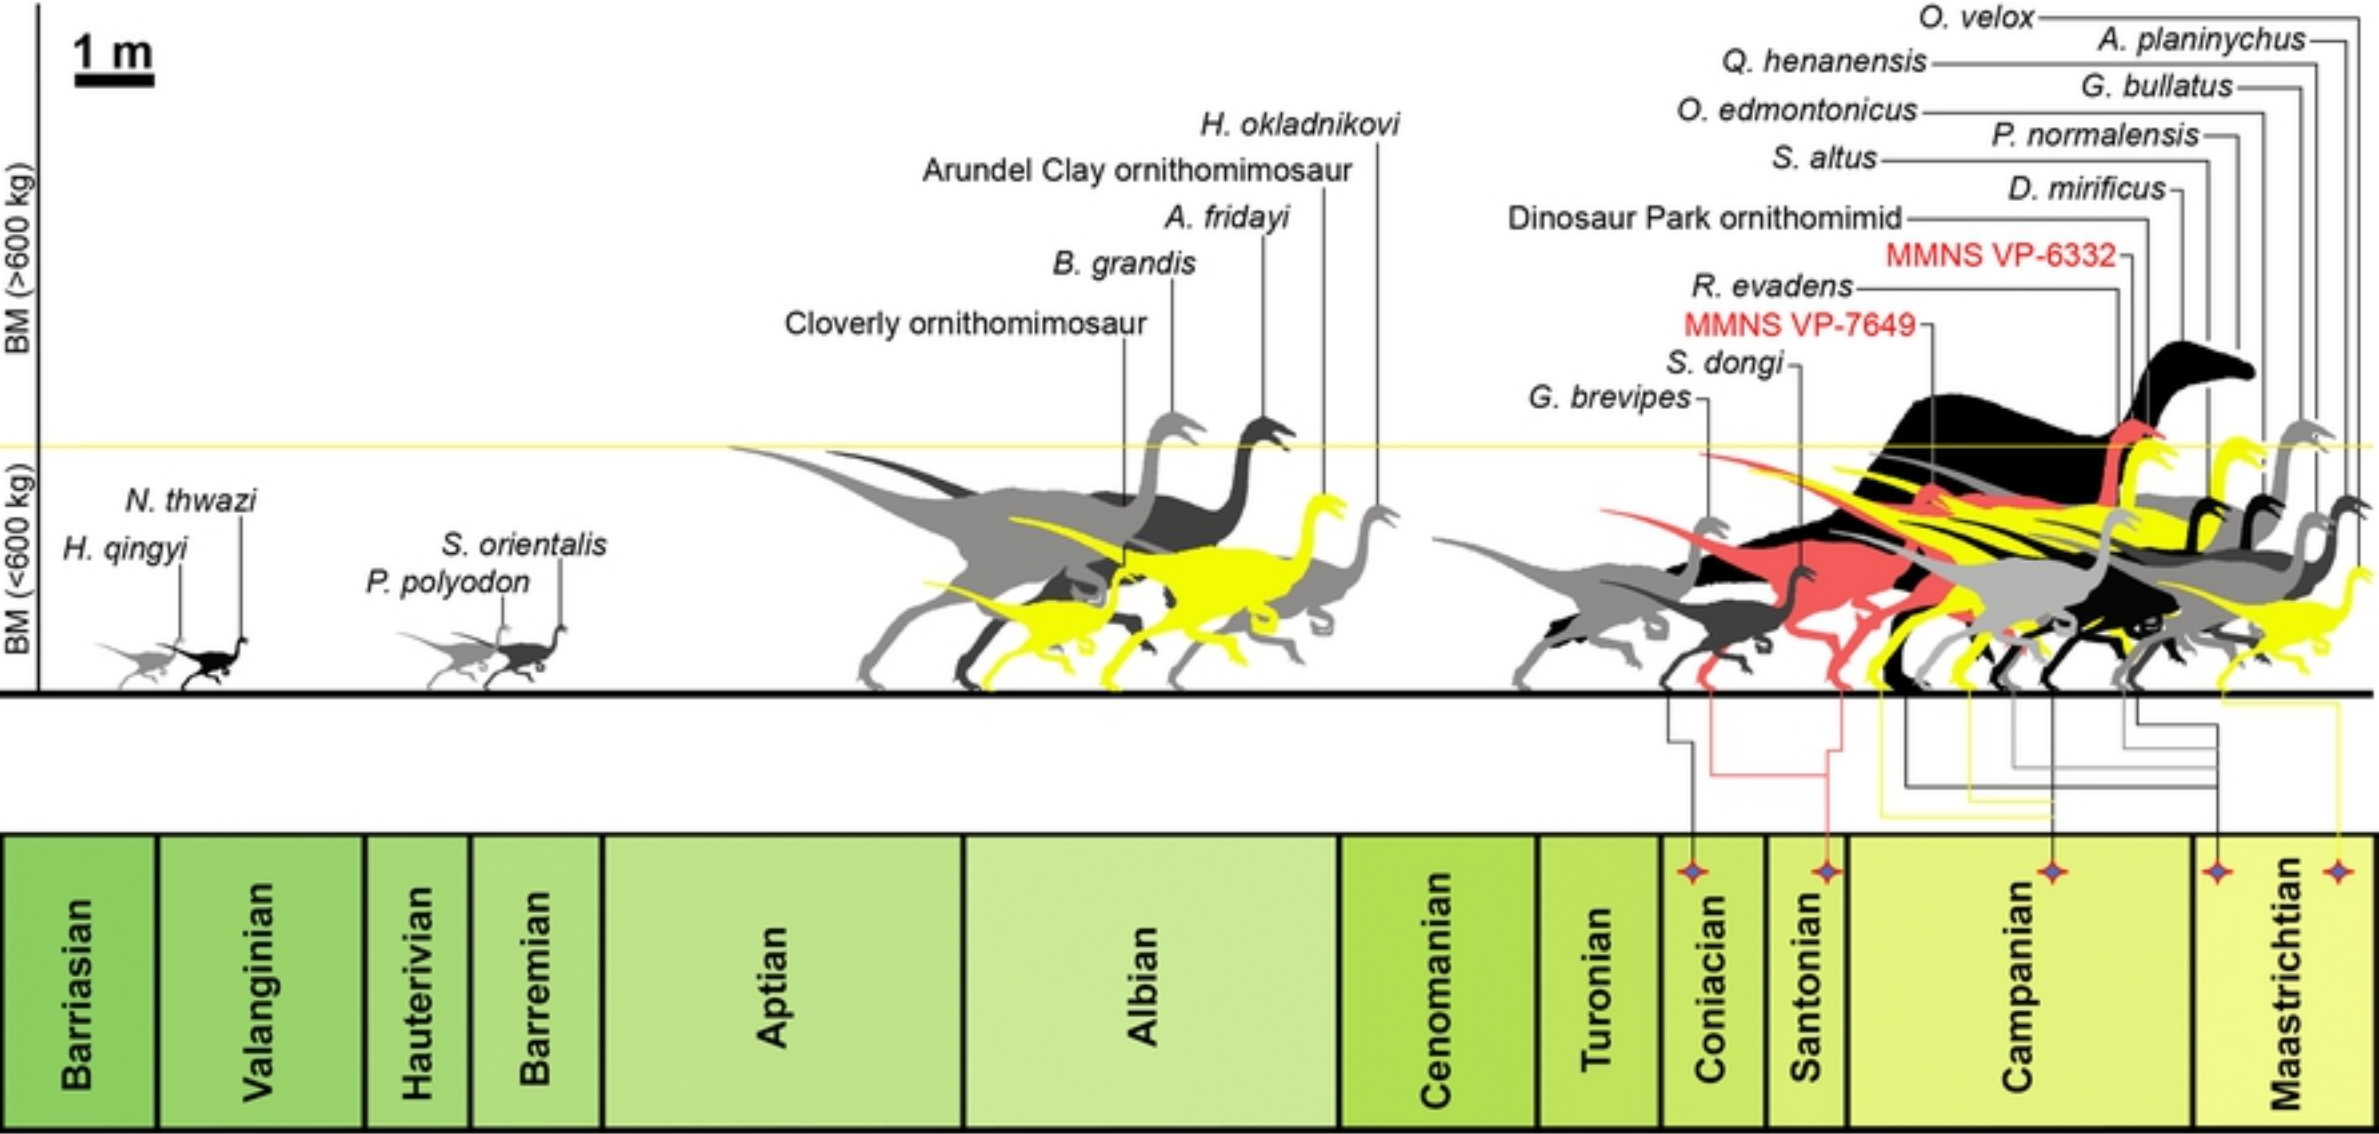

Figure 9



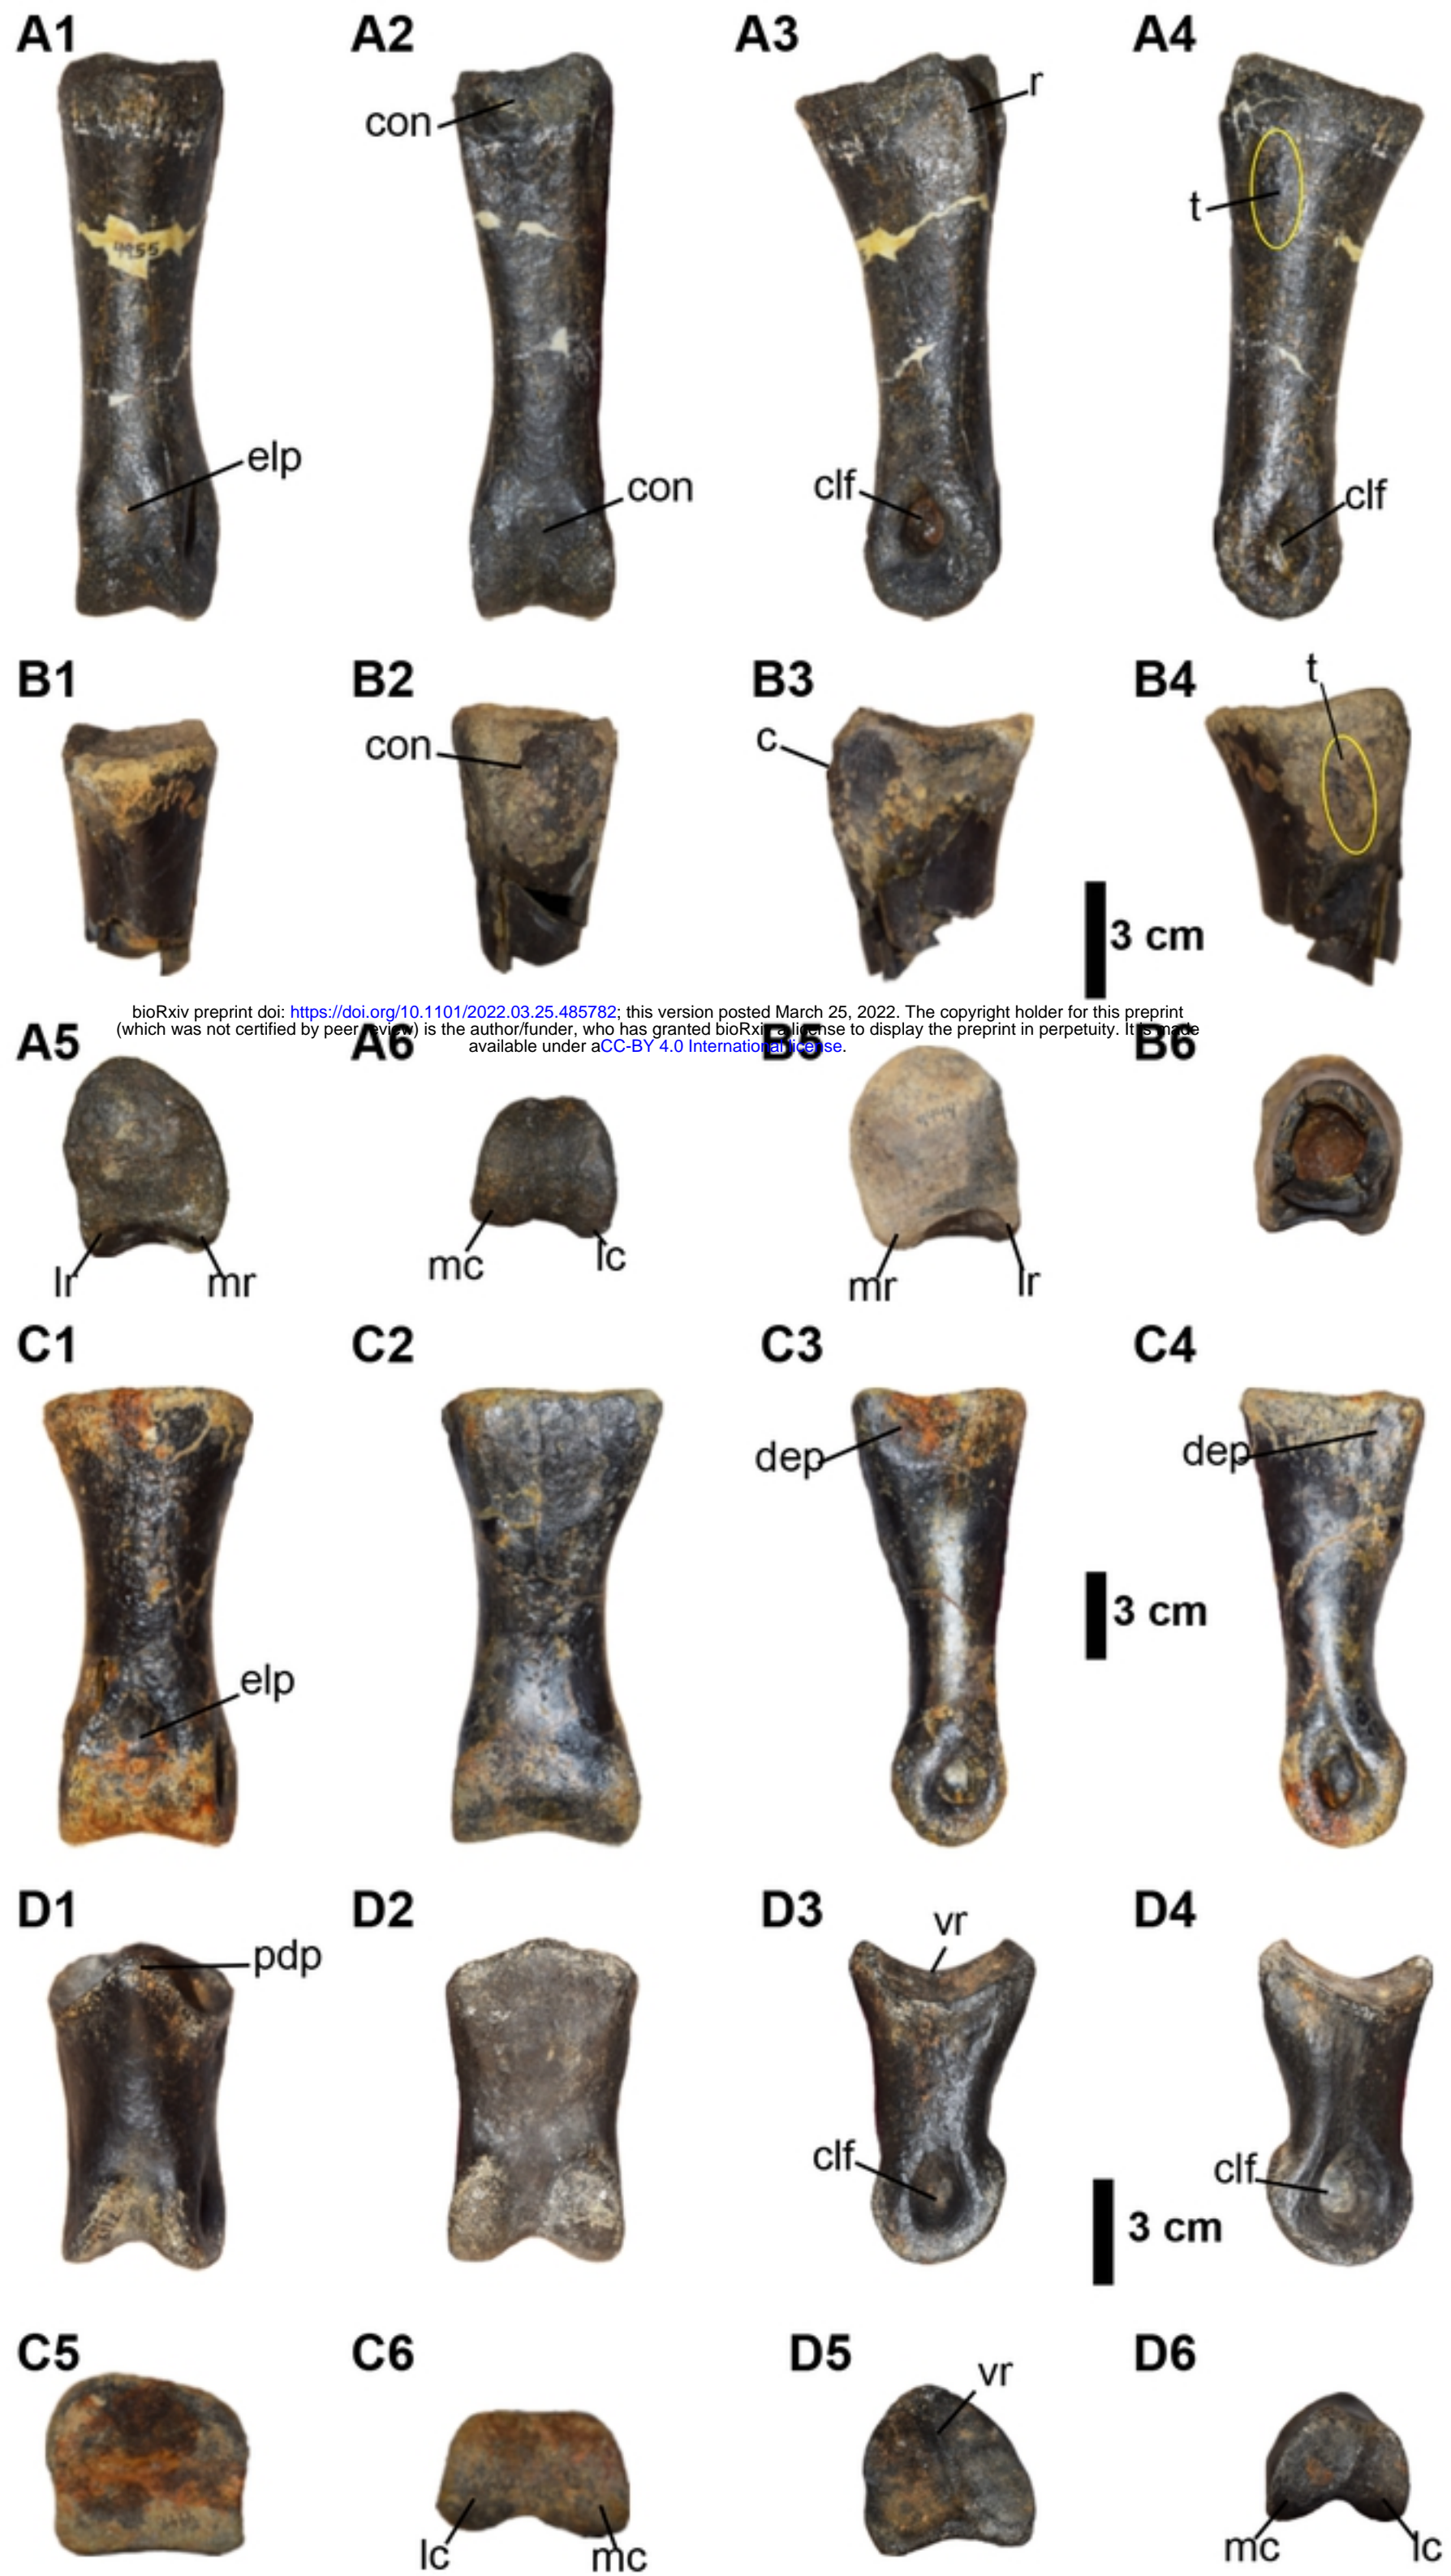

Figure 7
